# Supplementary material for: Synthesis and biological evaluation of novel 1,2-naphthoquinones possessing tetrazolo[1,5-a]pyrimidine scaffolds as potent antitumor agents
Source: Royal Society of Chemistry journal article supplement (doi:10.1039/c5ra00711a), 2015-01-01
Supplement: c5ra00711a1.pdf [file c5ra00711a1.pdf]

**Synthesis and biological evaluation of novel 1,2-naphthoquinones possessing tetrazolo[1,5-*a*]pyrimidine scaffolds as potent antitumor agents**

**Liqiang wu\***

*School of Pharmacy, Xinxiang Medical University, Xinxiang 453003, China*

**Content**

**Copy of IR, <sup>1</sup>H NMR, <sup>13</sup>C NMR and HRMS.....2-60**

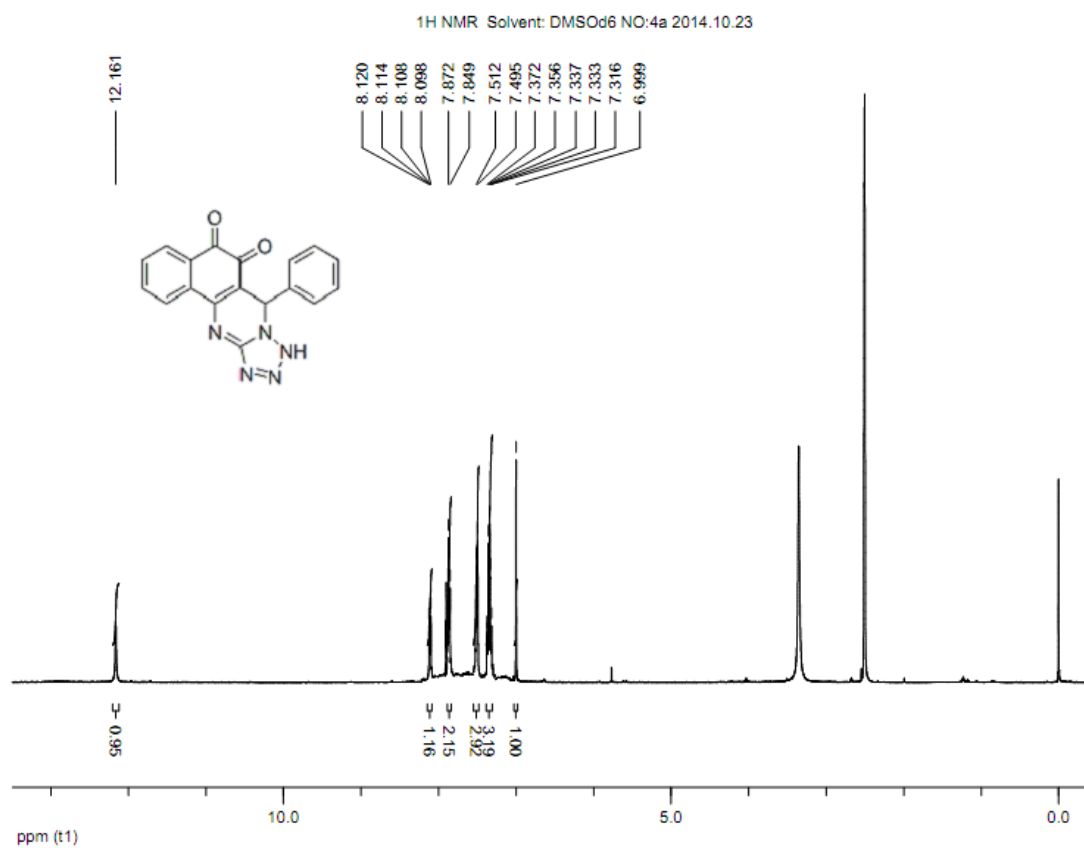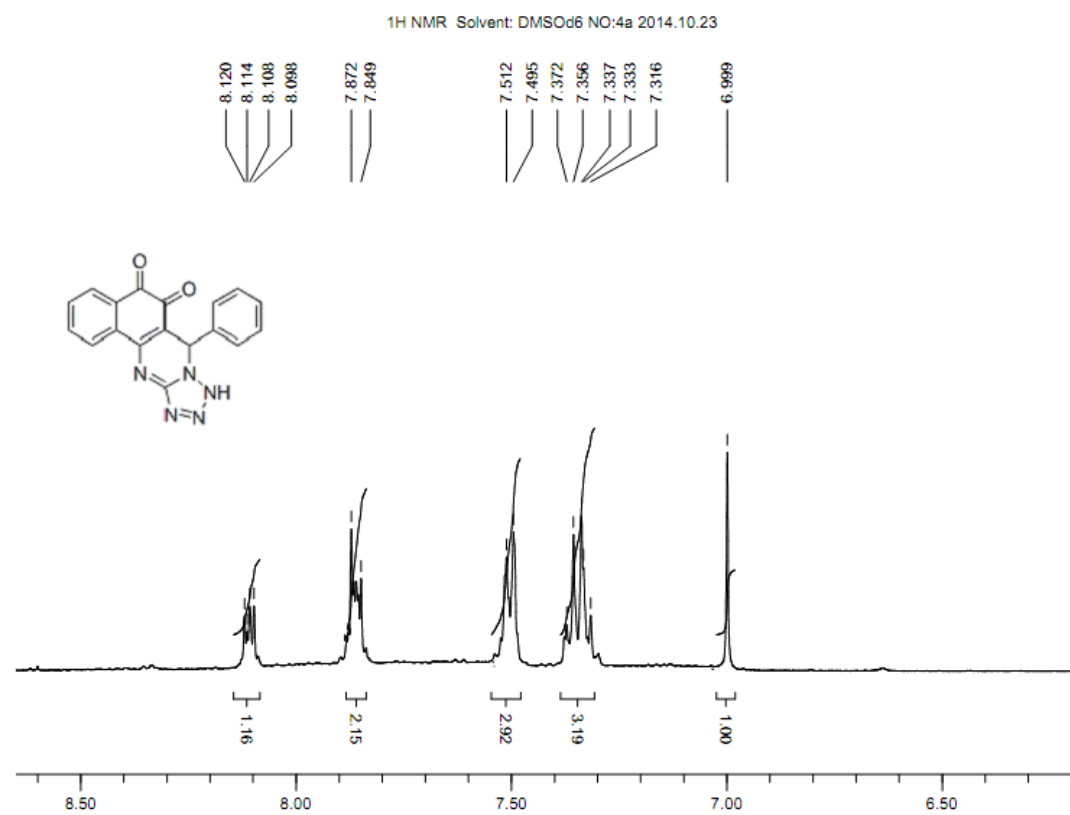

Figure 1 <sup>1</sup>H NMR of 4a

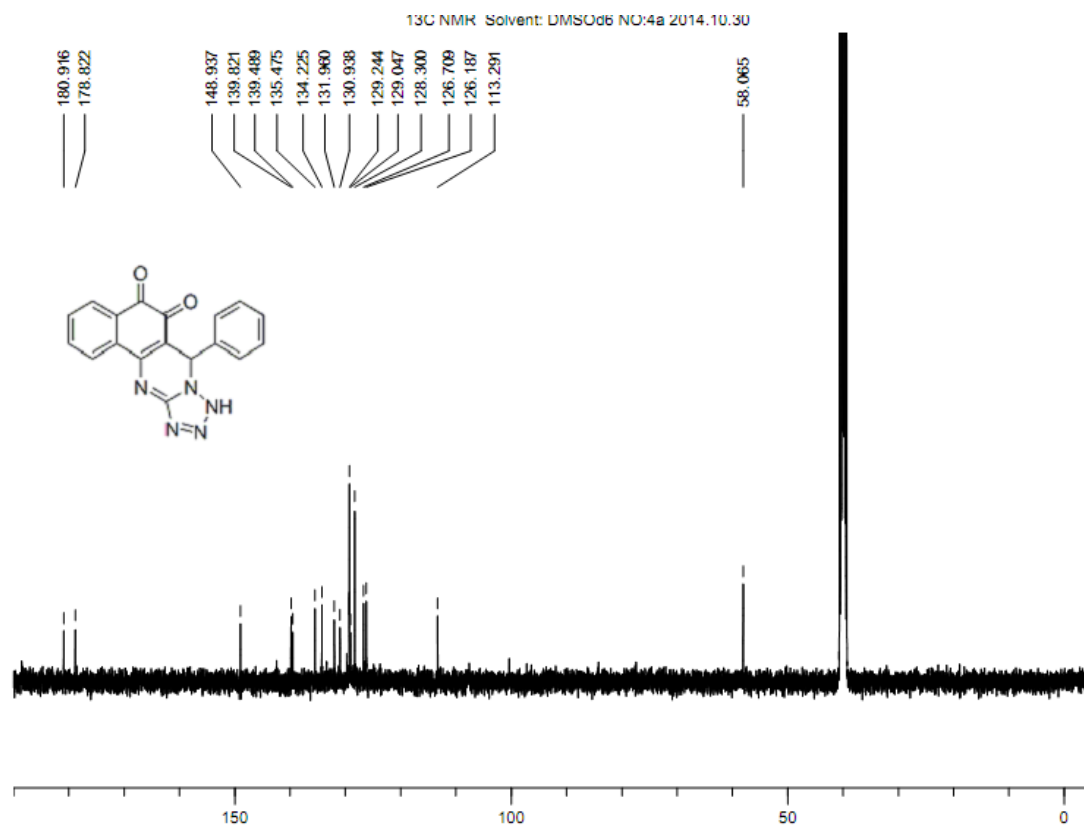

**Figure 2**  $^{13}\text{C}$  NMR of 4a

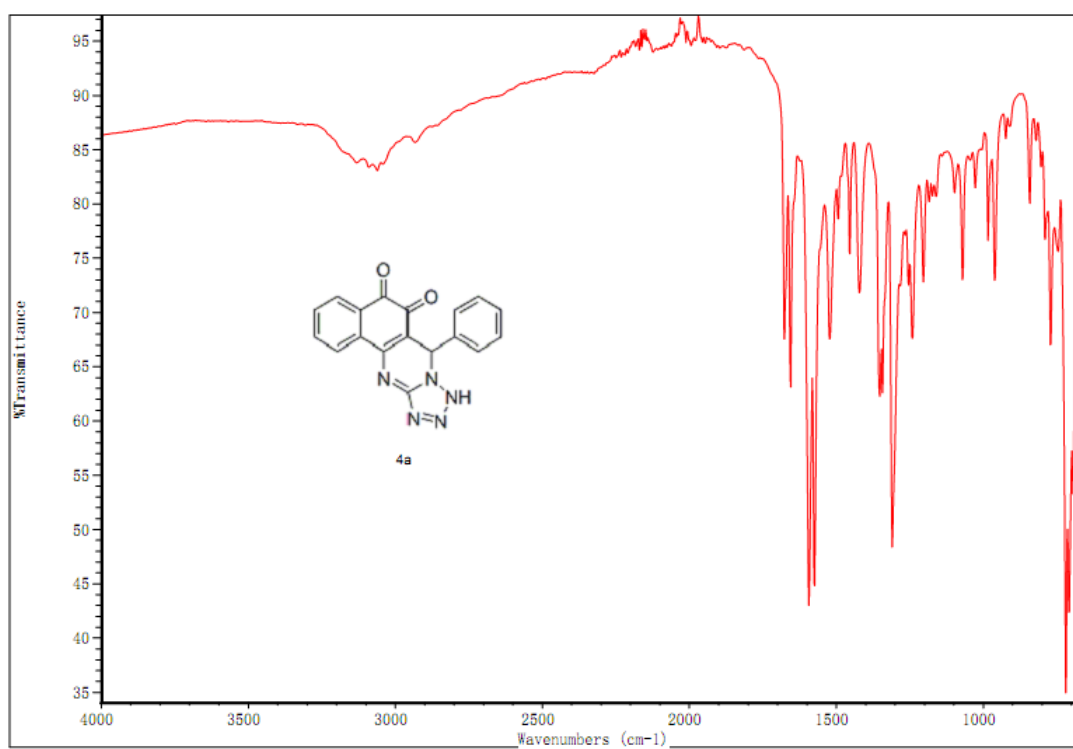

**Figure 3** IR of 4a

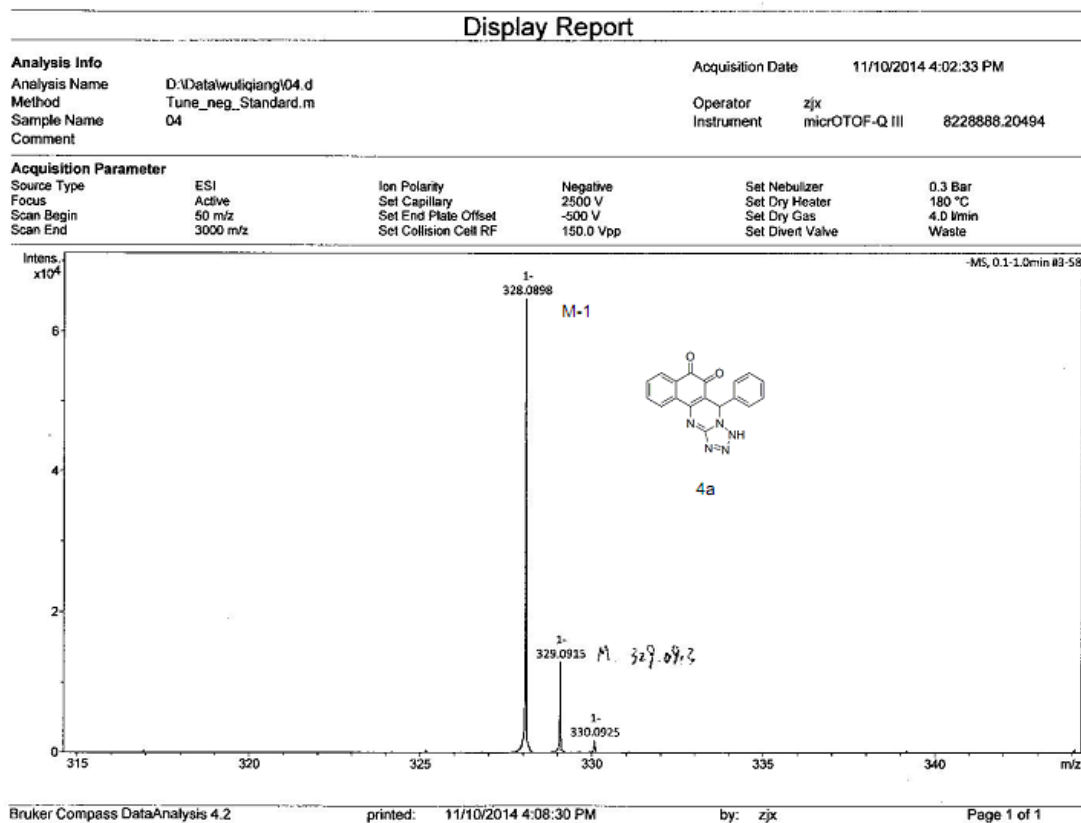

**Figure 4** HRMS of **4a**

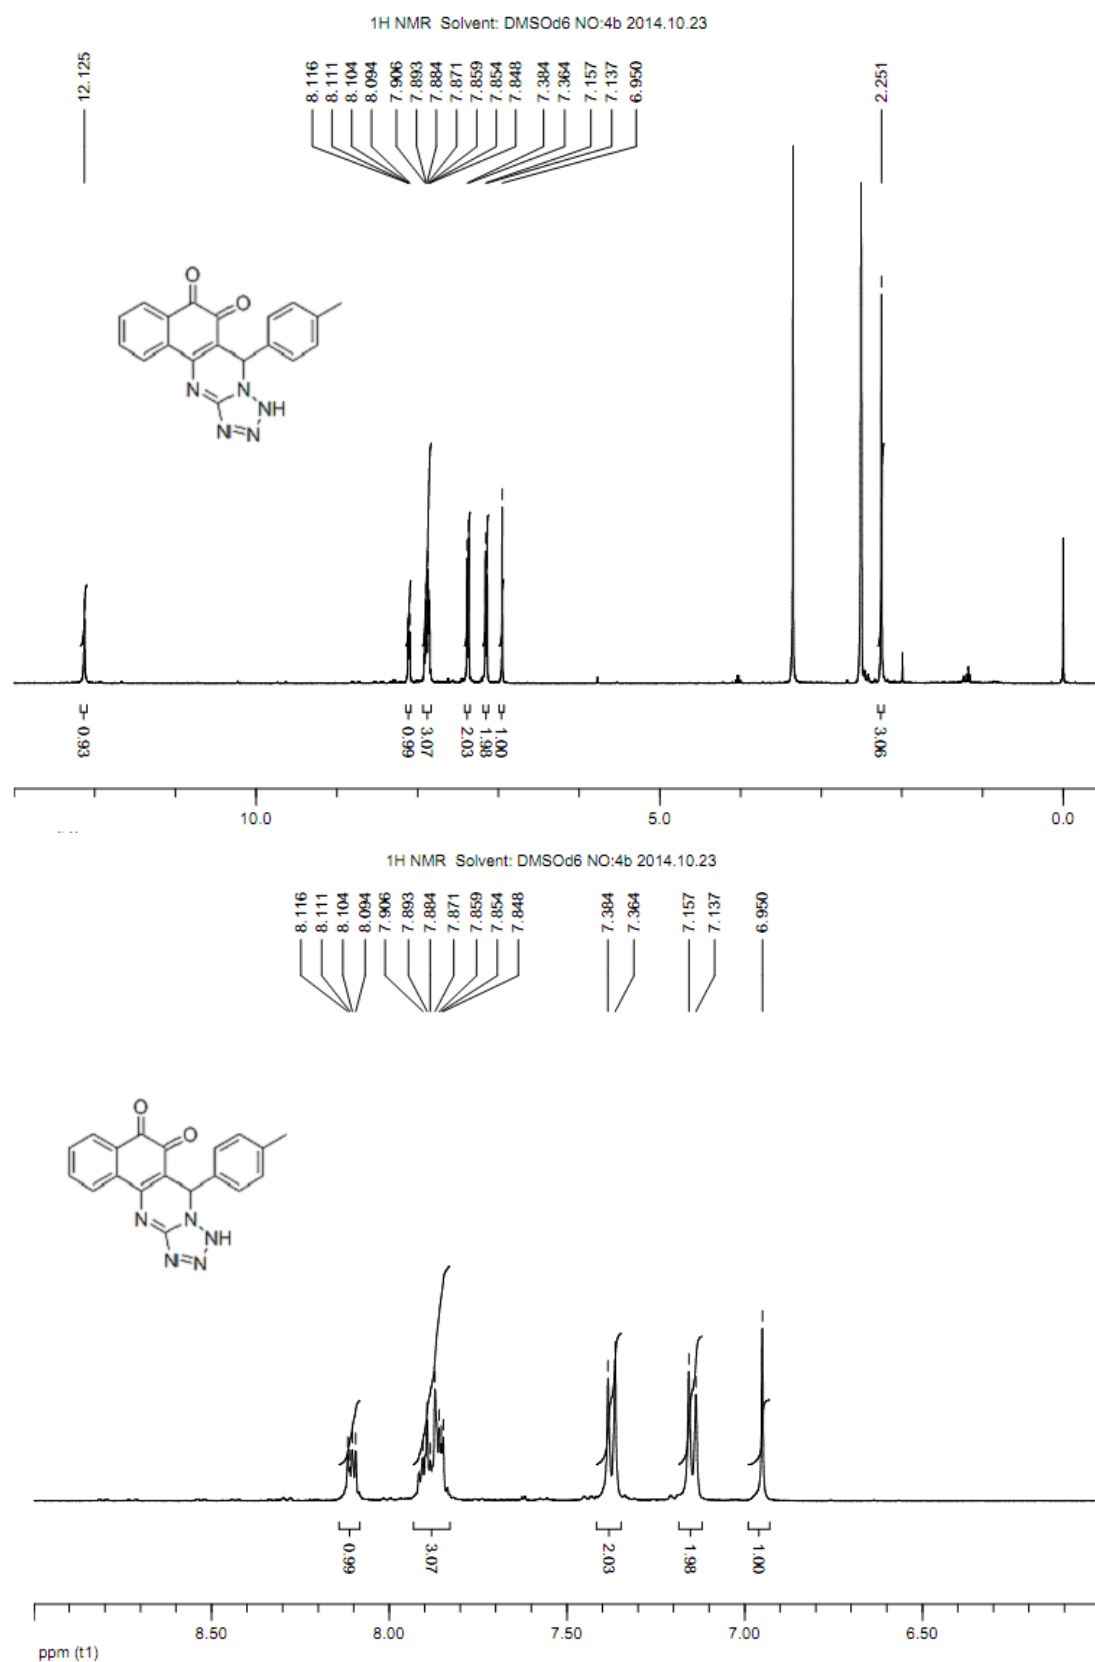

**Figure 5**  $^1\text{H}$  NMR of 4b

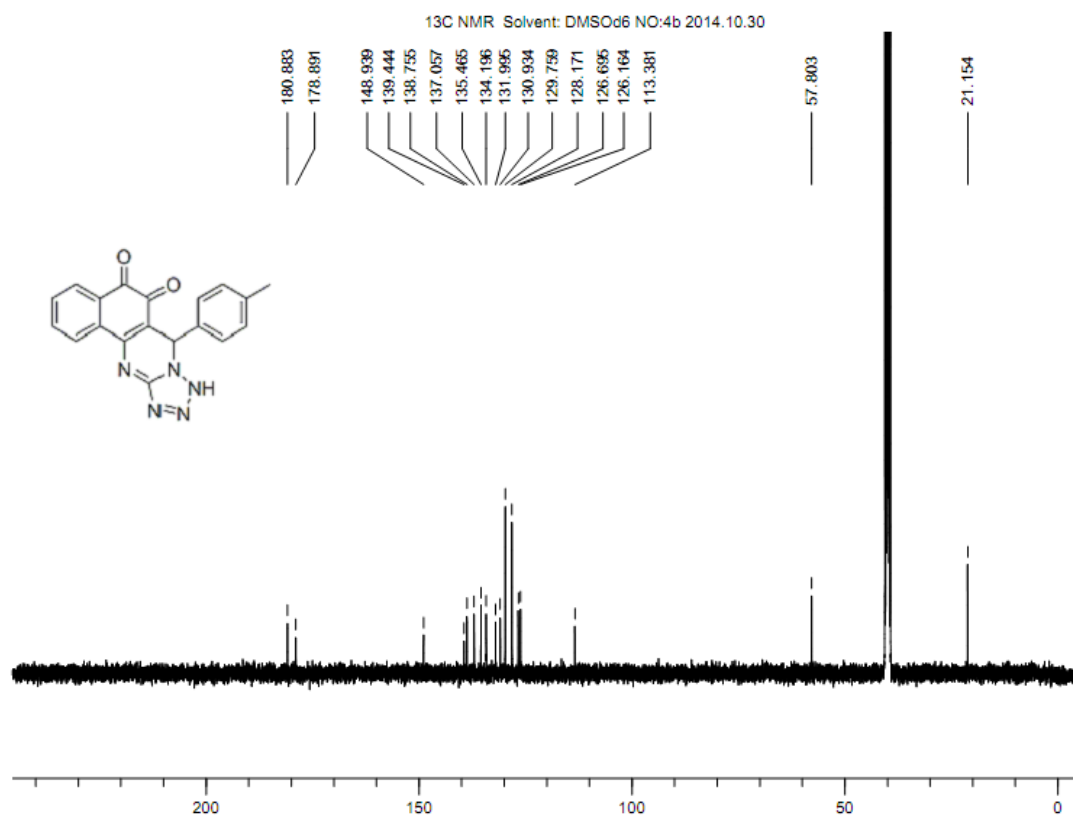

Figure 6 <sup>13</sup>C NMR of 4b

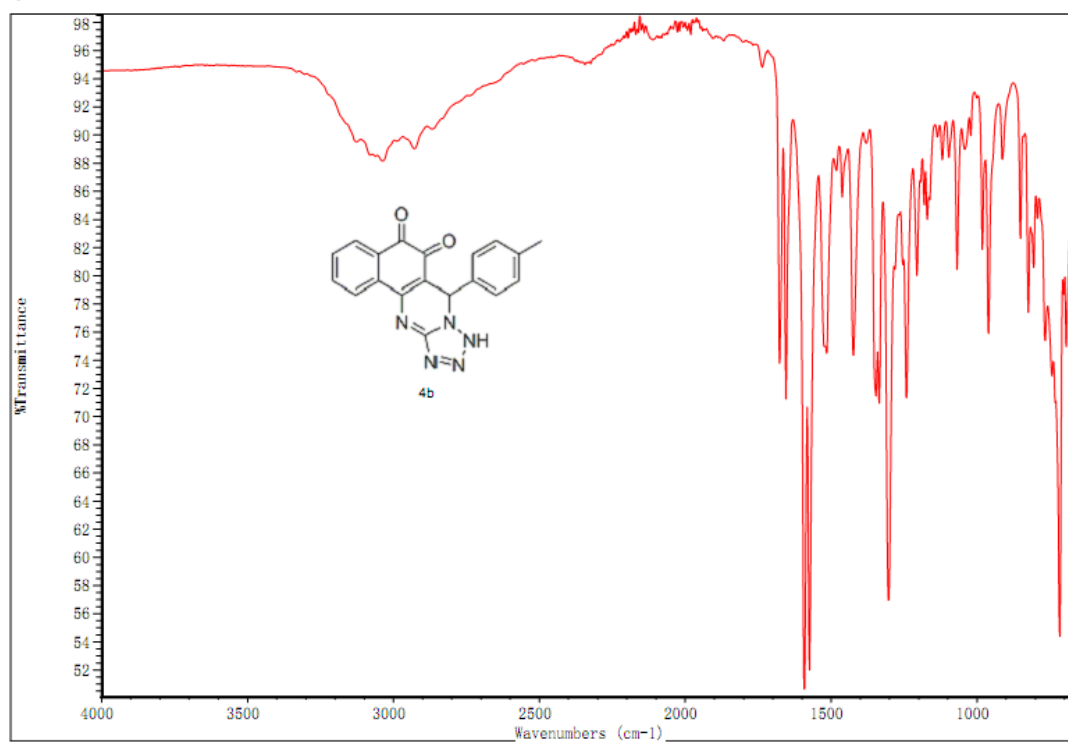

Figure 7 IR of 4b

## Display Report

|                      |                         |                                               |                |
|----------------------|-------------------------|-----------------------------------------------|----------------|
| <b>Analysis Info</b> |                         | <b>Acquisition Date</b> 11/10/2014 5:12:55 PM |                |
| Analysis Name        | D:\Data\wuliqiang\016.d | Operator                                      | zjx            |
| Method               | Tune_pos_Standard.m     | Instrument                                    | micrOTOF-Q III |
| Sample Name          | 016                     |                                               | 8226888.20494  |
| Comment              |                         |                                               |                |

### Acquisition Parameter

|             |          |                       |           |                  |           |
|-------------|----------|-----------------------|-----------|------------------|-----------|
| Source Type | ESI      | Ion Polarity          | Positive  | Set Nebulizer    | 0.3 Bar   |
| Focus       | Active   | Set Capillary         | 4500 V    | Set Dry Heater   | 200 °C    |
| Scan Begin  | 50 m/z   | Set End Plate Offset  | -500 V    | Set Dry Gas      | 4.0 l/min |
| Scan End    | 1000 m/z | Set Collision Cell RF | 180.0 Vpp | Set Divert Valve | Waste     |

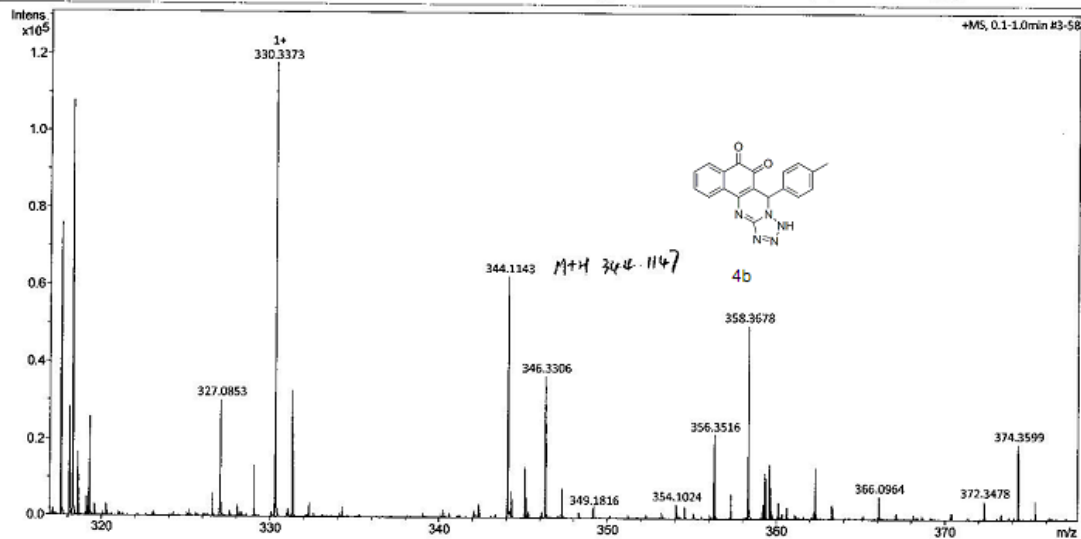

Bruker Compass DataAnalysis 4.2

printed: 11/10/2014 5:14:50 PM

by: zjx

Page 1 of 1

**Figure 8 HRMS of 4b**

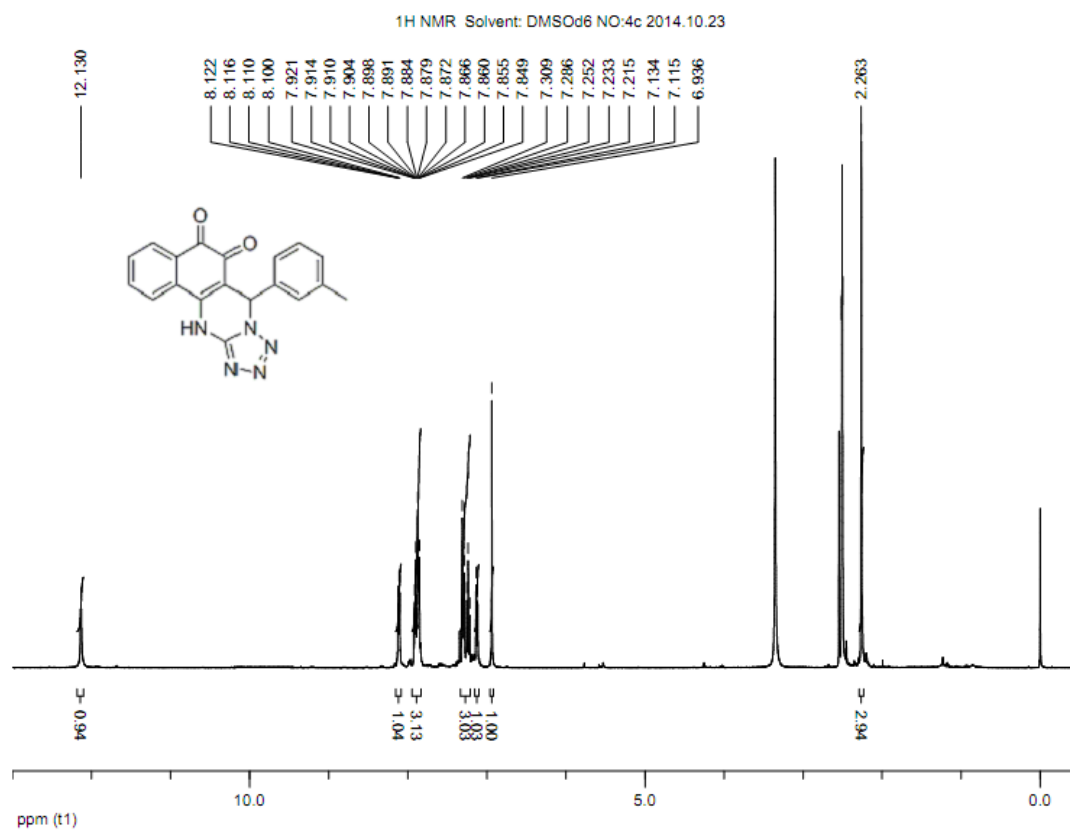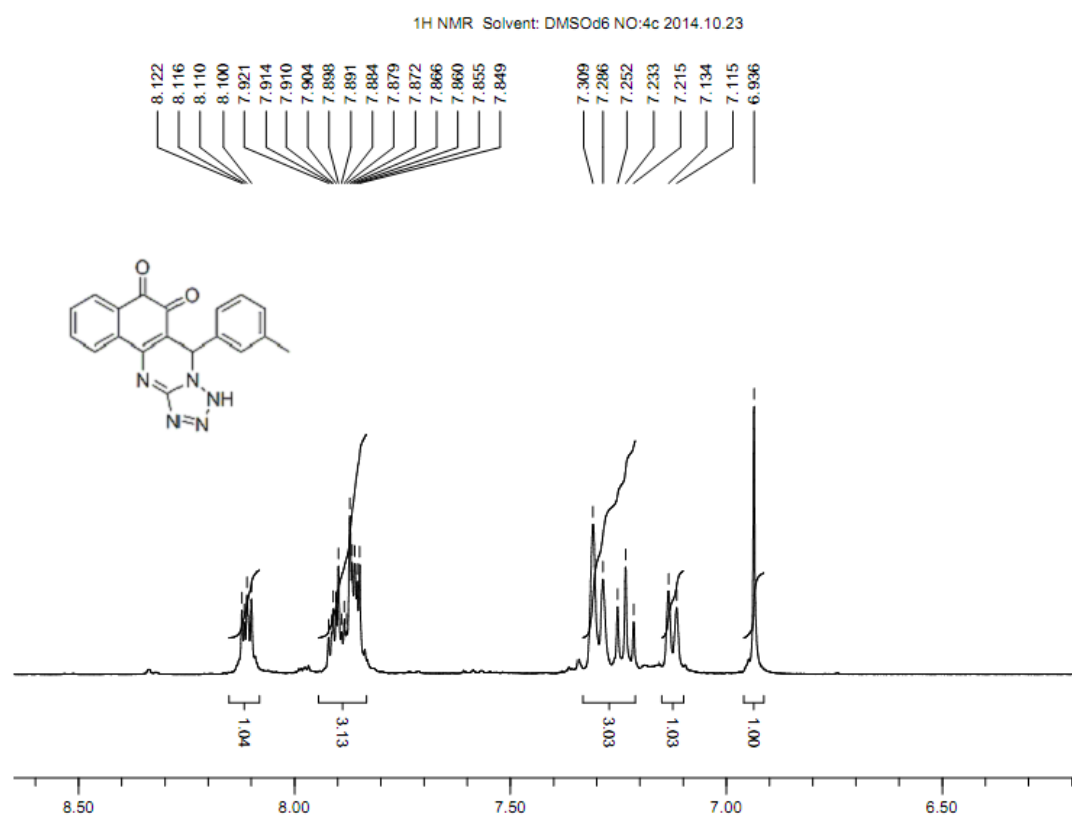

**Figure 9**  $^1\text{H}$  NMR of 4c



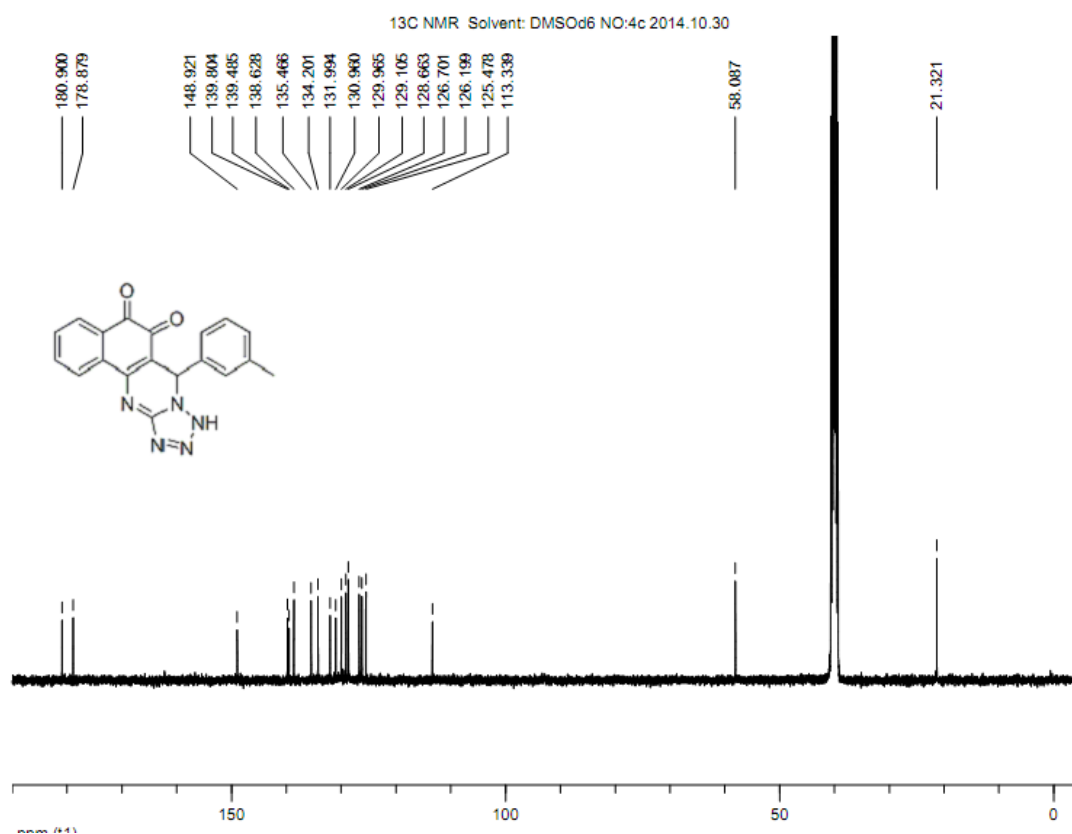

Figure 10 <sup>13</sup>C NMR of 4c

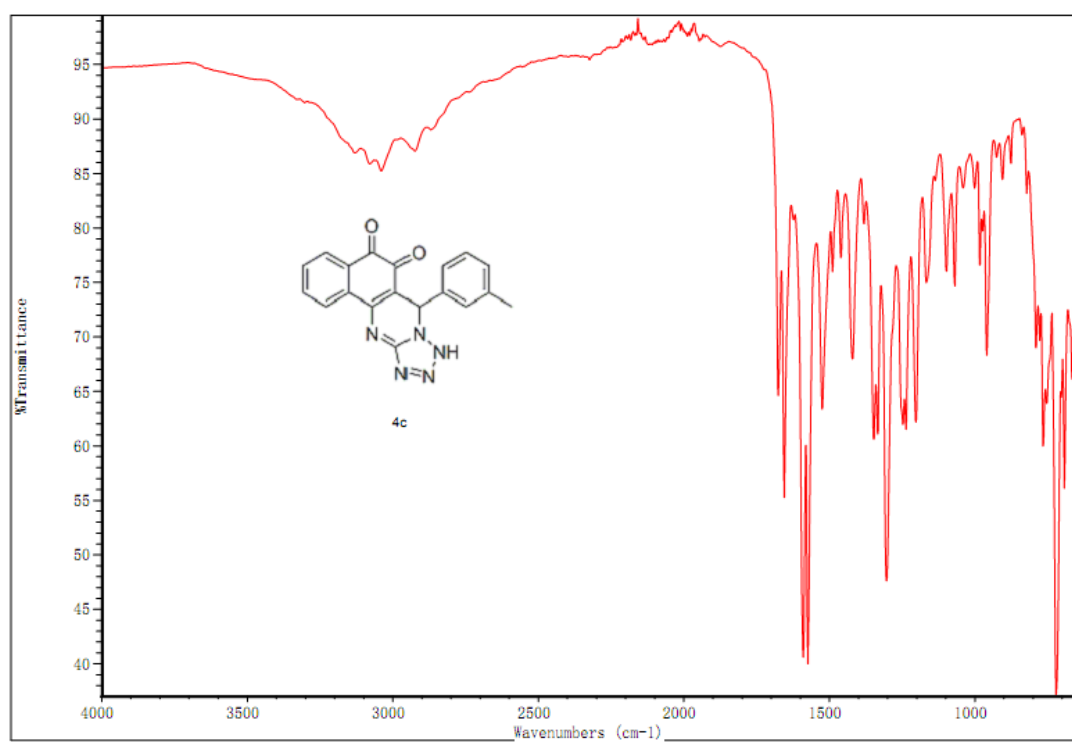

Figure 11 IR of 4c

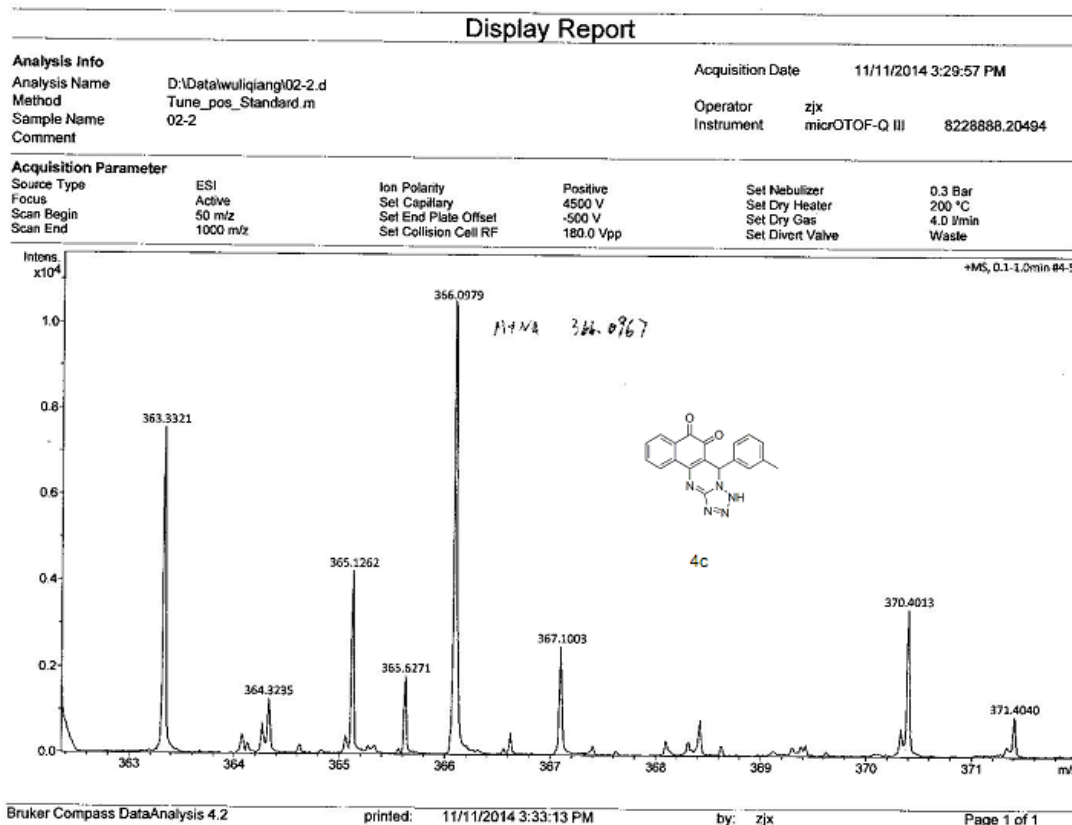

**Figure 12** HRMS of **4c**

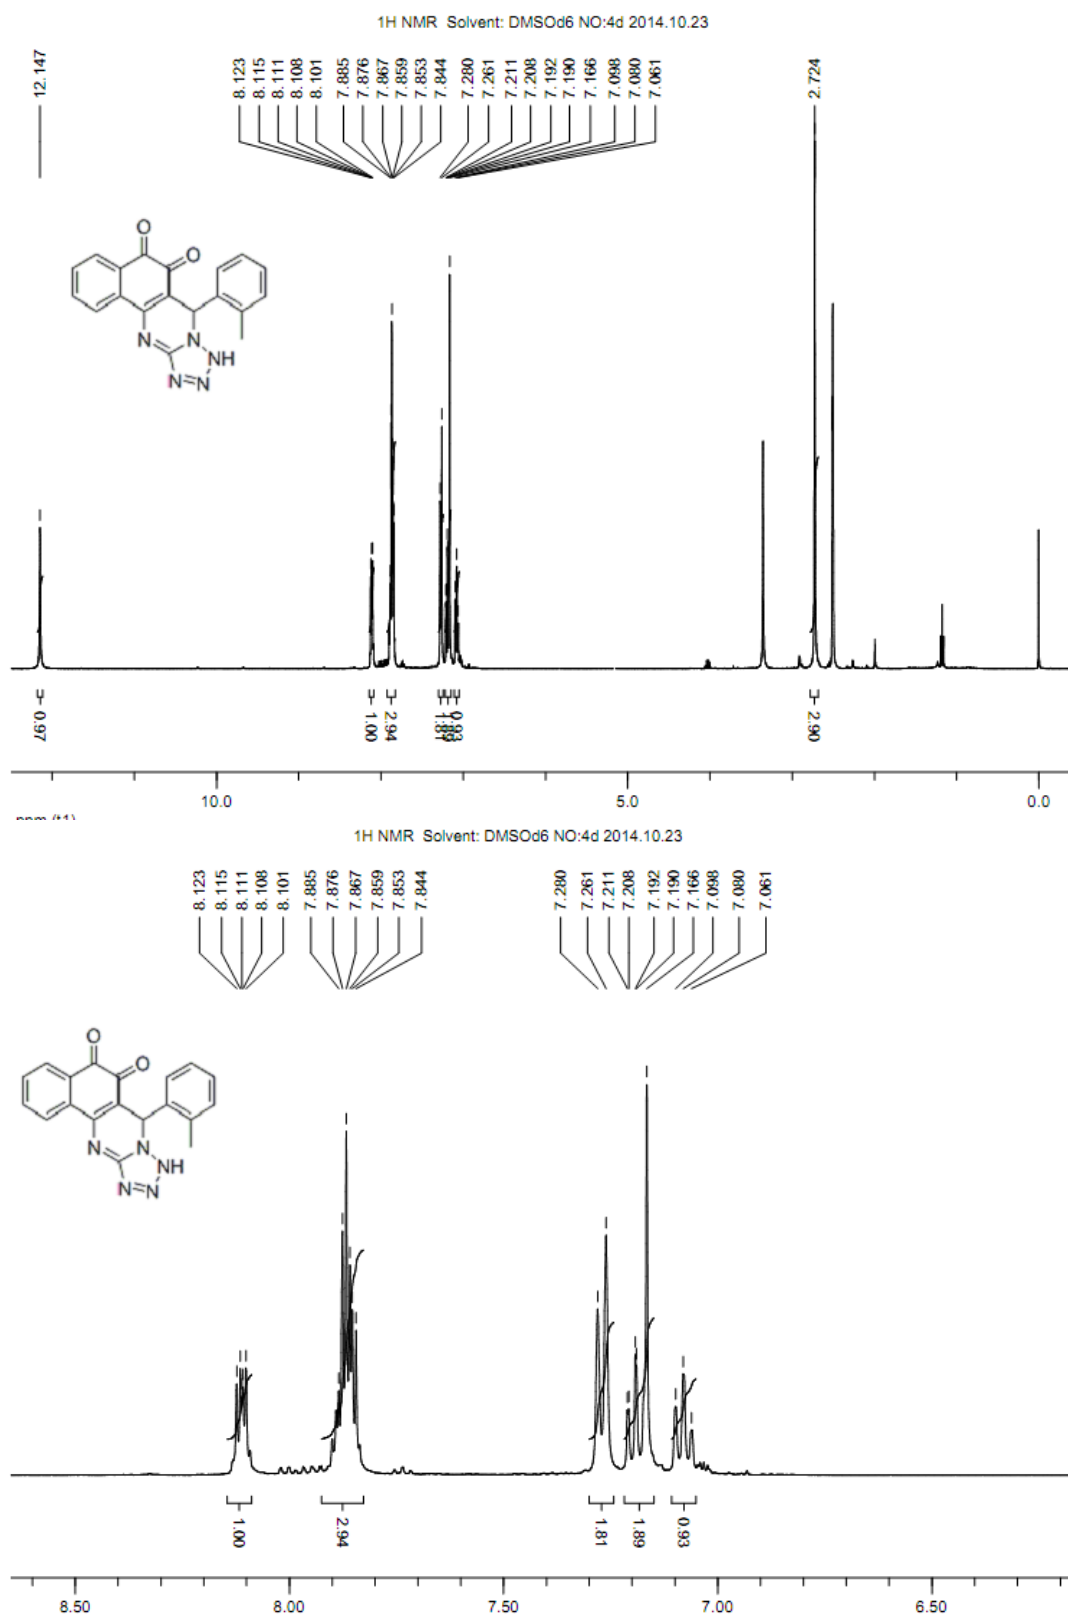

Figure 13  $^1\text{H}$  NMR of 4d

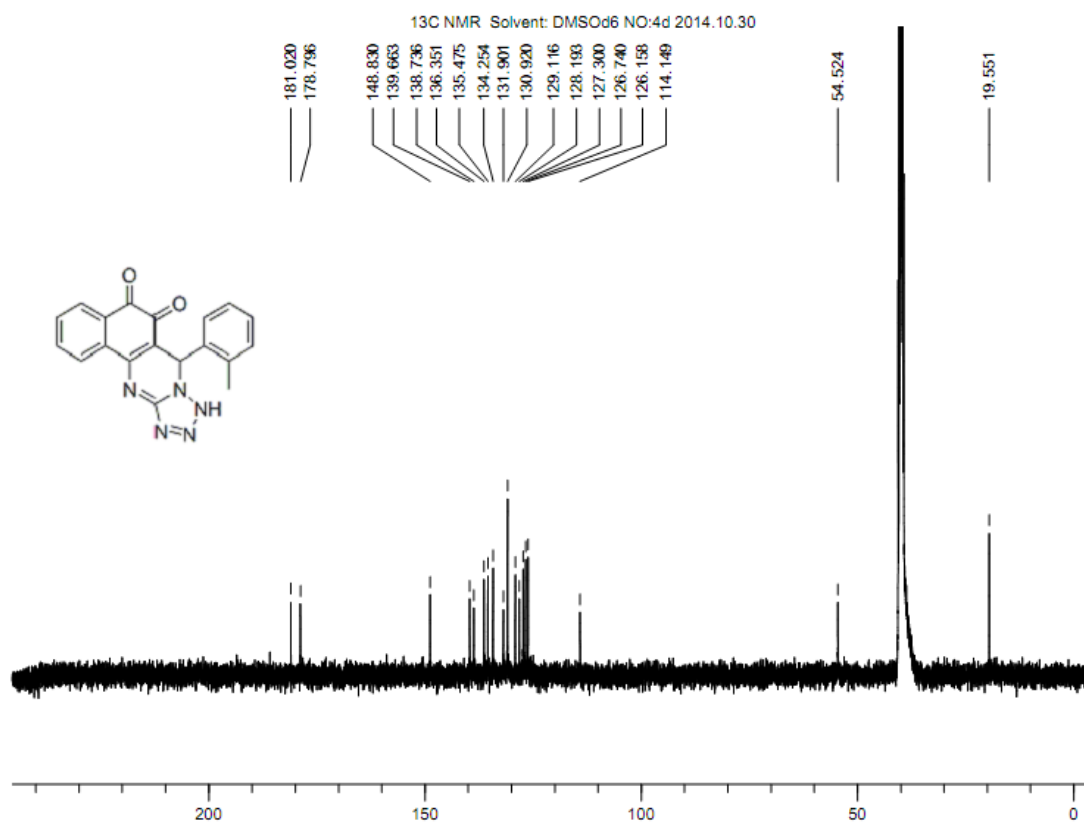

**Figure 14** <sup>13</sup>C NMR of 4d

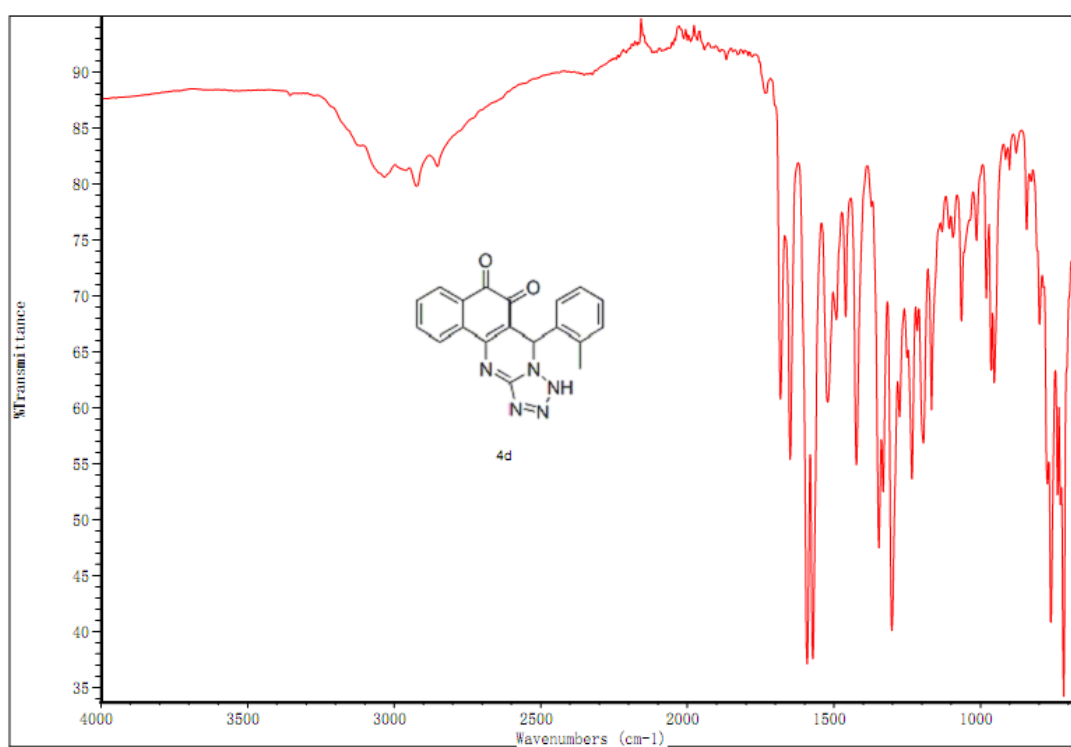

**Figure 15** IR of 4d

# Display Report

|                      |                         |                                        |                |
|----------------------|-------------------------|----------------------------------------|----------------|
| <b>Analysis Info</b> |                         | Acquisition Date 11/10/2014 4:53:40 PM |                |
| Analysis Name        | D:\Data\wuliqiang\013.d | Operator                               | zjx            |
| Method               | Tune_pos_Standard.m     | Instrument                             | micrOTOF-Q III |
| Sample Name          | 013                     |                                        | 8228888.20494  |
| Comment              |                         |                                        |                |

|                              |          |                       |           |                  |           |
|------------------------------|----------|-----------------------|-----------|------------------|-----------|
| <b>Acquisition Parameter</b> |          |                       |           |                  |           |
| Source Type                  | ESI      | Ion Polarity          | Positive  | Set Nebulizer    | 0.3 Bar   |
| Focus                        | Active   | Set Capillary         | 4500 V    | Set Dry Heater   | 200 °C    |
| Scan Begin                   | 50 m/z   | Set End Plate Offset  | -500 V    | Set Dry Gas      | 4.0 l/min |
| Scan End                     | 1000 m/z | Set Collision Cell RF | 180.0 Vpp | Set Divert Valve | Waste     |

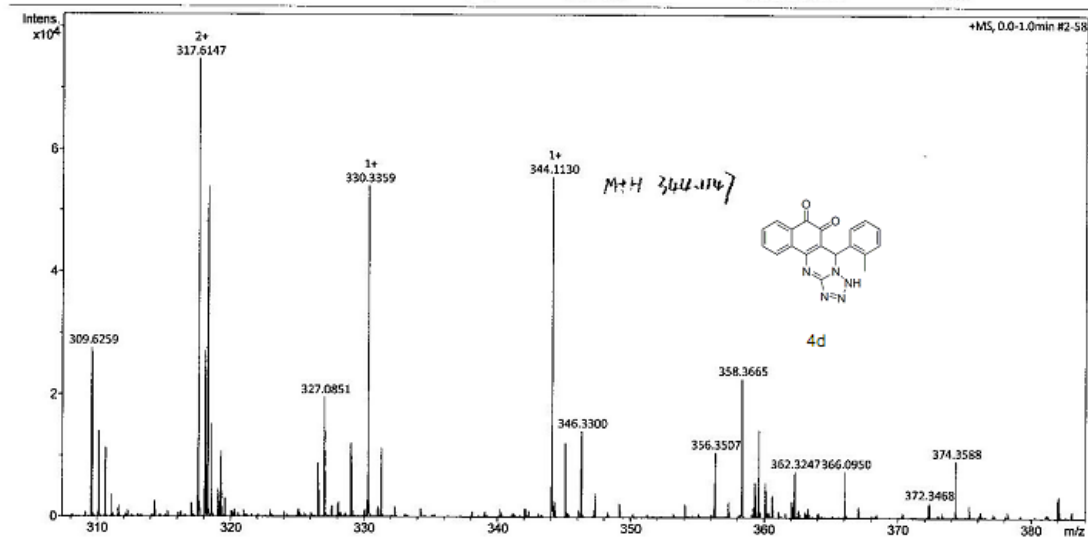

Bruker Compass DataAnalysis 4.2 printed: 11/10/2014 4:55:29 PM by: zjx Page 1 of 1

**Figure 16** HRMS of **4d**

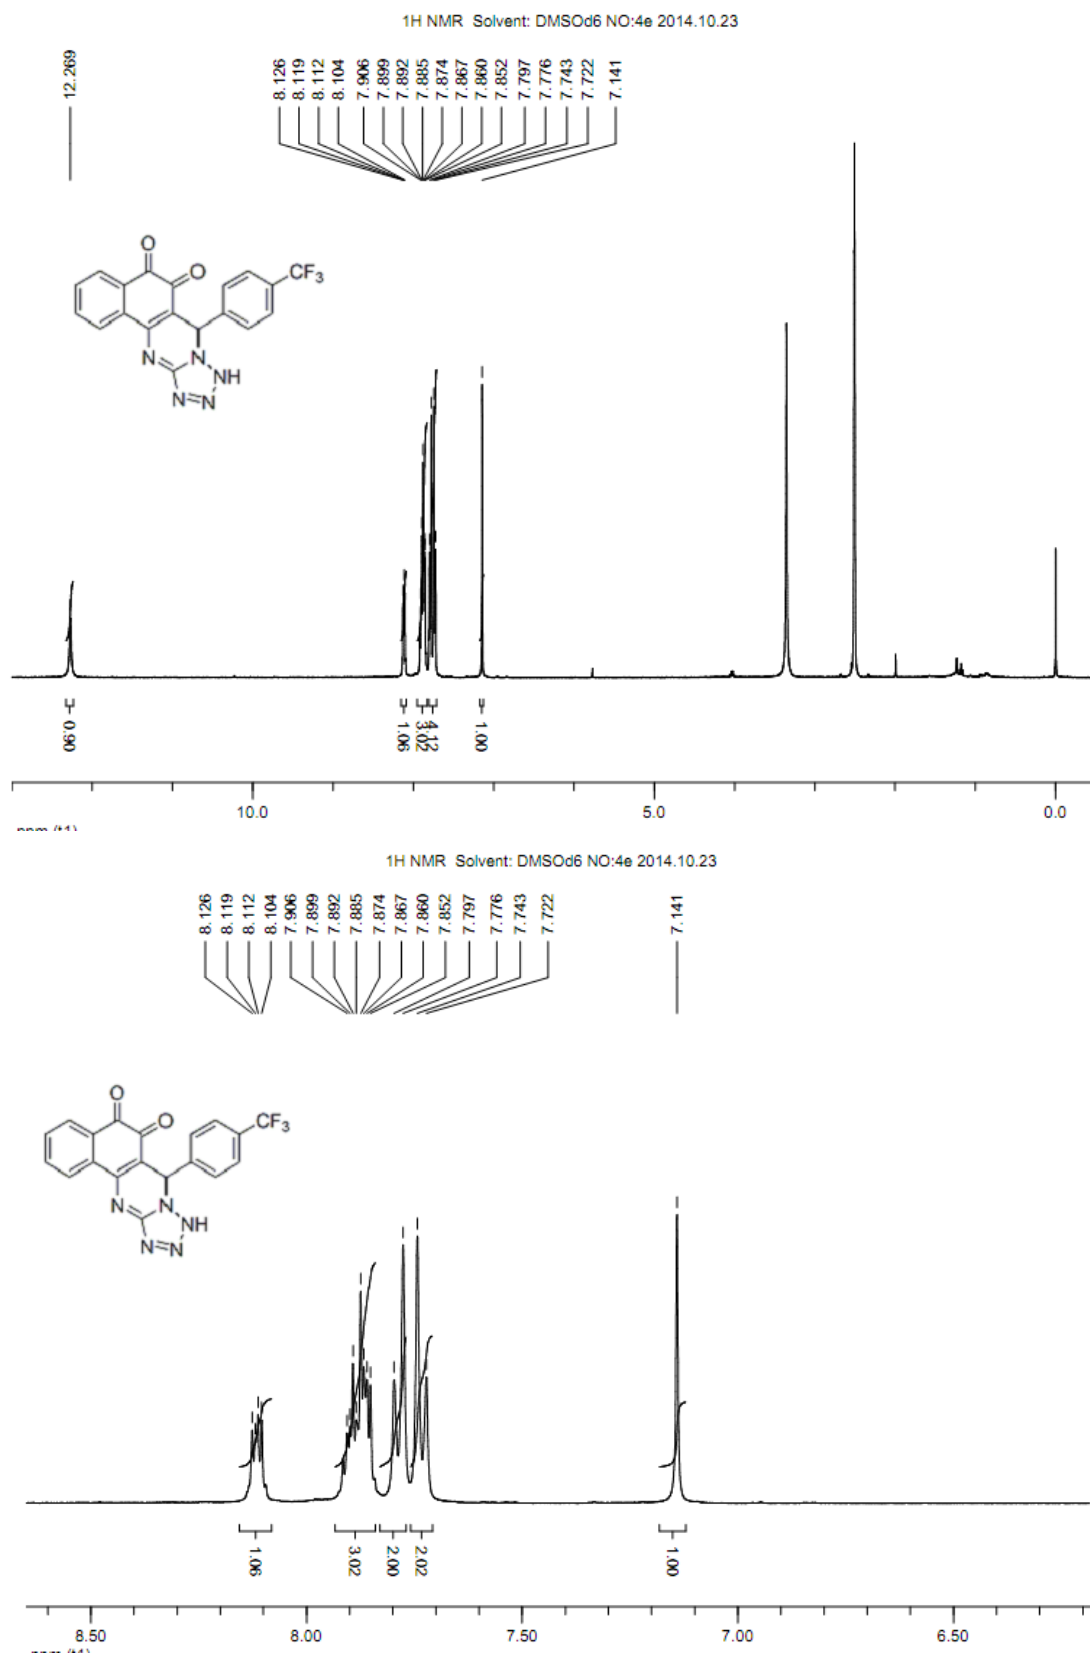

Figure 17 <sup>1</sup>H NMR of 4e

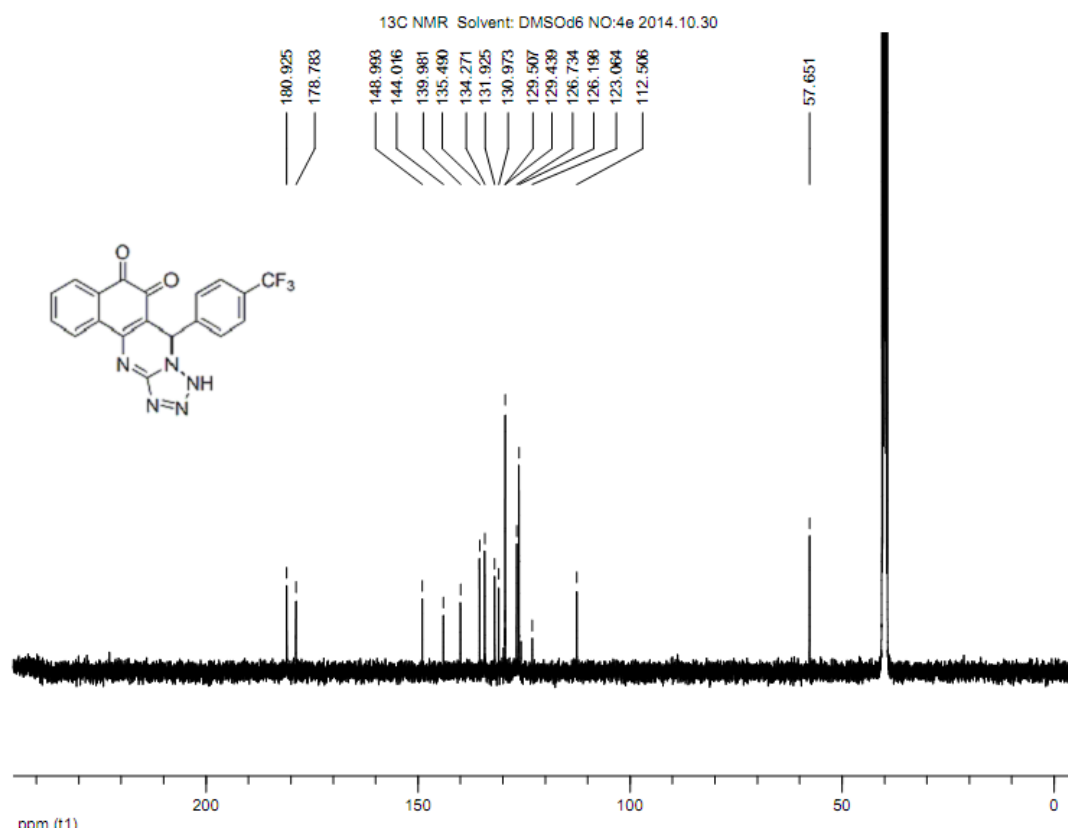

Figure 18 <sup>13</sup>C NMR of 4e

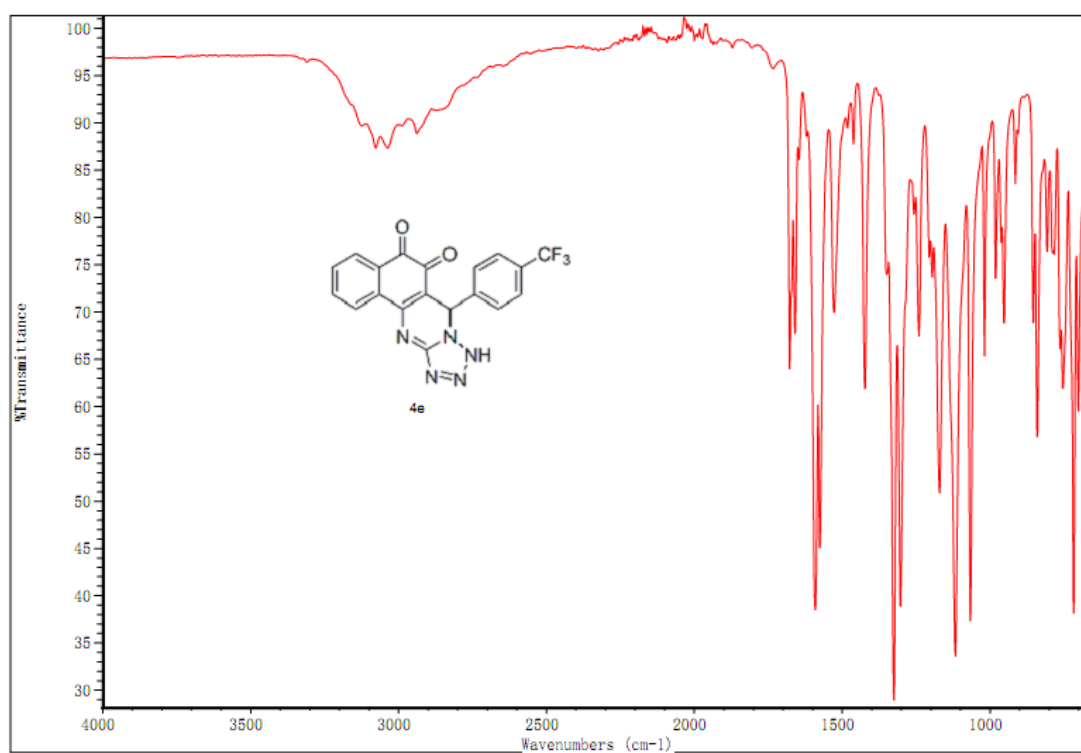

Figure 19 IR of 4e

# Display Report

## Analysis Info

Analysis Name D:\Data\wuliqiang\07.d  
Method Tune\_pos\_Standard.m  
Sample Name 07  
Comment

Acquisition Date 11/10/2014 4:21:17 PM

Operator zjx  
Instrument micrOTOF-Q III 8228888.20494

## Acquisition Parameter

|             |          |                       |           |                  |           |
|-------------|----------|-----------------------|-----------|------------------|-----------|
| Source Type | ESI      | Ion Polarity          | Positive  | Set Nebulizer    | 0.3 Bar   |
| Focus       | Active   | Set Capillary         | 4500 V    | Set Dry Heater   | 200 °C    |
| Scan Begin  | 50 m/z   | Set End Plate Offset  | -500 V    | Set Dry Gas      | 4.0 l/min |
| Scan End    | 1000 m/z | Set Collision Cell RF | 180.0 Vpp | Set Divert Valve | Waste     |

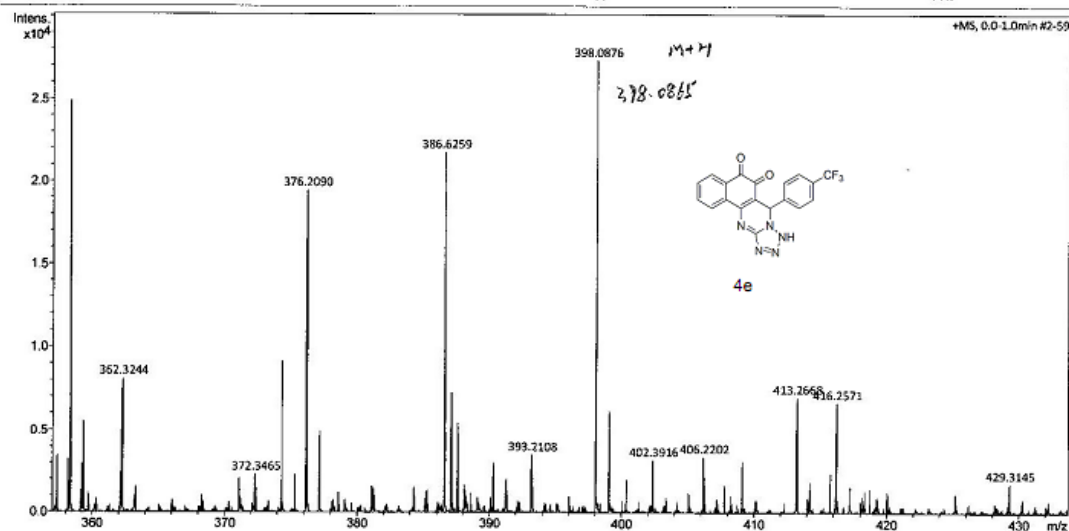

Bruker Compass DataAnalysis 4.2

printed: 11/10/2014 4:23:03 PM

by: zjx

Page 1 of 1

Figure 20 HRMS of 4e



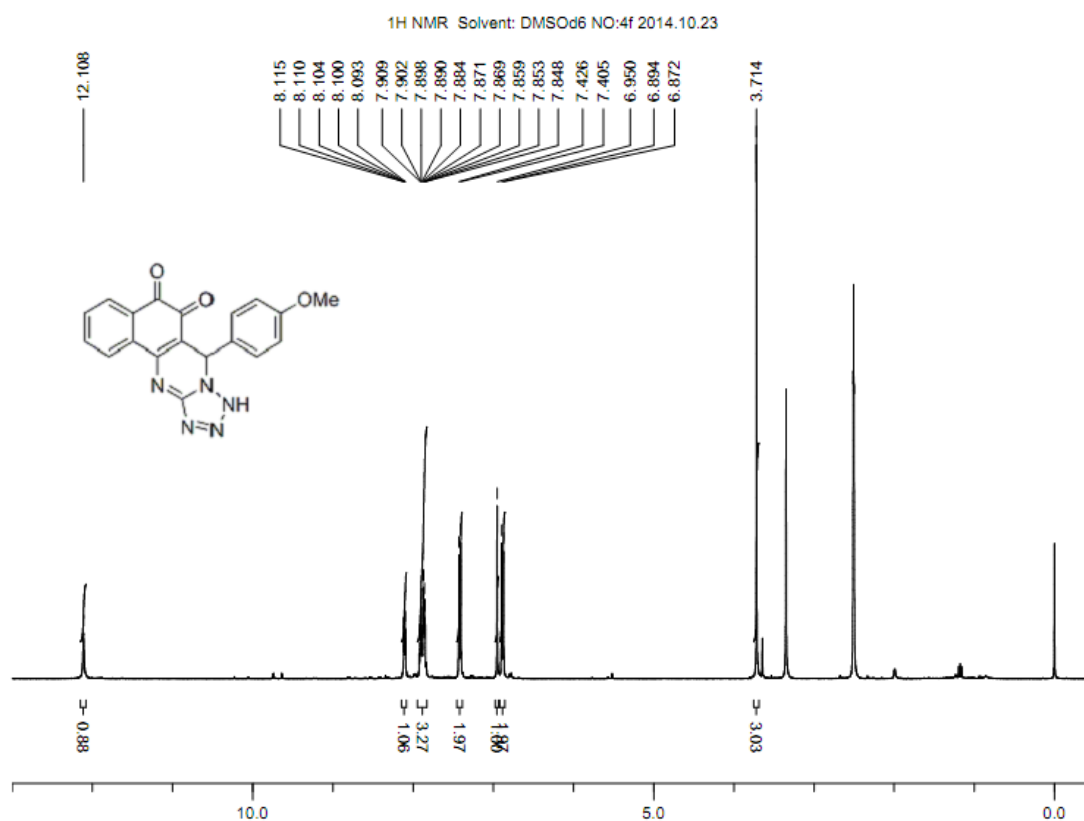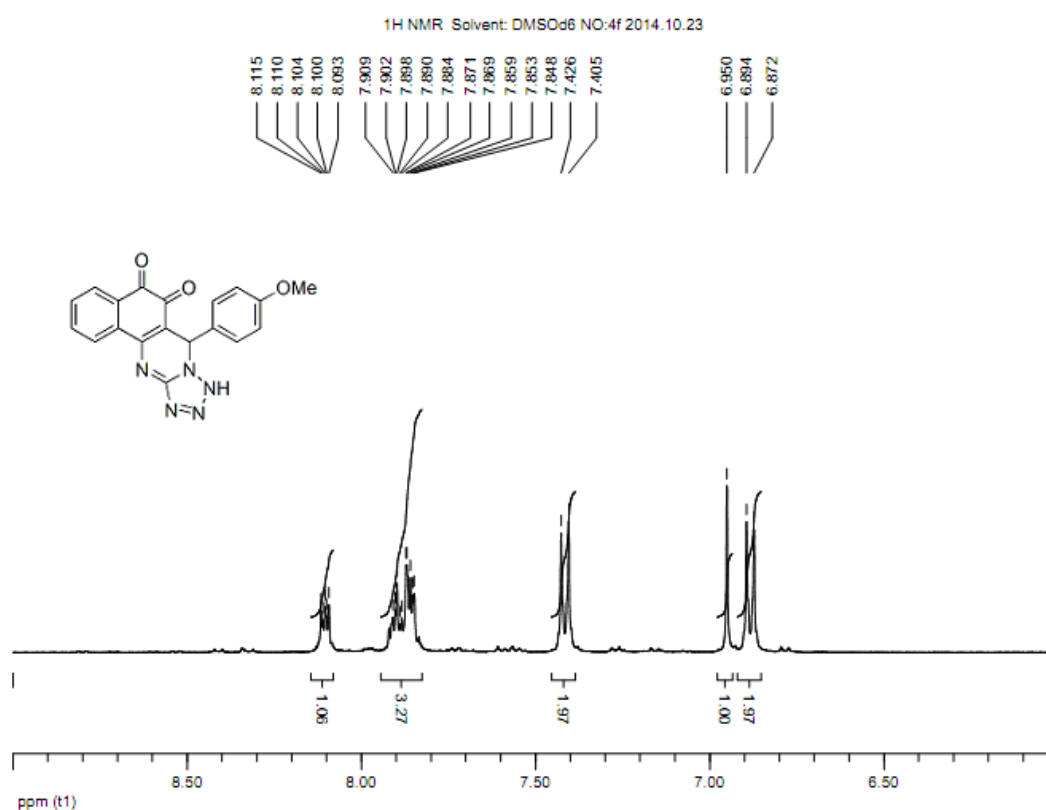

Figure 21  $^1\text{H}$  NMR of 4f

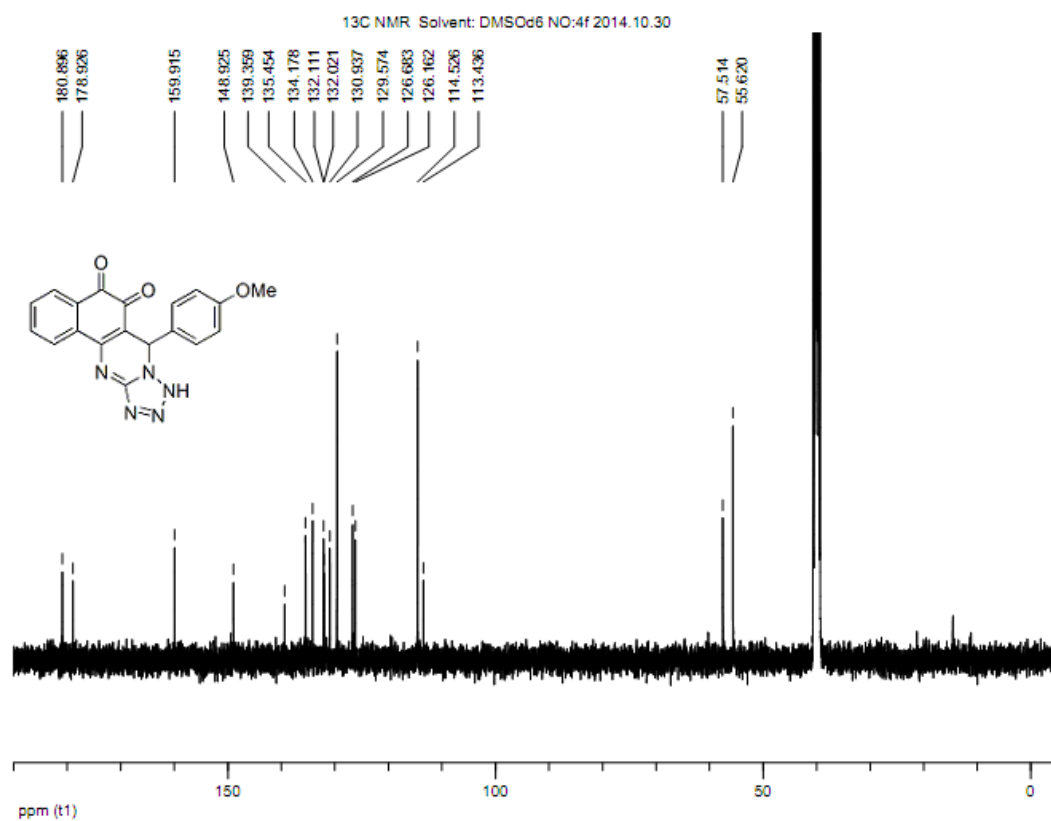

Figure 22 <sup>13</sup>C NMR of 4f

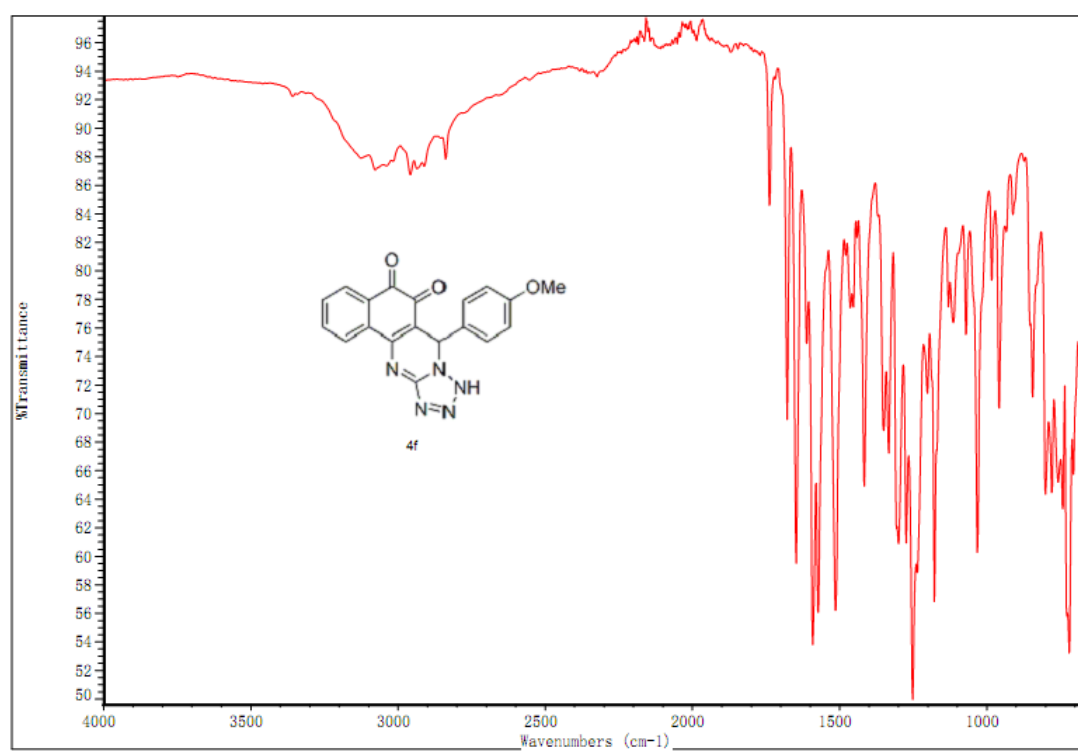

Figure 23 IR of 4f

# Display Report

**Analysis Info**  
 Analysis Name D:\Data\wuliqiang\8.d  
 Method Tune\_pos\_Standard.m  
 Sample Name 8  
 Comment

Acquisition Date 11/6/2014 10:07:00 AM  
 Operator zjx  
 Instrument micrOTOF-Q III 6228888.20494

## Acquisition Parameter

|             |          |                       |           |                  |           |
|-------------|----------|-----------------------|-----------|------------------|-----------|
| Source Type | ESI      | Ion Polarity          | Positive  | Set Nebulizer    | 0.3 Bar   |
| Focus       | Active   | Set Capillary         | 4500 V    | Set Dry Heater   | 200 °C    |
| Scan Begin  | 50 m/z   | Set End Plate Offset  | -500 V    | Set Dry Gas      | 4.0 l/min |
| Scan End    | 1000 m/z | Set Collision Cell RF | 180.0 Vpp | Set Divert Valve | Waste     |

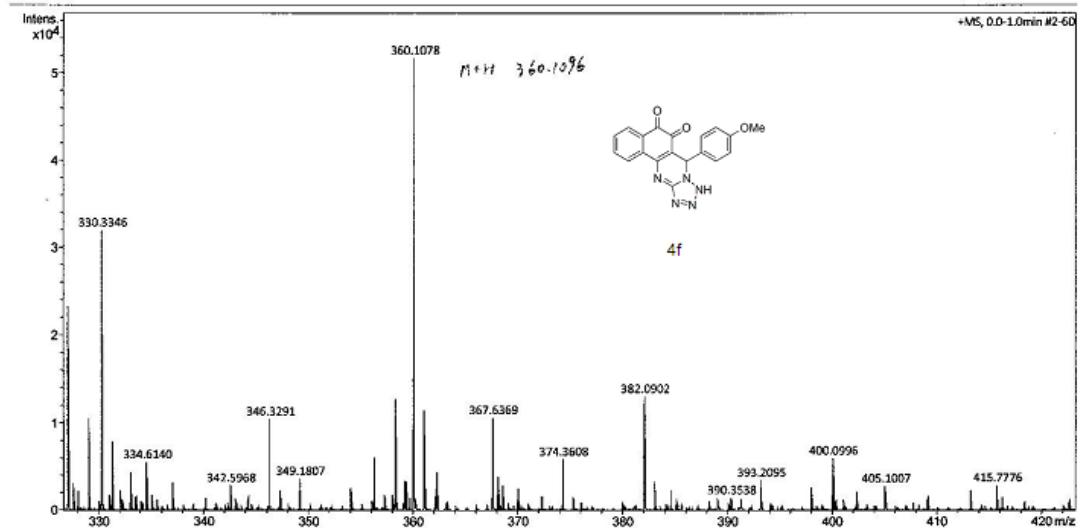

Bruker Compass DataAnalysis 4.2

printed: 11/6/2014 3:35:37 PM

by: zjx

Page 1 of 1

Figure 24 HRMS of 4f

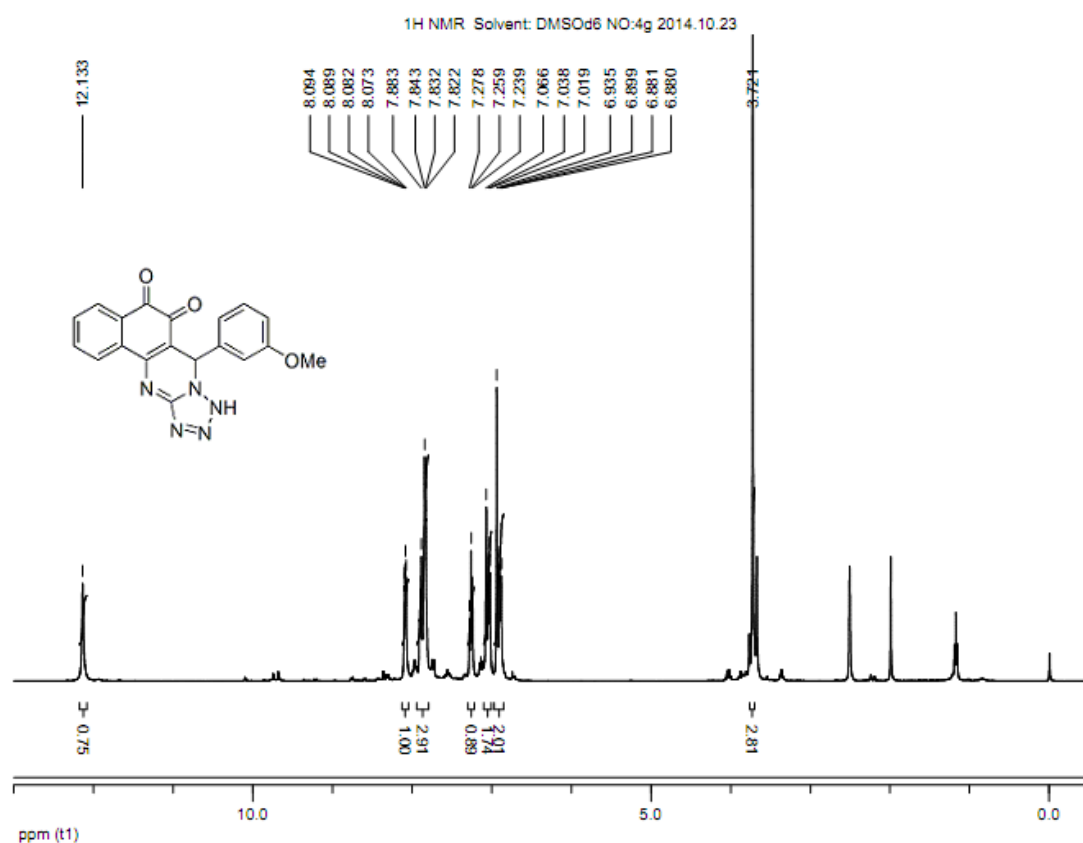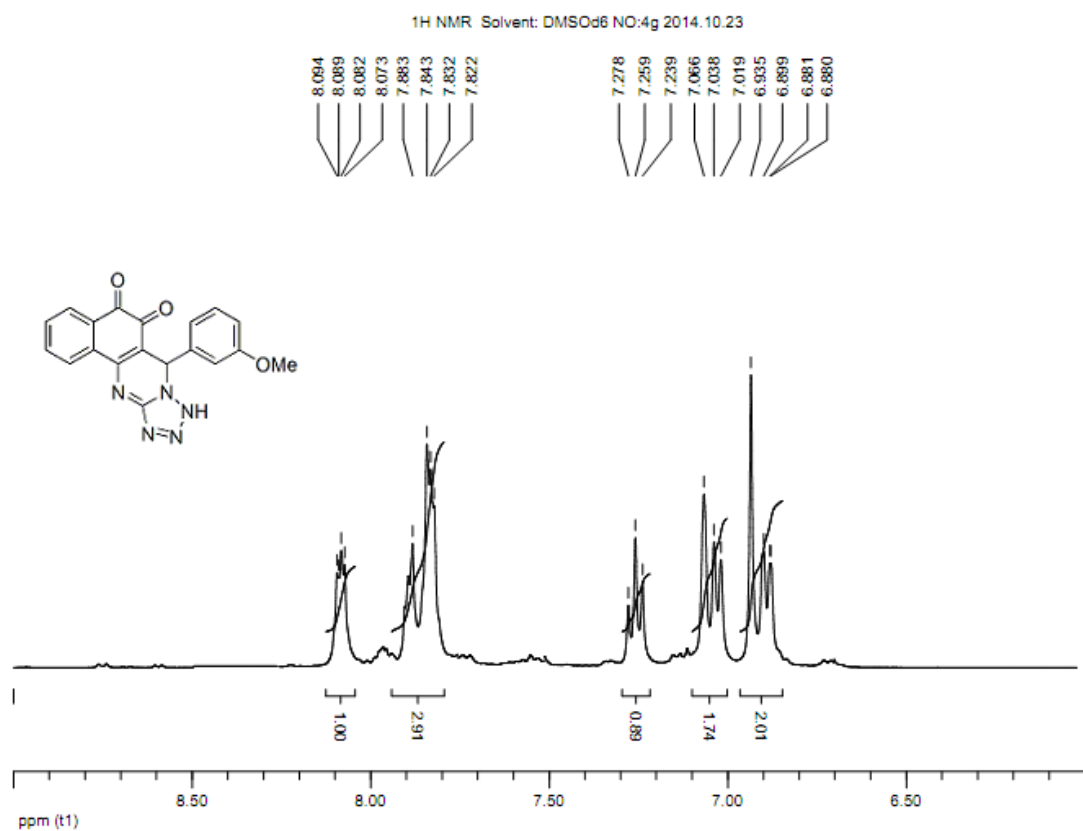

**Figure 25**  $^1\text{H}$  NMR of 4g

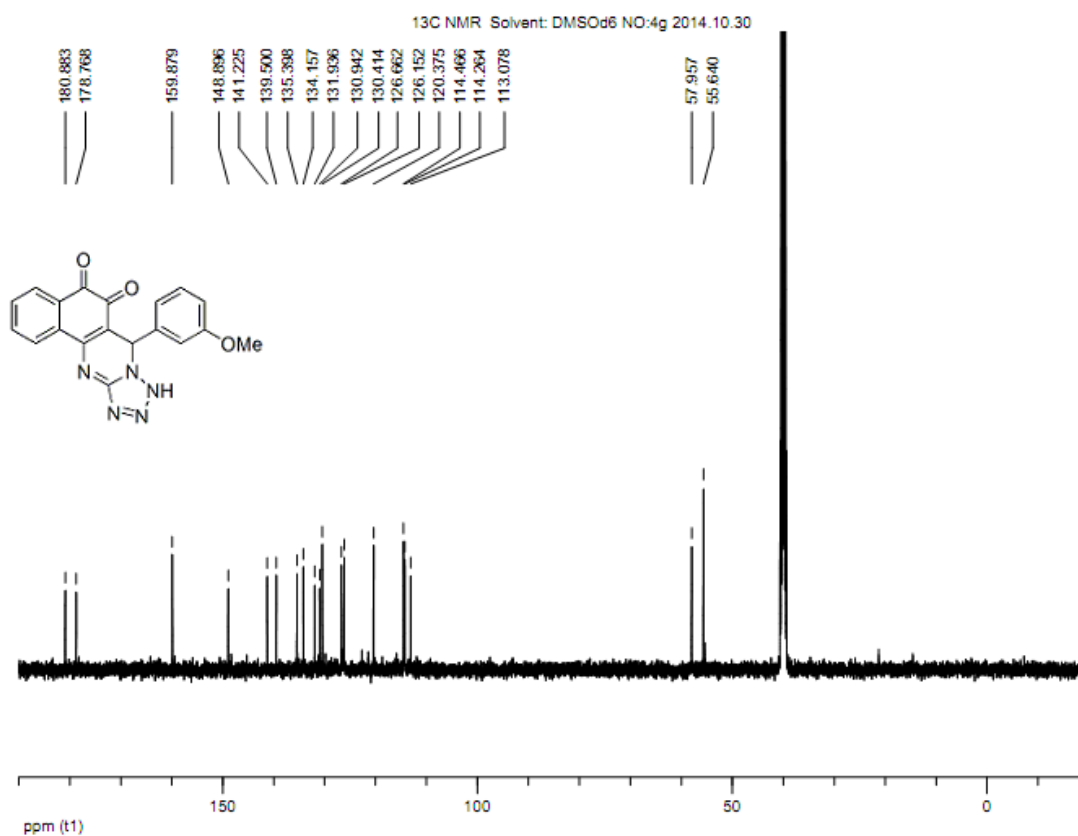

Figure 26 <sup>13</sup>C NMR of 4g

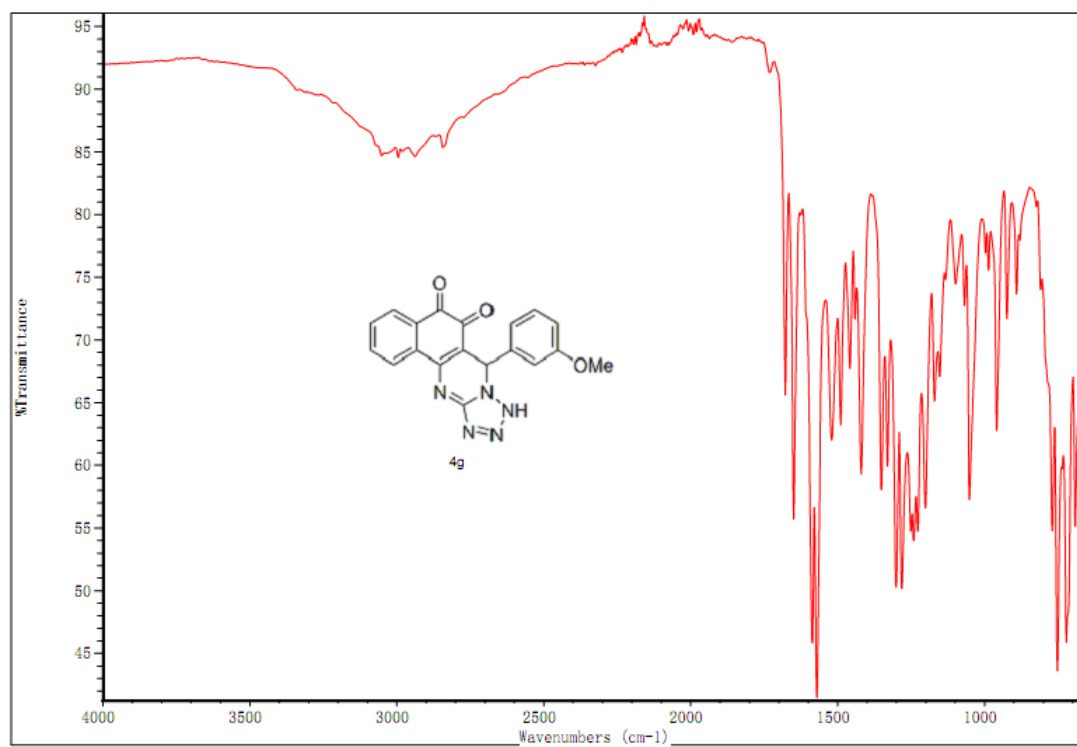

Figure 27 IR of 4g

## Display Report

|                      |                          |                  |                |                       |  |
|----------------------|--------------------------|------------------|----------------|-----------------------|--|
| <b>Analysis Info</b> |                          | Acquisition Date |                | 11/10/2014 5:49:03 PM |  |
| Analysis Name        | D:\Data\wuliqiang\025a.d | Operator         | zjx            |                       |  |
| Method               | Tune_pos_Standard.m      | Instrument       | microTOF-Q III |                       |  |
| Sample Name          | 025a                     |                  | 8228888.20494  |                       |  |
| Comment              |                          |                  |                |                       |  |

|                              |          |                       |           |                  |           |
|------------------------------|----------|-----------------------|-----------|------------------|-----------|
| <b>Acquisition Parameter</b> |          |                       |           |                  |           |
| Source Type                  | ESI      | Ion Polarity          | Positive  | Set Nebulizer    | 0.3 Bar   |
| Focus                        | Active   | Set Capillary         | 4500 V    | Set Dry Heater   | 200 °C    |
| Scan Begin                   | 50 m/z   | Set End Plate Offset  | -500 V    | Set Dry Gas      | 4.0 l/min |
| Scan End                     | 1000 m/z | Set Collision Cell RF | 180.0 Vpp | Set Divert Valve | Waste     |

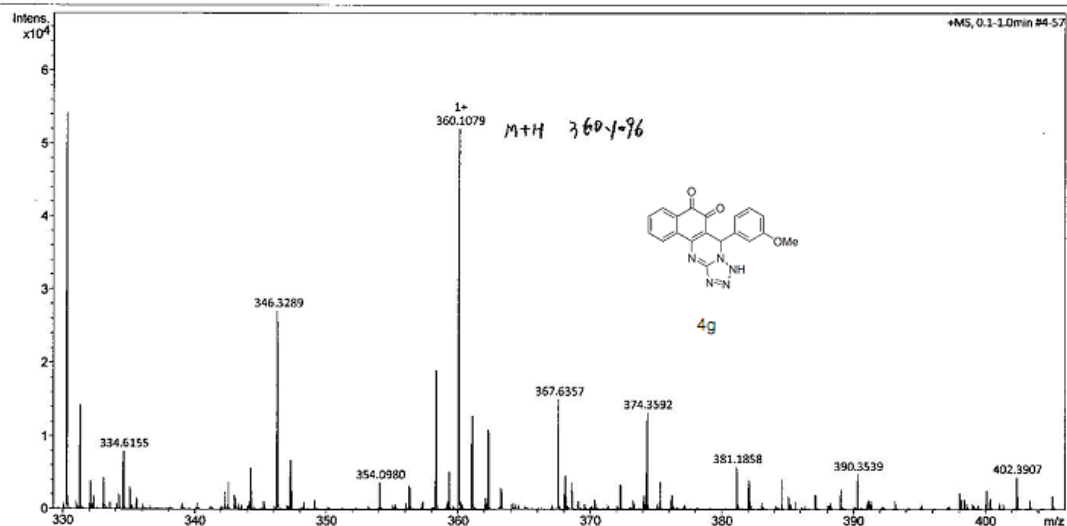

Bruker Compass DataAnalysis 4.2

printed: 11/10/2014 5:50:53 PM

by: zjx

Page 1 of 1

**Figure 28 HRMS of 4g**

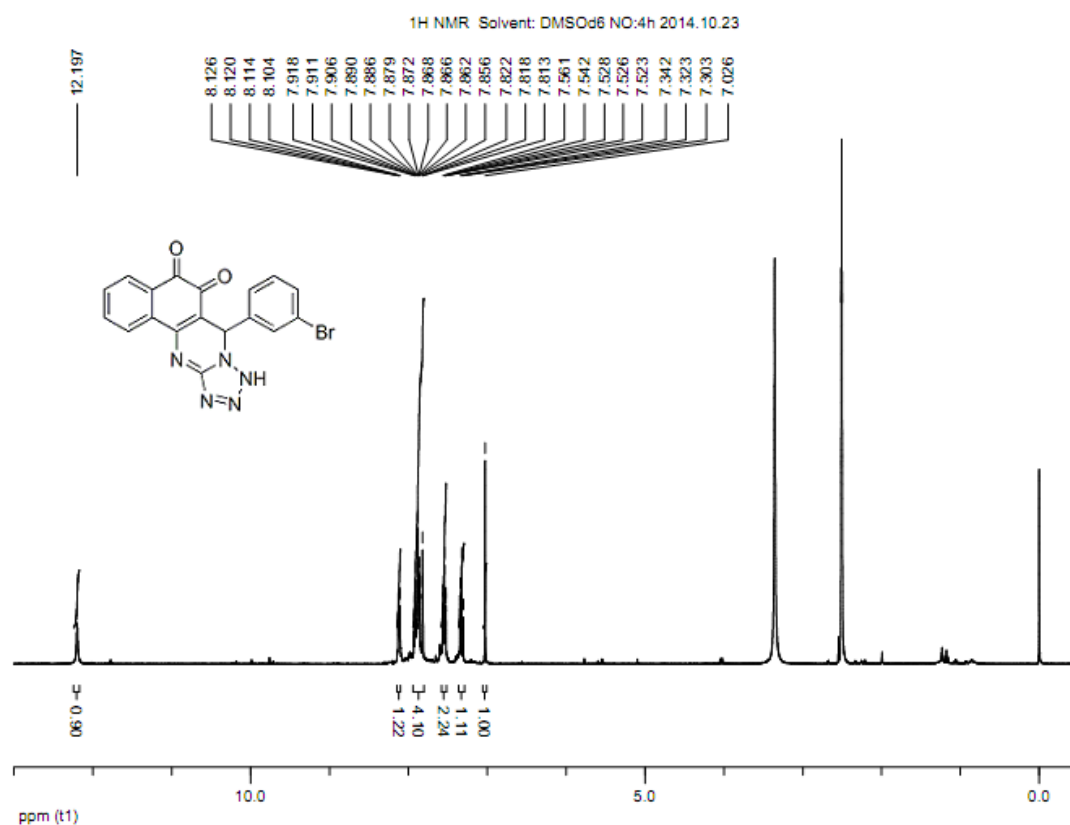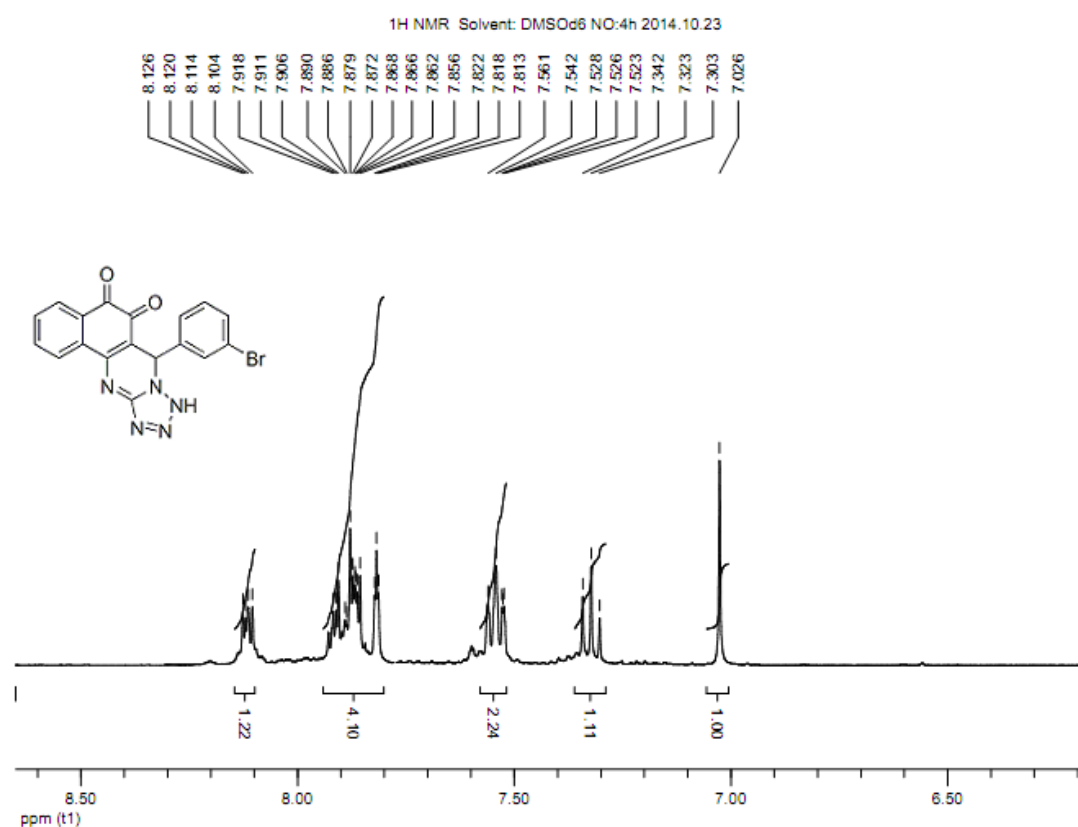

Figure 29 <sup>1</sup>H NMR of 4h

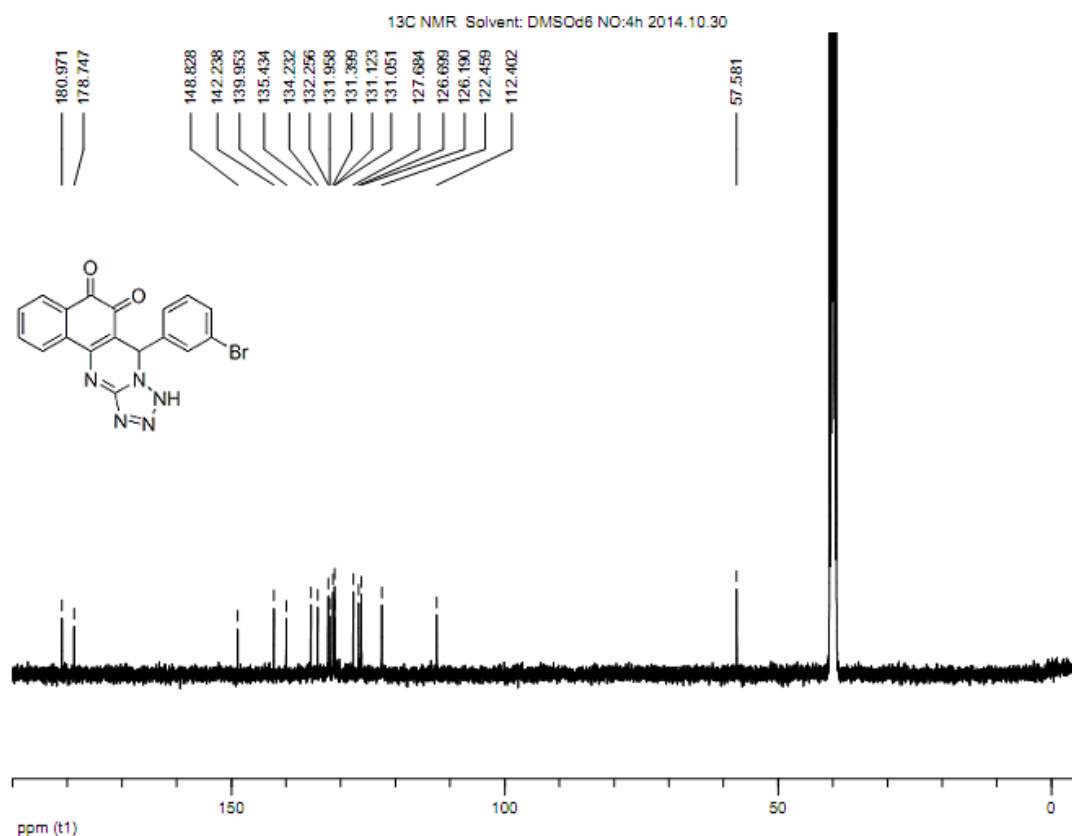

Figure 30  $^{13}\text{C}$  NMR of 4h

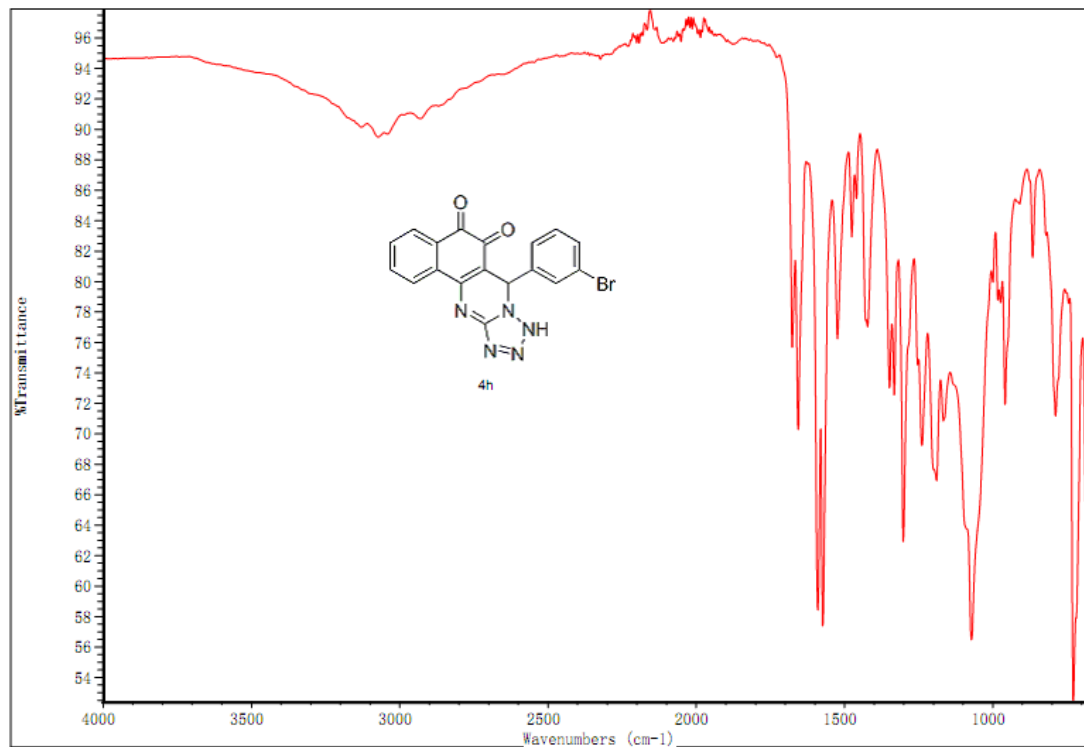

Figure 31 IR of 4h



## Display Report

|                      |                       |                                               |                |
|----------------------|-----------------------|-----------------------------------------------|----------------|
| <b>Analysis Info</b> |                       | <b>Acquisition Date</b> 11/6/2014 10:10:06 AM |                |
| <b>Analysis Name</b> | D:\Data\wuliqiang\9.d | <b>Operator</b>                               | zjx            |
| <b>Method</b>        | Tune_pos_Standard.m   | <b>Instrument</b>                             | micrOTOF-Q III |
| <b>Sample Name</b>   | 9                     |                                               | 8228888.20494  |
| <b>Comment</b>       |                       |                                               |                |

|                              |          |                       |           |                  |           |
|------------------------------|----------|-----------------------|-----------|------------------|-----------|
| <b>Acquisition Parameter</b> |          |                       |           |                  |           |
| Source Type                  | ESI      | Ion Polarity          | Positive  | Set Nebulizer    | 0.3 Bar   |
| Focus                        | Active   | Set Capillary         | 4500 V    | Set Dry Heater   | 200 °C    |
| Scan Begin                   | 50 m/z   | Set End Plate Offset  | -500 V    | Set Dry Gas      | 4.0 l/min |
| Scan End                     | 1000 m/z | Set Collision Cell RF | 180.0 Vpp | Set Divert Valve | Waste     |

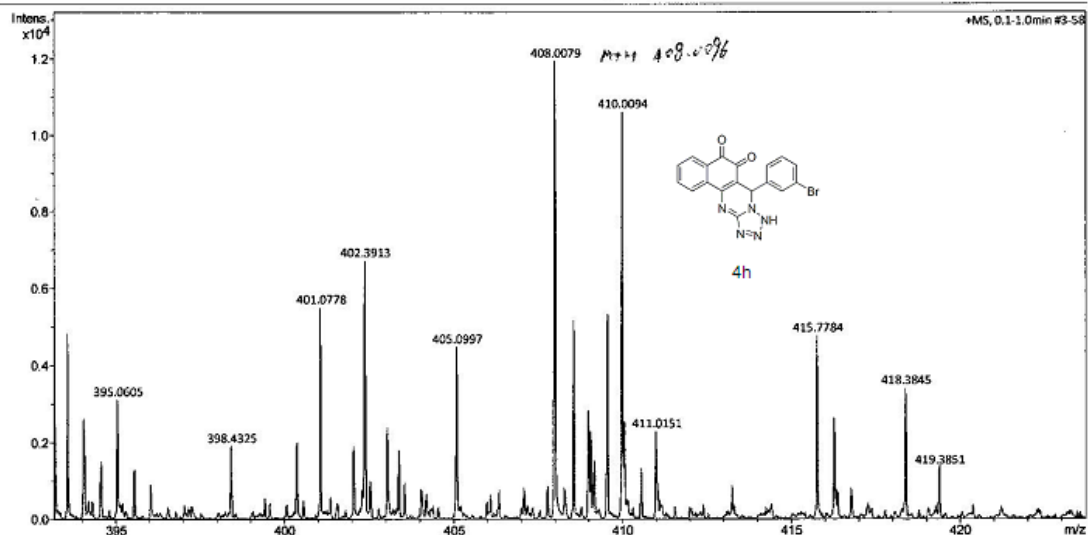

Bruker Compass DataAnalysis 4.2

printed: 11/6/2014 3:36:28 PM

by: zjx

Page 1 of 1

**Figure 32 HRMS of 4h**

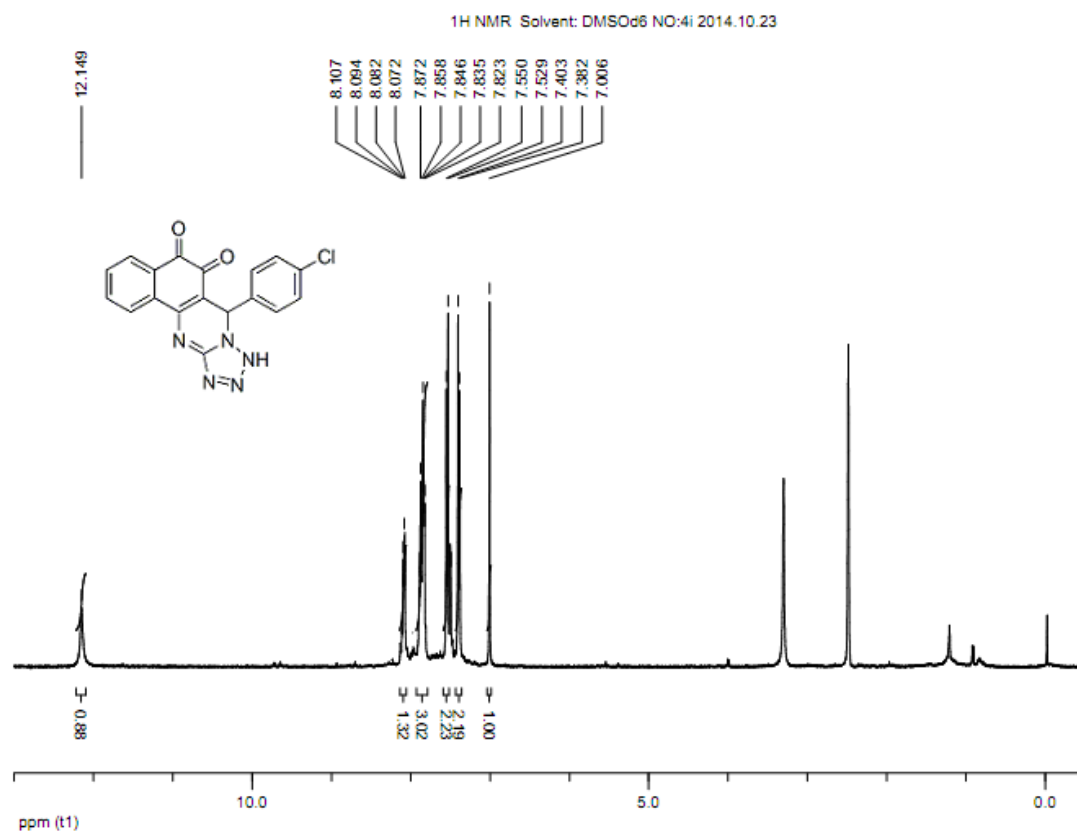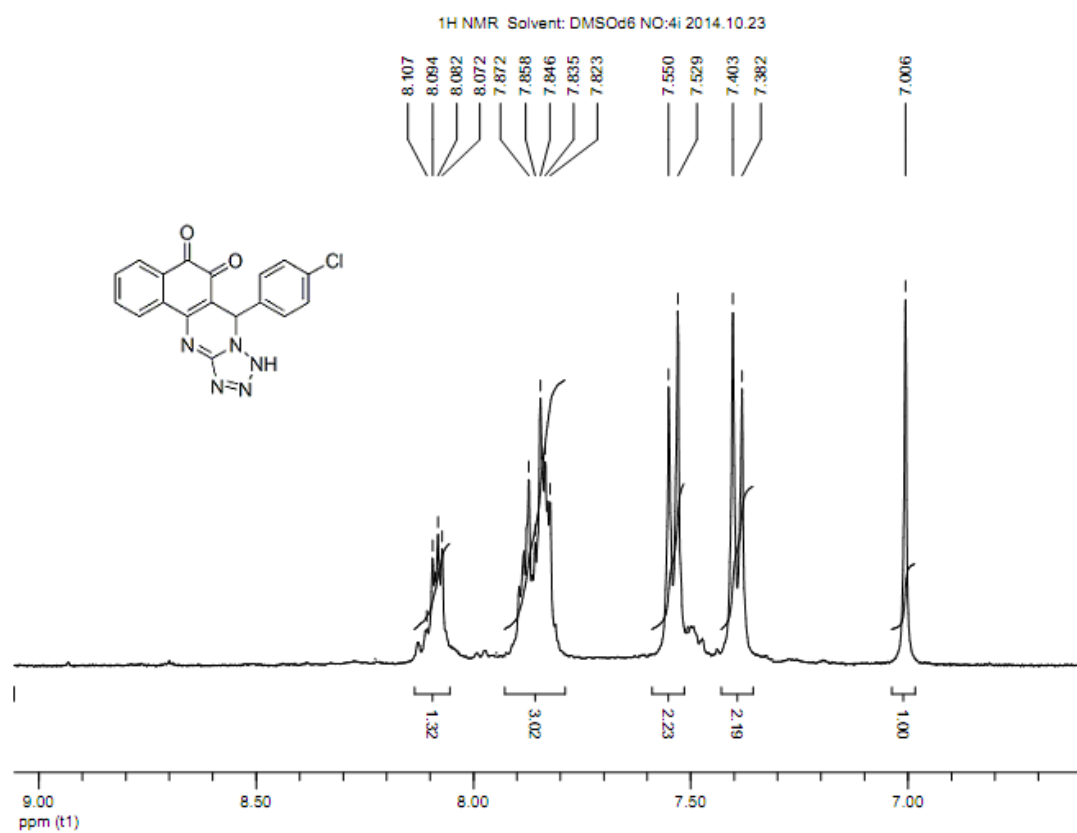

Figure 33 <sup>1</sup>H NMR of 4i

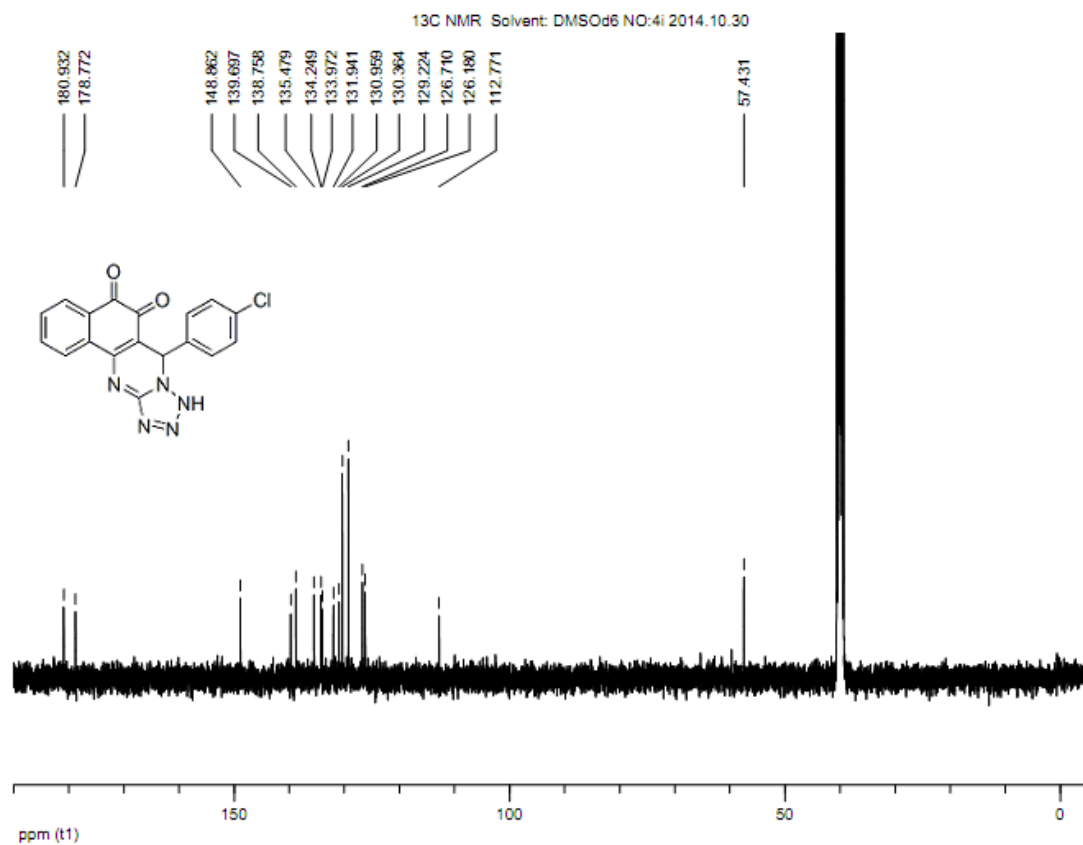

Figure 34 <sup>13</sup>C NMR of 4i

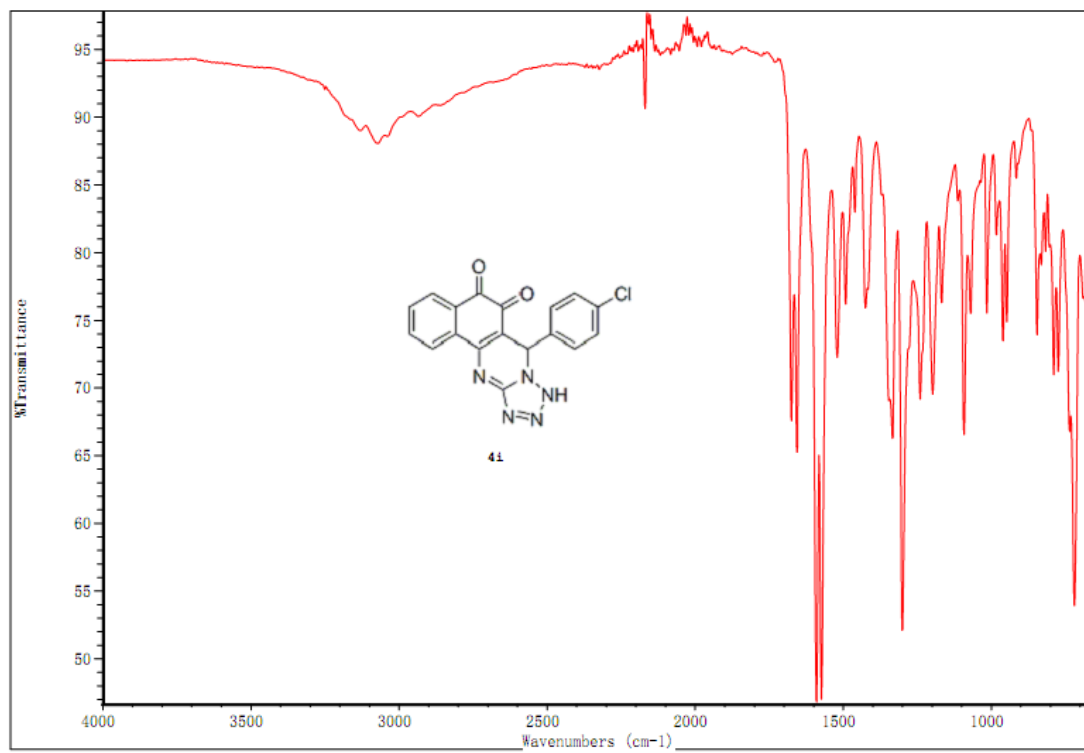

Figure 35 IR of 4i

# Display Report

|                      |                        |                                               |                |
|----------------------|------------------------|-----------------------------------------------|----------------|
| <b>Analysis Info</b> |                        | <b>Acquisition Date</b> 11/6/2014 10:17:17 AM |                |
| Analysis Name        | D:\Data\wuliqiang\11.d | Operator                                      | zjx            |
| Method               | Tune_pos_Standard.m    | Instrument                                    | micrOTOF-Q III |
| Sample Name          | 11                     |                                               | 8228888.20494  |
| Comment              |                        |                                               |                |

|                              |          |                       |           |                  |           |
|------------------------------|----------|-----------------------|-----------|------------------|-----------|
| <b>Acquisition Parameter</b> |          |                       |           |                  |           |
| Source Type                  | ESI      | Ion Polarity          | Positive  | Set Nebulizer    | 0.3 Bar   |
| Focus                        | Active   | Set Capillary         | 4500 V    | Set Dry Heater   | 200 °C    |
| Scan Begin                   | 50 m/z   | Set End Plate Offset  | -500 V    | Set Dry Gas      | 4.0 l/min |
| Scan End                     | 1000 m/z | Set Collision Cell RF | 180.0 Vpp | Set Divert Valve | Waste     |

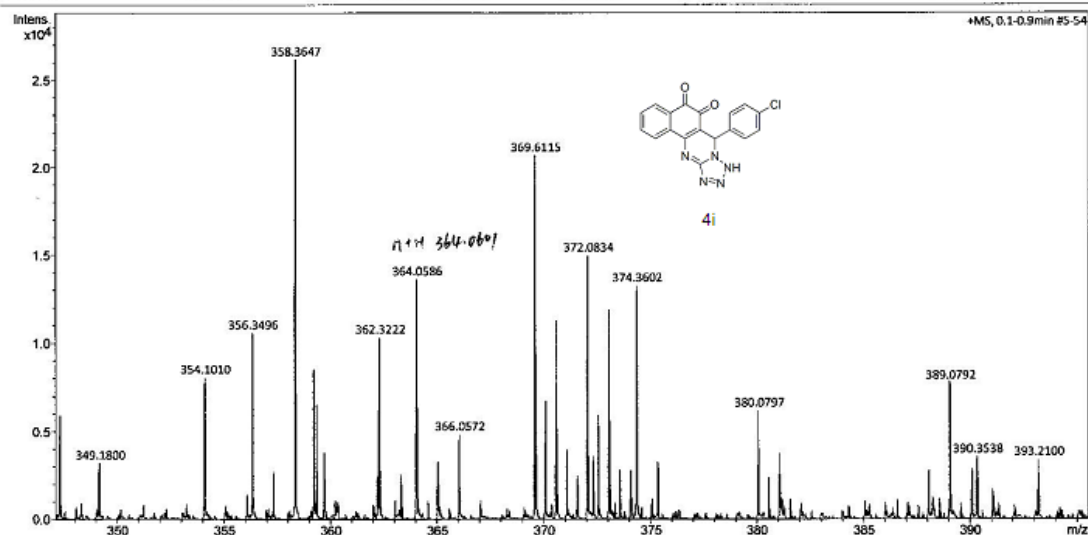

Bruker Compass DataAnalysis 4.2      printed: 11/6/2014 3:38:06 PM      by: zjx      Page 1 of 1

**Figure 36** HRMS of **4i**

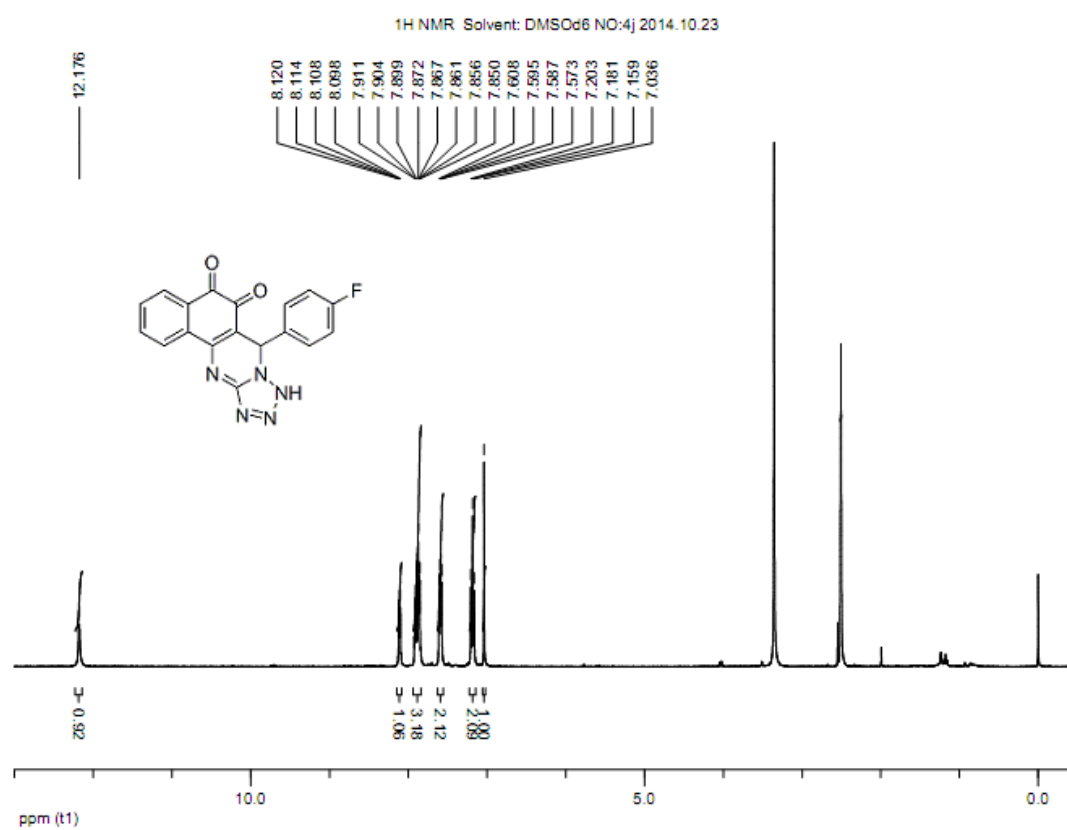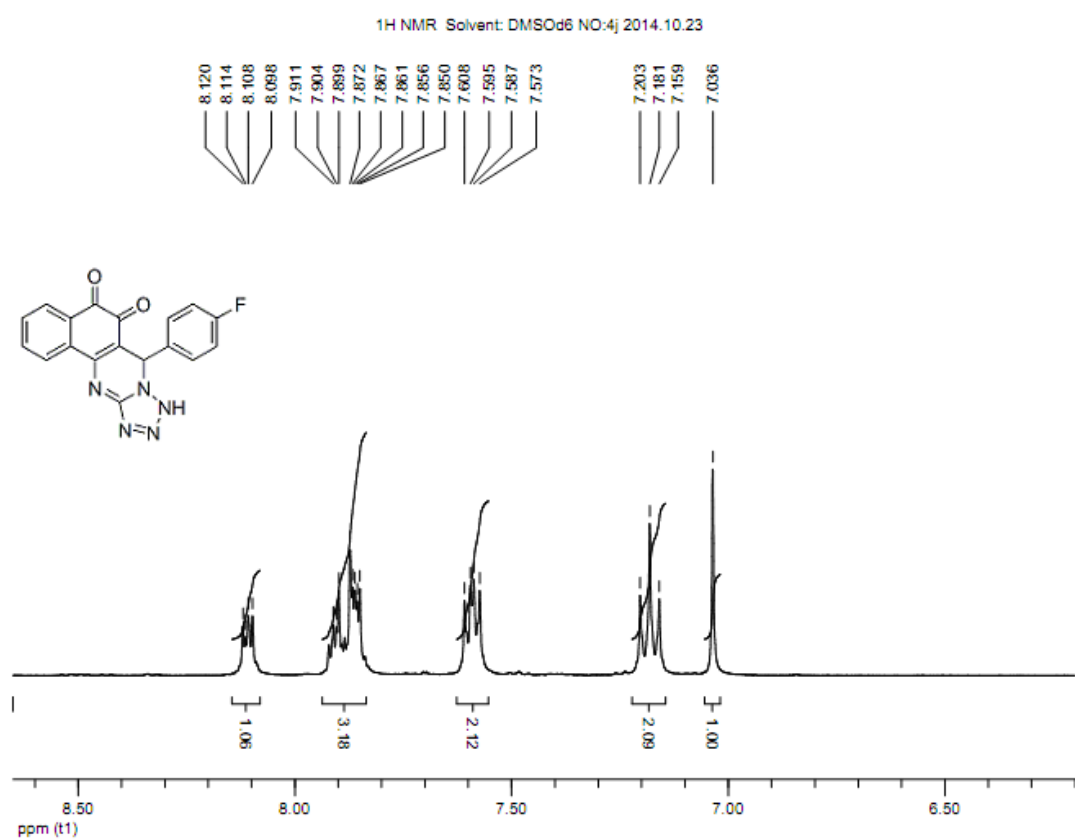

Figure 37 <sup>1</sup>H NMR of 4j

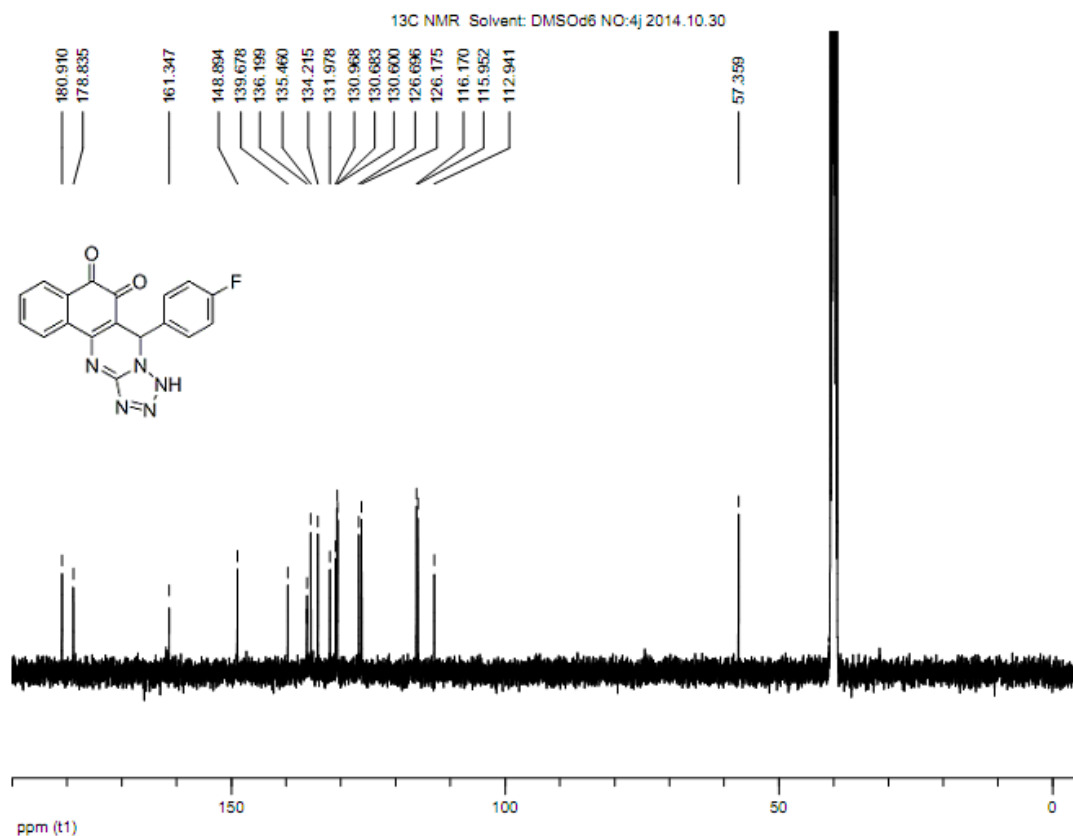

Figure 38 <sup>13</sup>C NMR of 4j

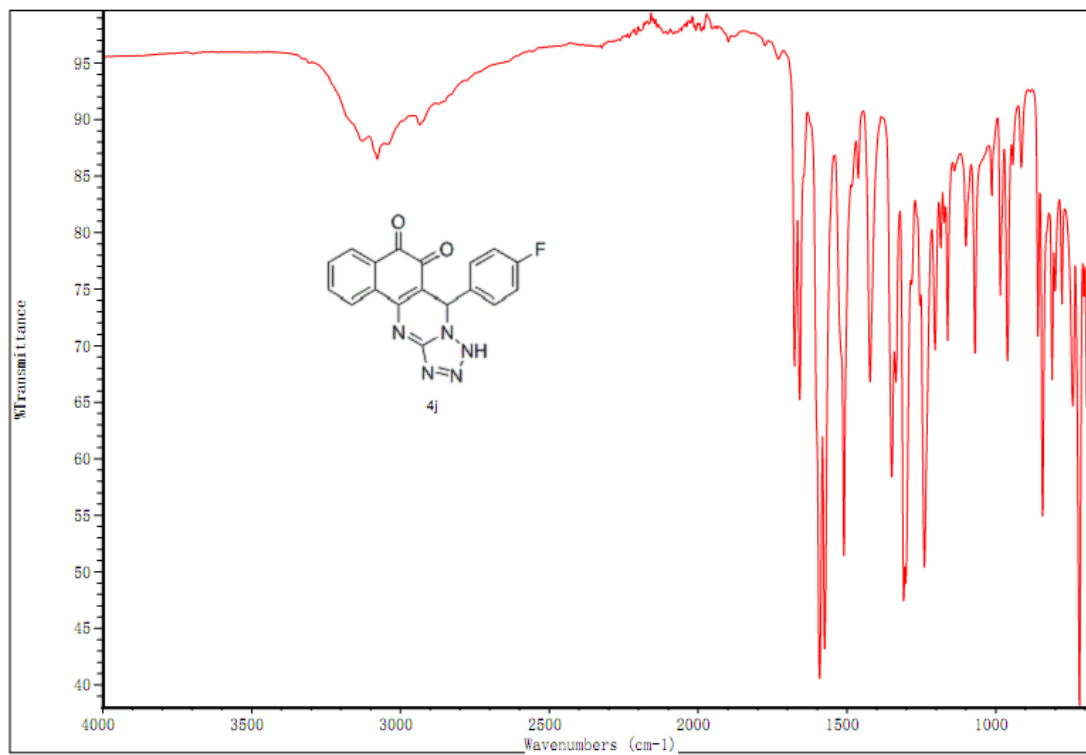

Figure 39 IR of 4j

## Display Report

|                      |                        |                                               |                |
|----------------------|------------------------|-----------------------------------------------|----------------|
| <b>Analysis Info</b> |                        | <b>Acquisition Date</b> 11/10/2014 5:36:30 PM |                |
| Analysis Name        | D:\Data\wulqiang\021.d | Operator                                      | zjx            |
| Method               | Tune_pos_Standard.m    | Instrument                                    | micrOTOF-Q III |
| Sample Name          | 021                    |                                               | 8228888.20494  |
| Comment              |                        |                                               |                |

### Acquisition Parameter

|             |          |                       |           |                  |           |
|-------------|----------|-----------------------|-----------|------------------|-----------|
| Source Type | ESI      | Ion Polarity          | Positive  | Set Nebulizer    | 0.3 Bar   |
| Focus       | Active   | Set Capillary         | 4500 V    | Set Dry Heater   | 200 °C    |
| Scan Begin  | 50 m/z   | Set End Plate Offset  | -500 V    | Set Dry Gas      | 4.0 l/min |
| Scan End    | 1000 m/z | Set Collision Cell RF | 180.0 Vpp | Set Divert Valve | Waste     |

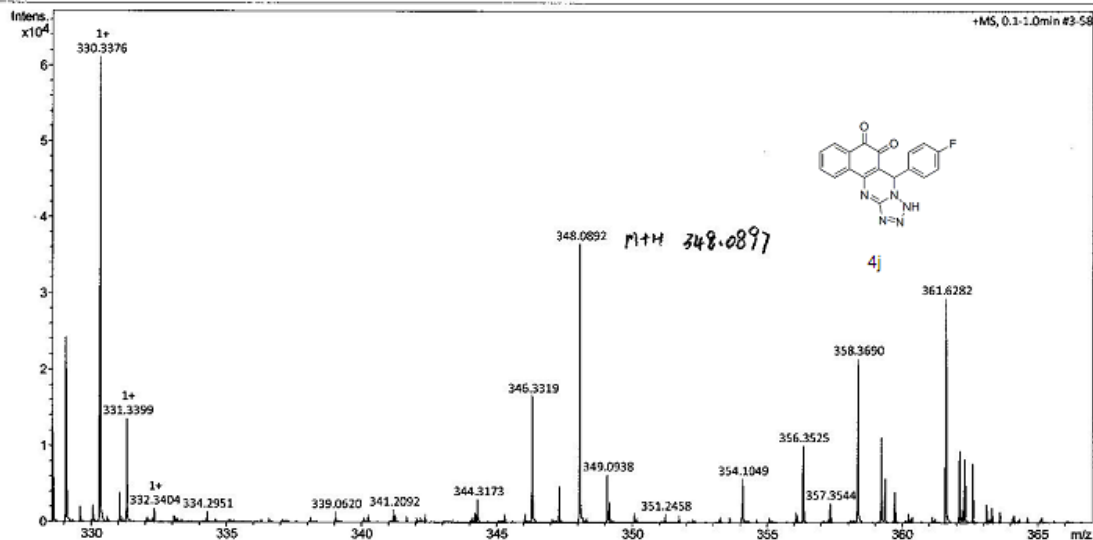

Bruker Compass DataAnalysis 4.2

printed: 11/10/2014 5:38:56 PM

by: zjx

Page 1 of 1

**Figure 40 HRMS of 4j**

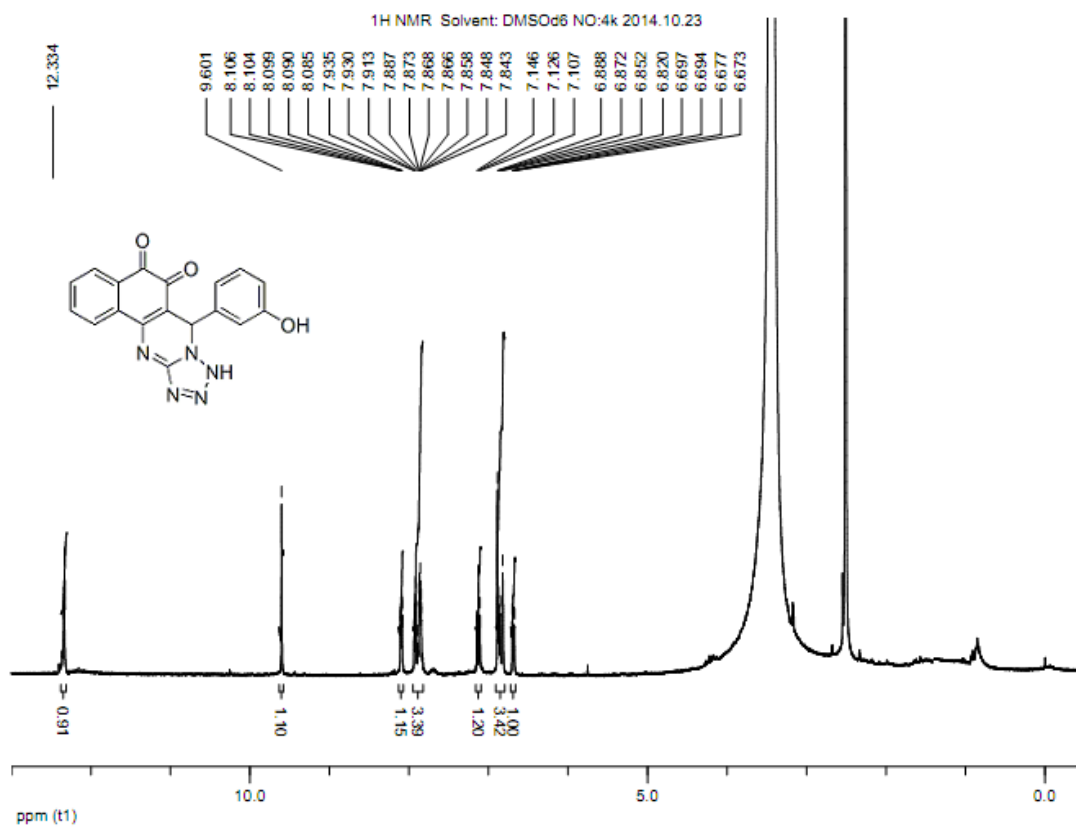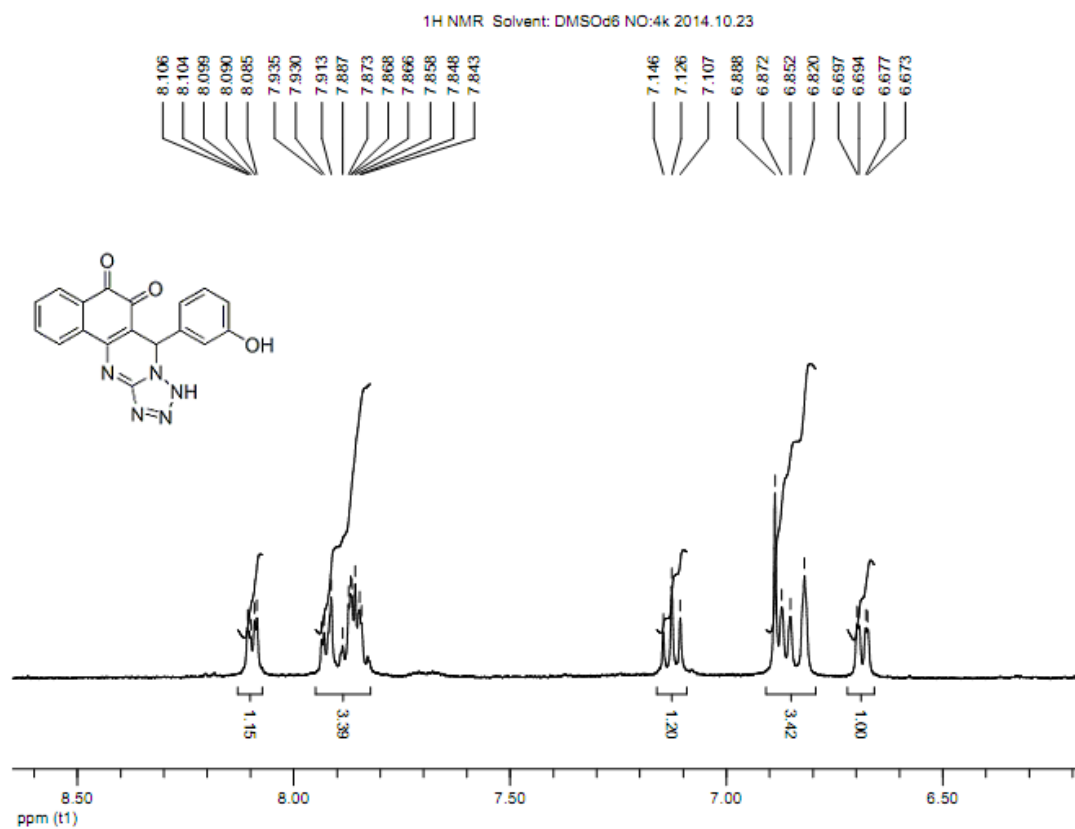

Figure 41 <sup>1</sup>H NMR of 4k



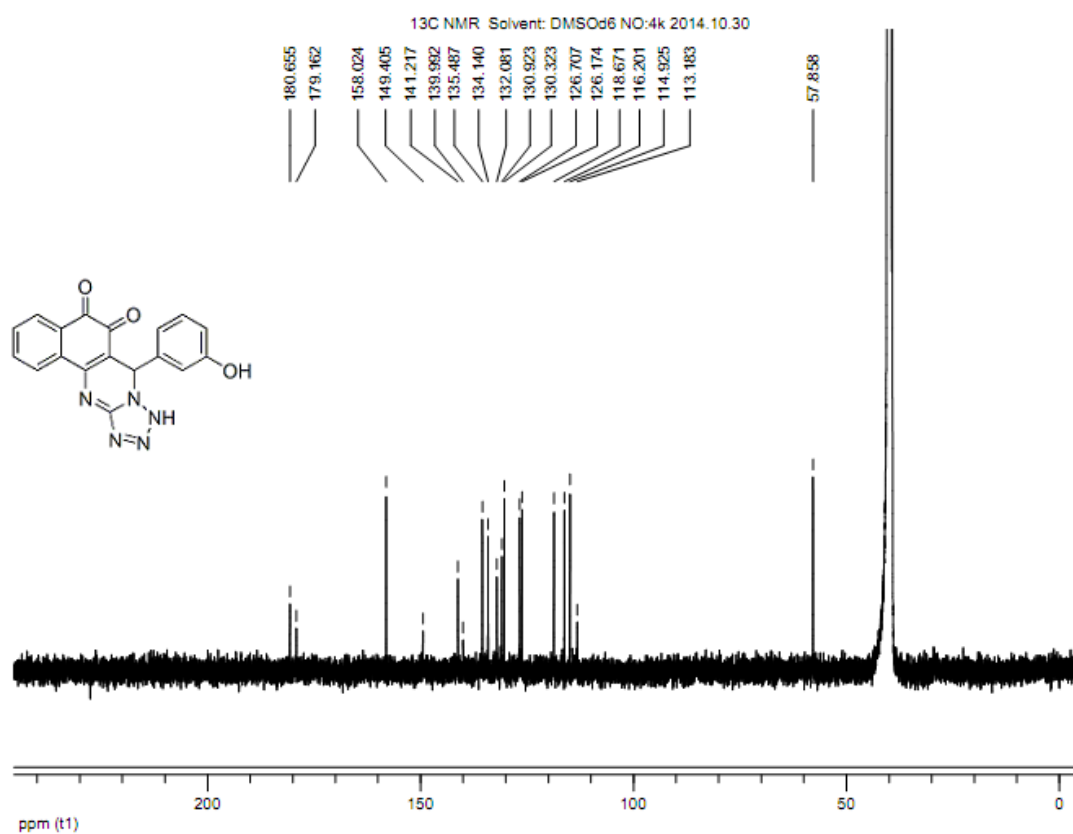

Figure 42 <sup>13</sup>C NMR of 4k

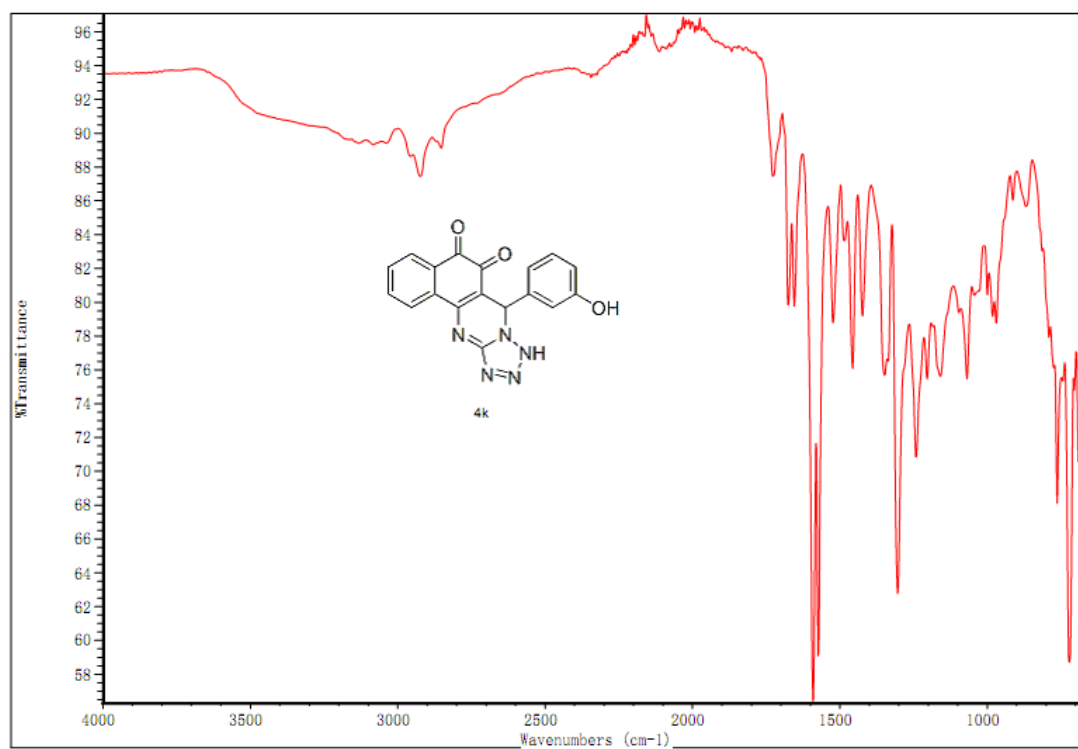

Figure 43 IR of 4k

## Display Report

|                      |                        |                                        |                |
|----------------------|------------------------|----------------------------------------|----------------|
| <b>Analysis Info</b> |                        | Acquisition Date 11/6/2014 10:29:34 AM |                |
| Analysis Name        | D:\Data\wuliqiang\15.d | Operator                               | zjx            |
| Method               | Tune_pos_Standard.m    | Instrument                             | micrOTOF-Q III |
| Sample Name          | 15                     |                                        | 8228888.20494  |
| Comment              |                        |                                        |                |

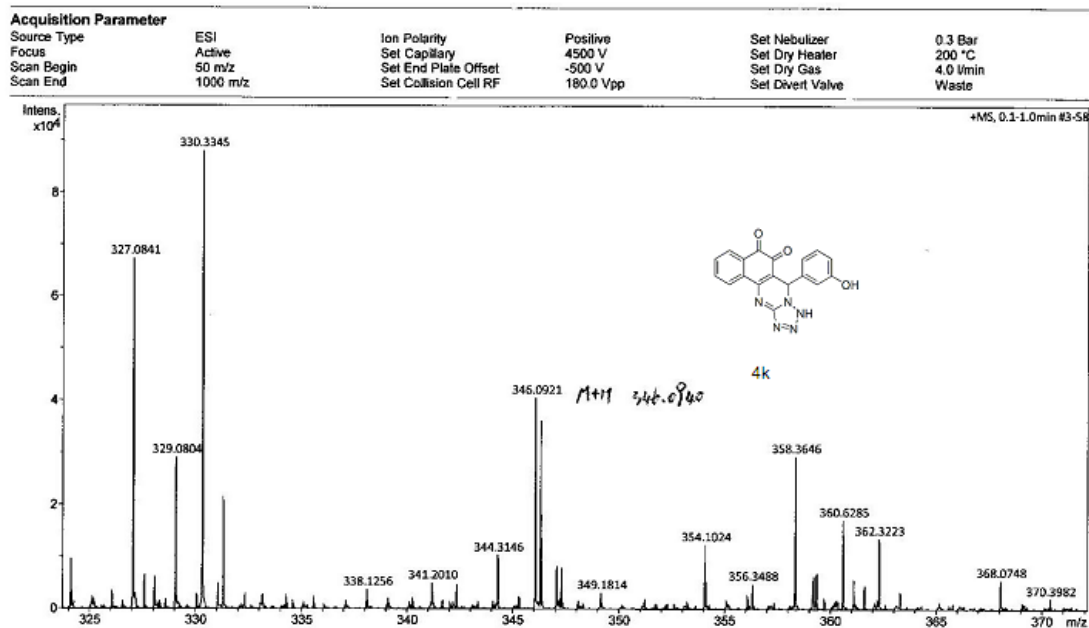

Bruker Compass DataAnalysis 4.2      printed: 11/6/2014 3:41:14 PM      by: zjx      Page 1 of 1

**Figure 44** HRMS of **4k**



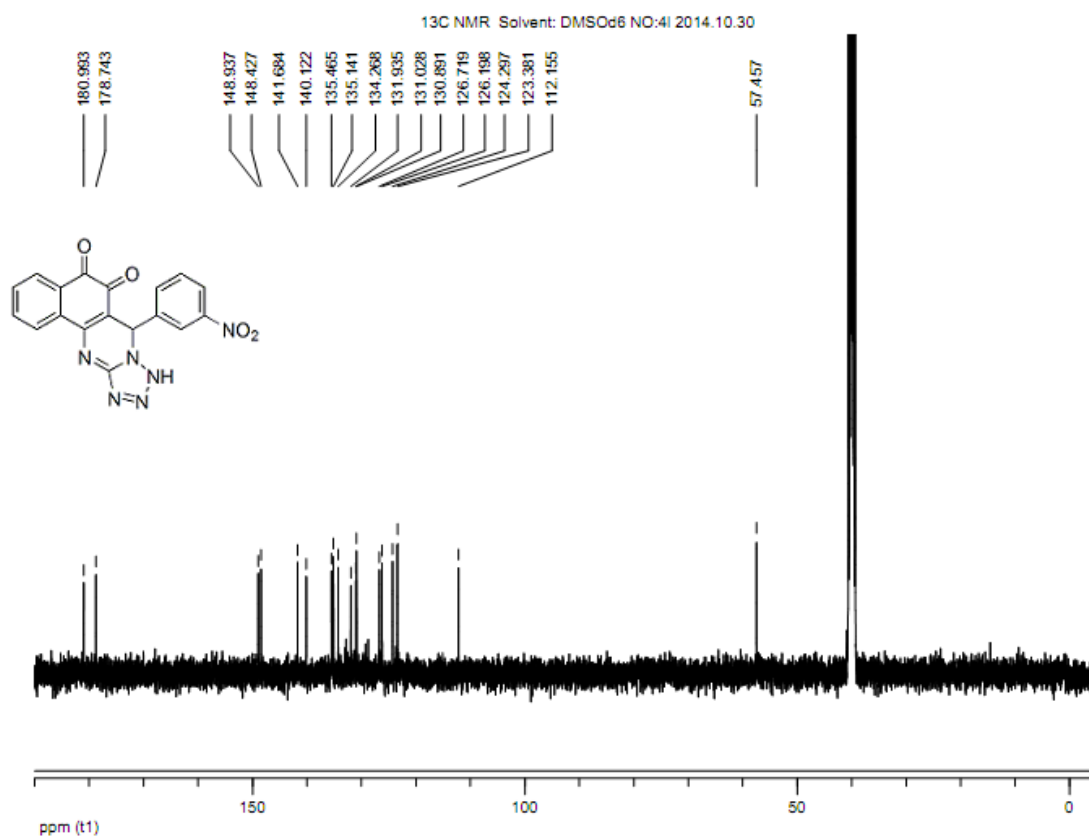

Figure 46 <sup>13</sup>C NMR of 41

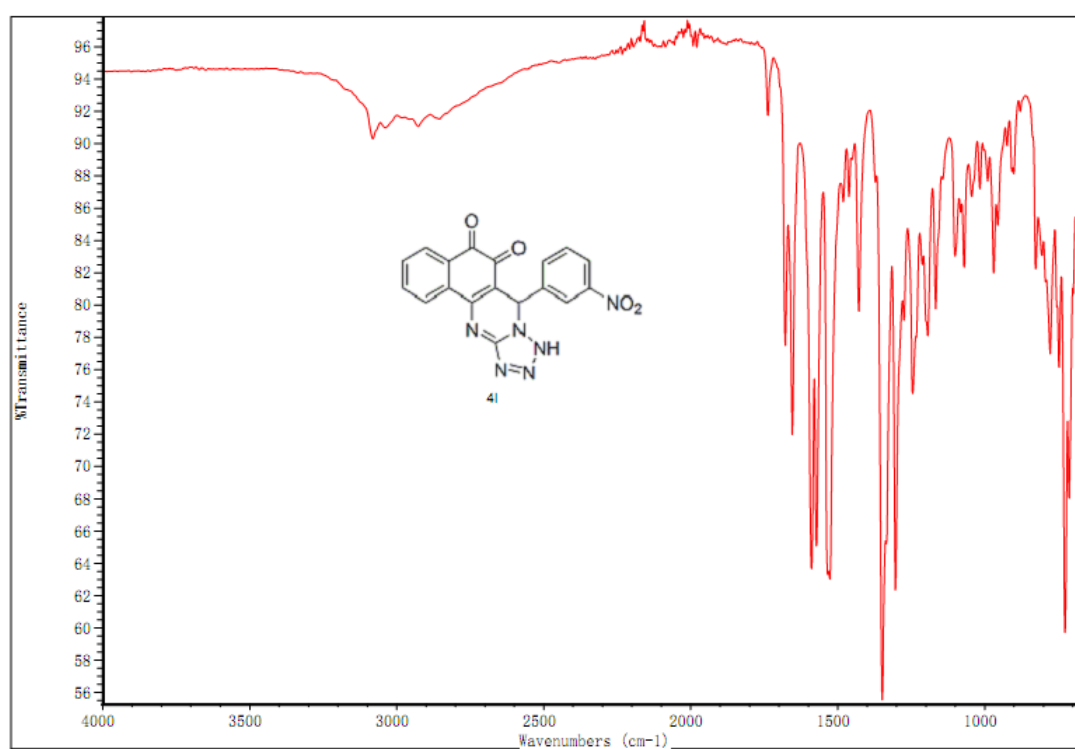

Figure 47 IR of 41

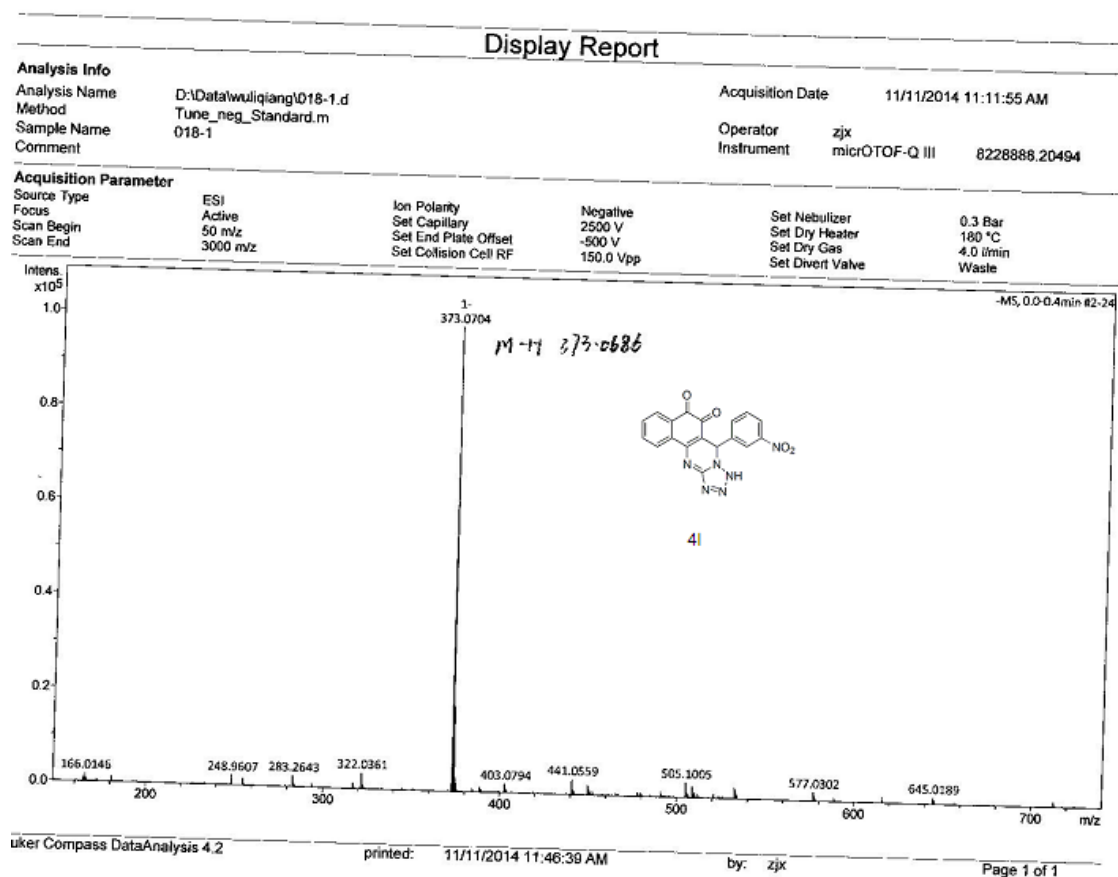

**Figure 48** HRMS of **4I**

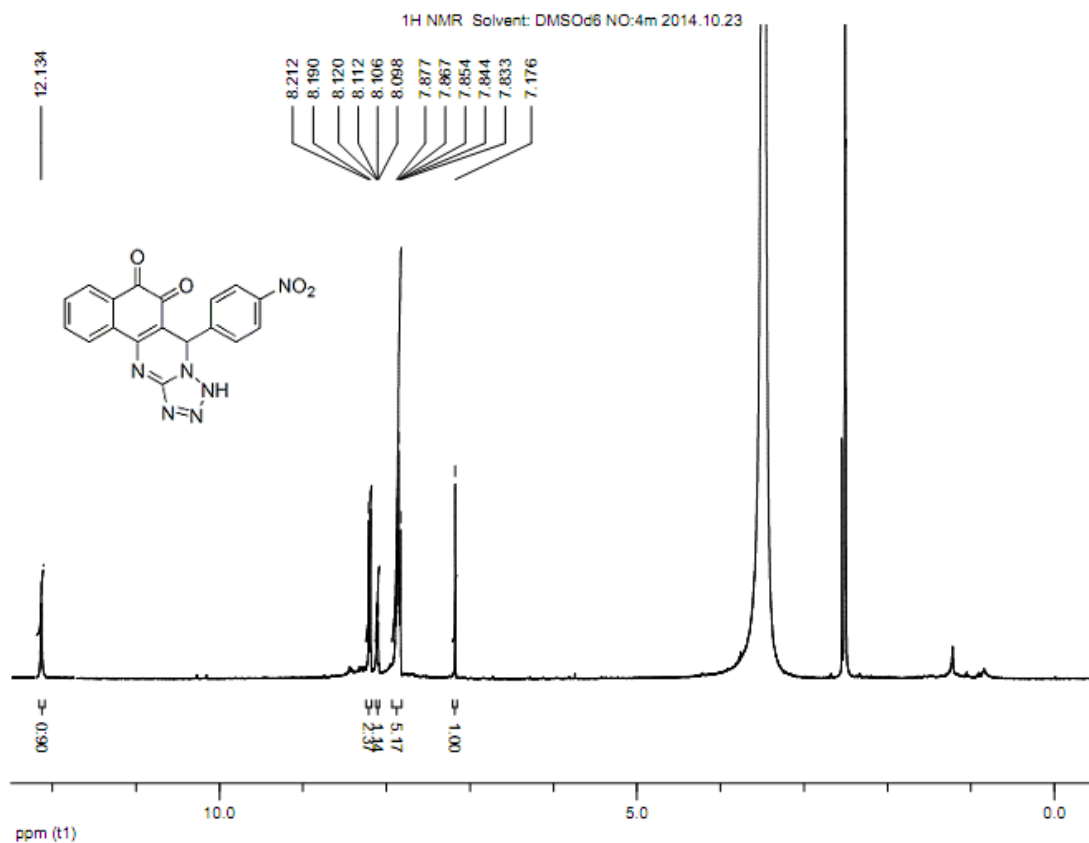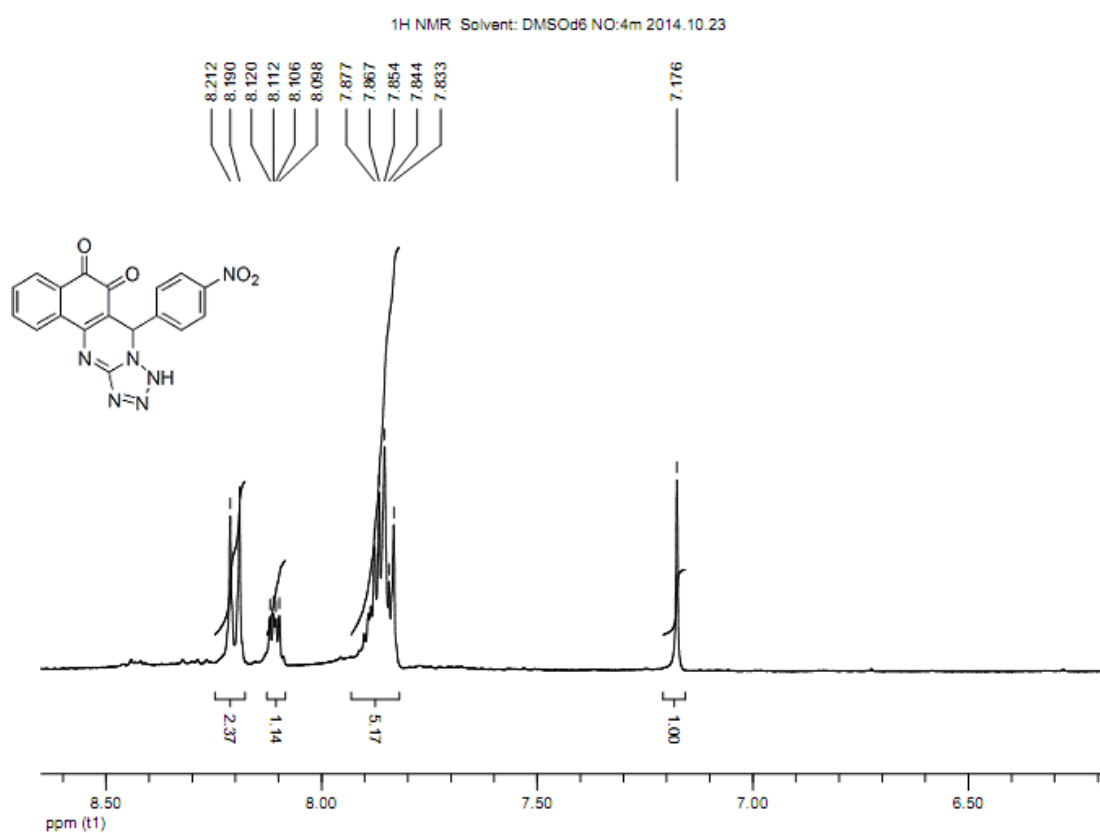

Figure 49  $^1\text{H}$  NMR of 4m

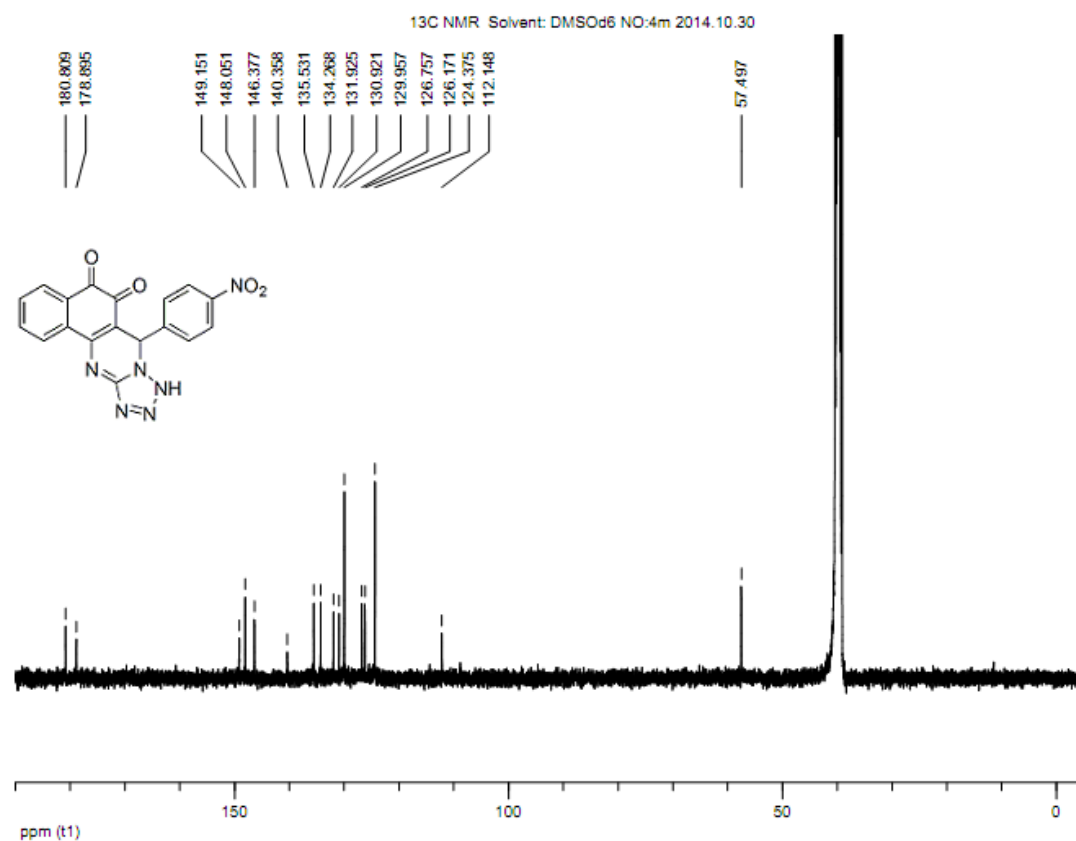

Figure 50 <sup>13</sup>C NMR of 4m

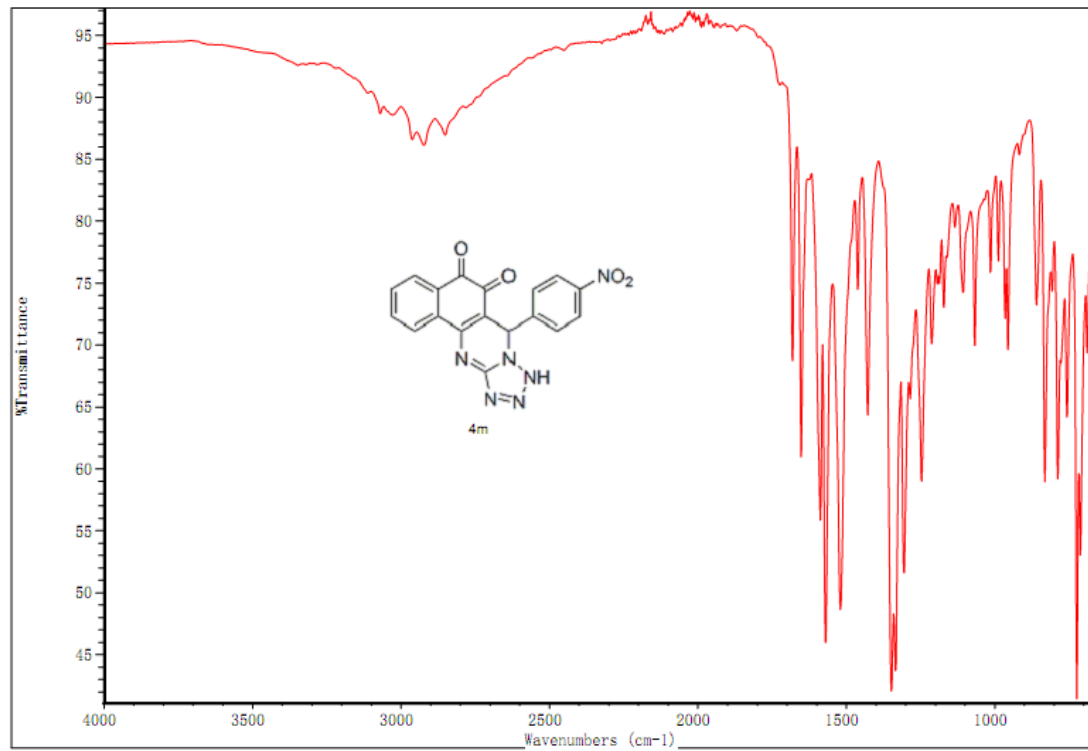

Figure 51 IR of 4m

## Display Report

**Analysis Info**  
 Analysis Name D:\Data\wuliqiang\20-neg.d  
 Method Tune\_neg\_Standard.m  
 Sample Name 20-neg  
 Comment

Acquisition Date 11/6/2014 11:12:32 AM  
 Operator zjx  
 Instrument micrOTOF-Q III 6228888.20494

### Acquisition Parameter

|             |          |                       |           |                  |           |
|-------------|----------|-----------------------|-----------|------------------|-----------|
| Source Type | ESI      | Ion Polarity          | Negative  | Set Nebulizer    | 0.3 Bar   |
| Focus       | Active   | Set Capillary         | 2500 V    | Set Dry Heater   | 180 °C    |
| Scan Begin  | 50 m/z   | Set End Plate Offset  | -500 V    | Set Dry Gas      | 4.0 l/min |
| Scan End    | 3000 m/z | Set Collision Cell RF | 150.0 Vpp | Set Divert Valve | Waste     |

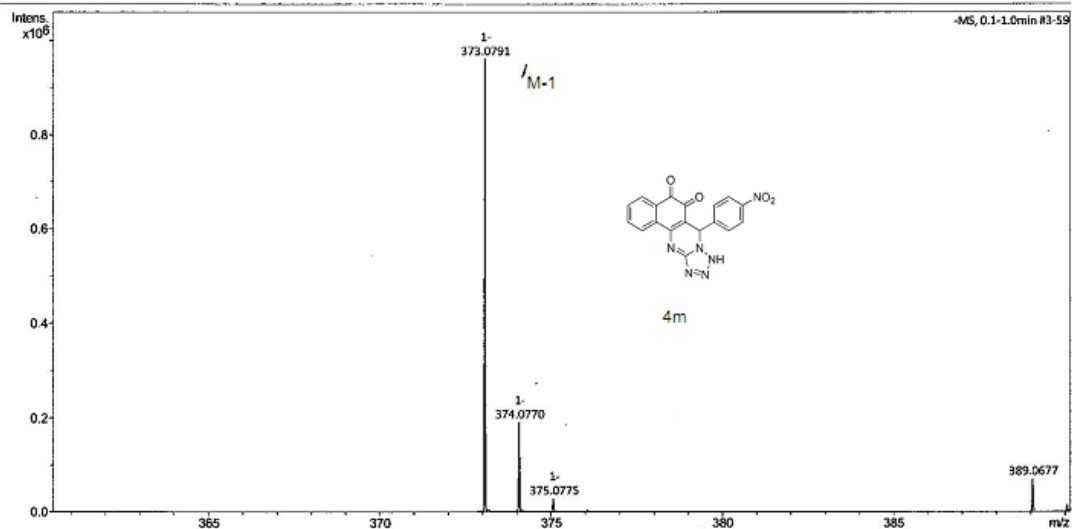

Bruker Compass DataAnalysis 4.2

printed: 11/6/2014 3:45:11 PM

by: zjx

Page 1 of 1

**Figure 52 HRMS of 4m**



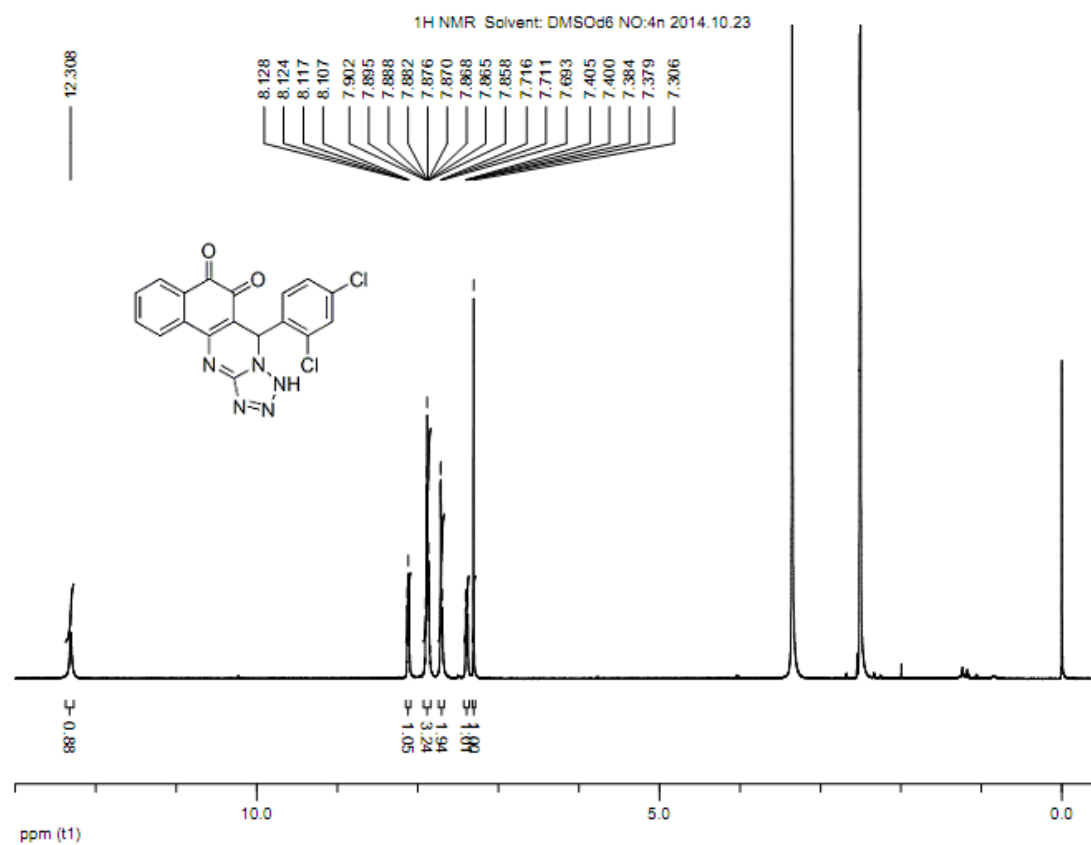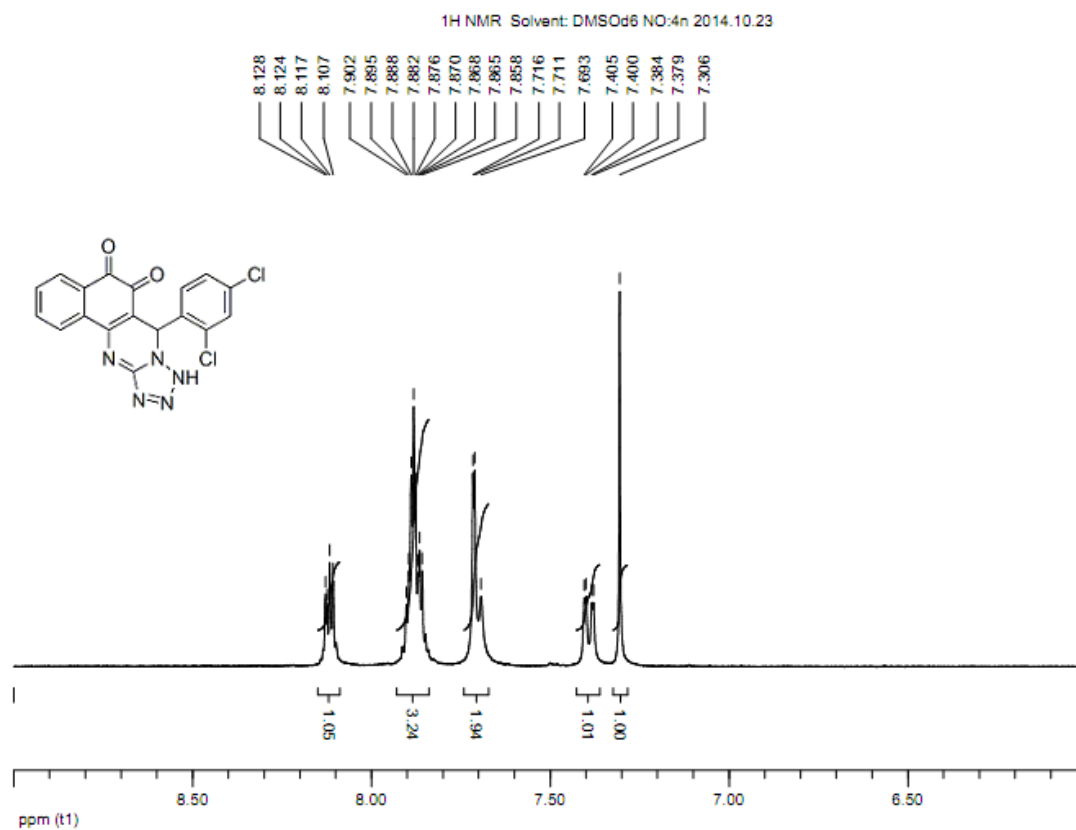

**Figure 53**  $^1\text{H}$  NMR of 4n

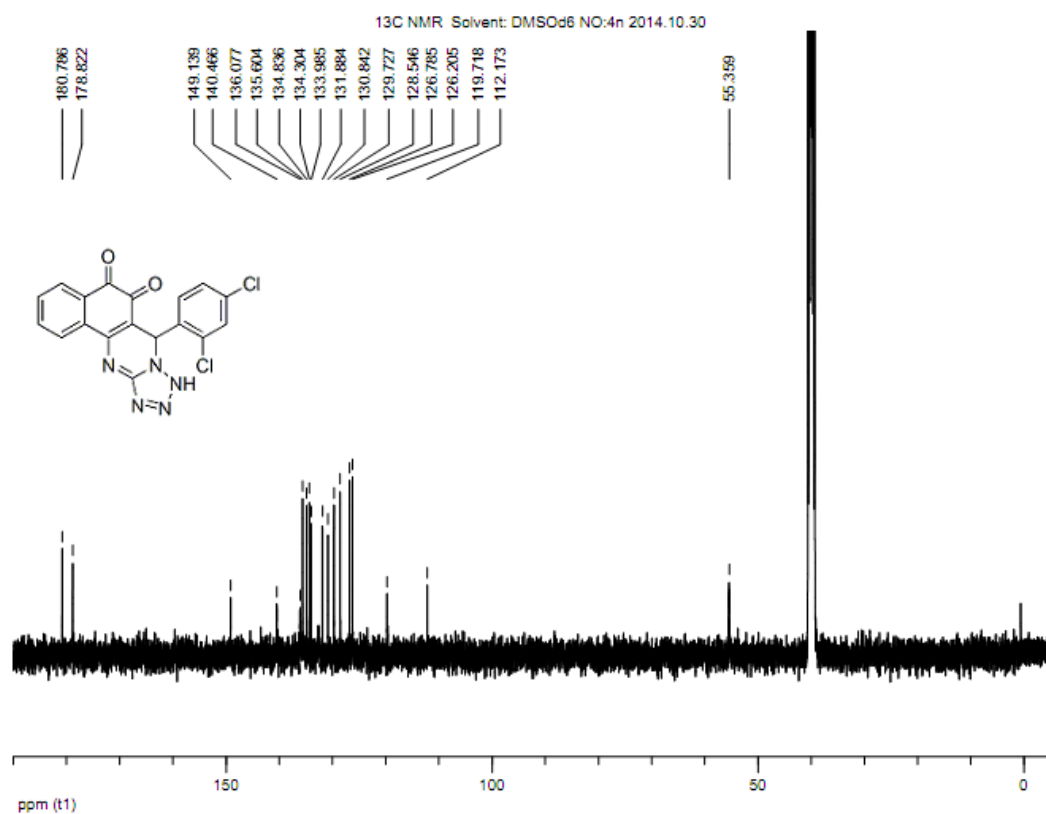

Figure 54  $^{13}\text{C}$  NMR of 4n

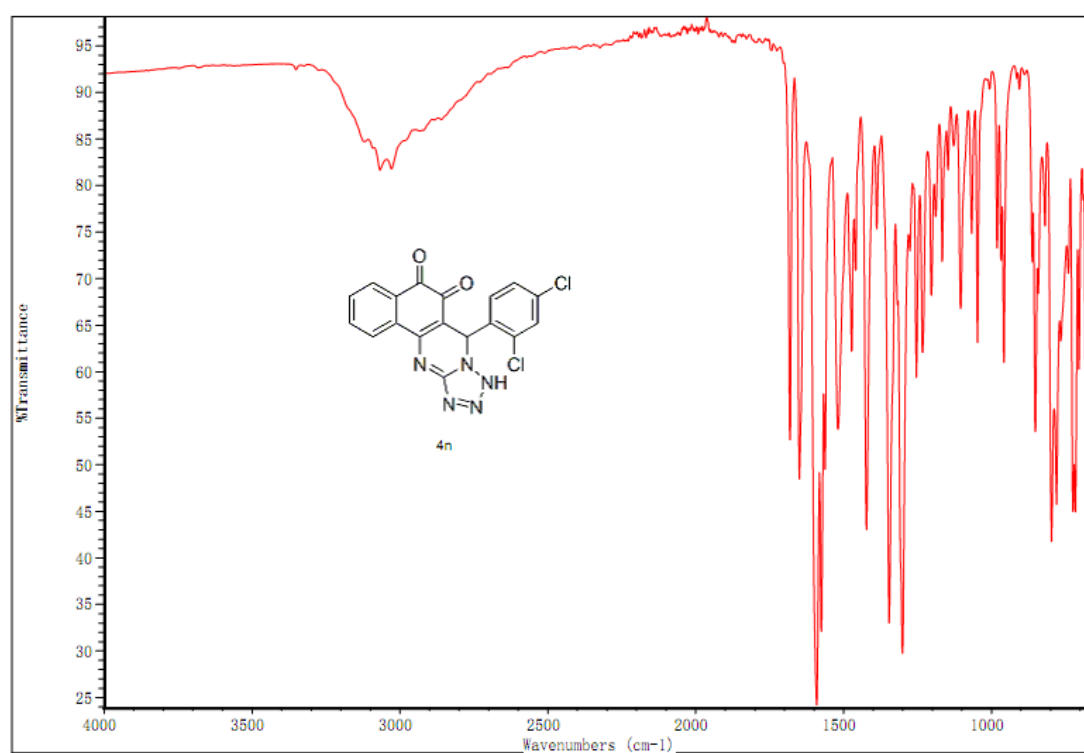

Figure 55 IR of 4n

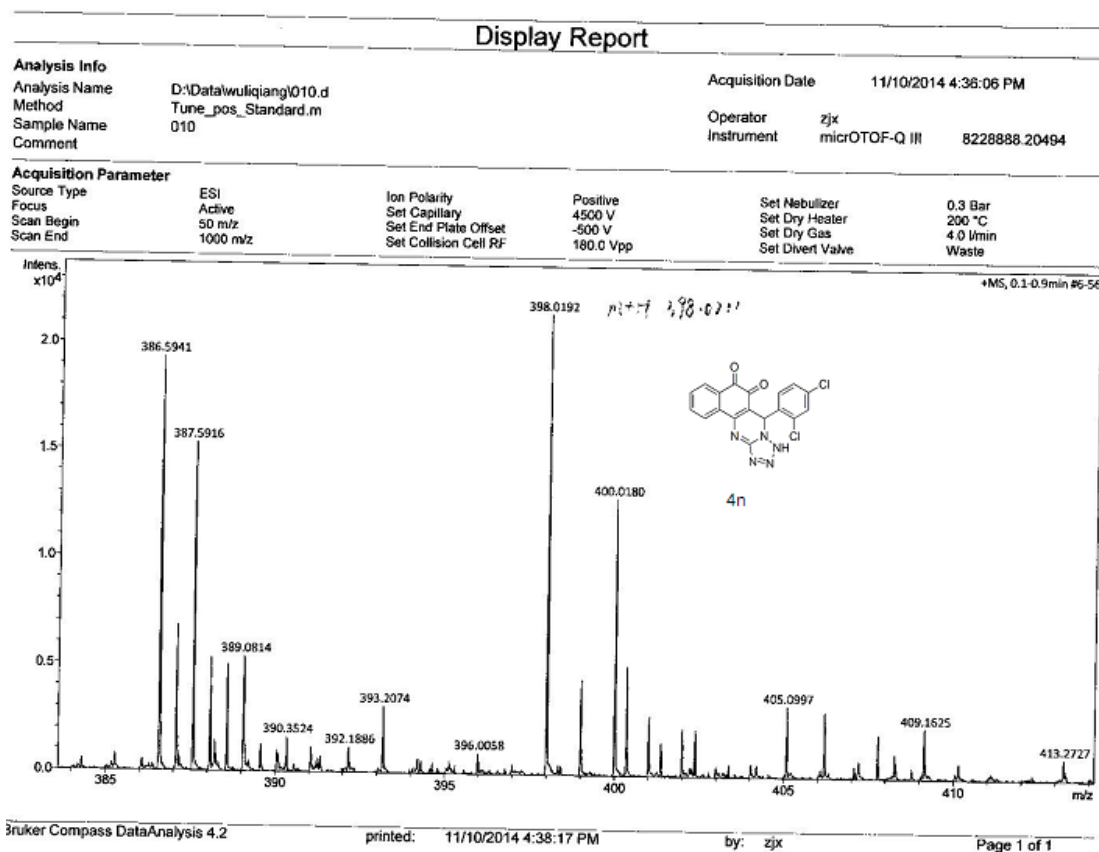

**Figure 56** HRMS of **4n**

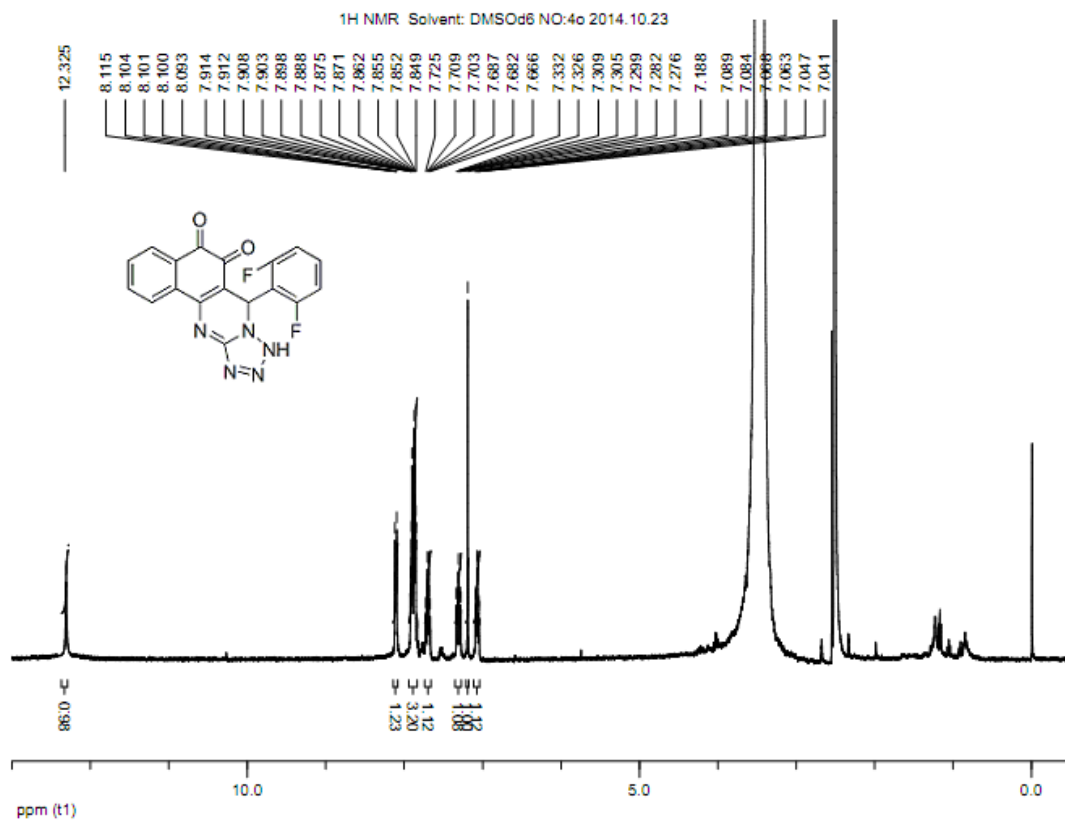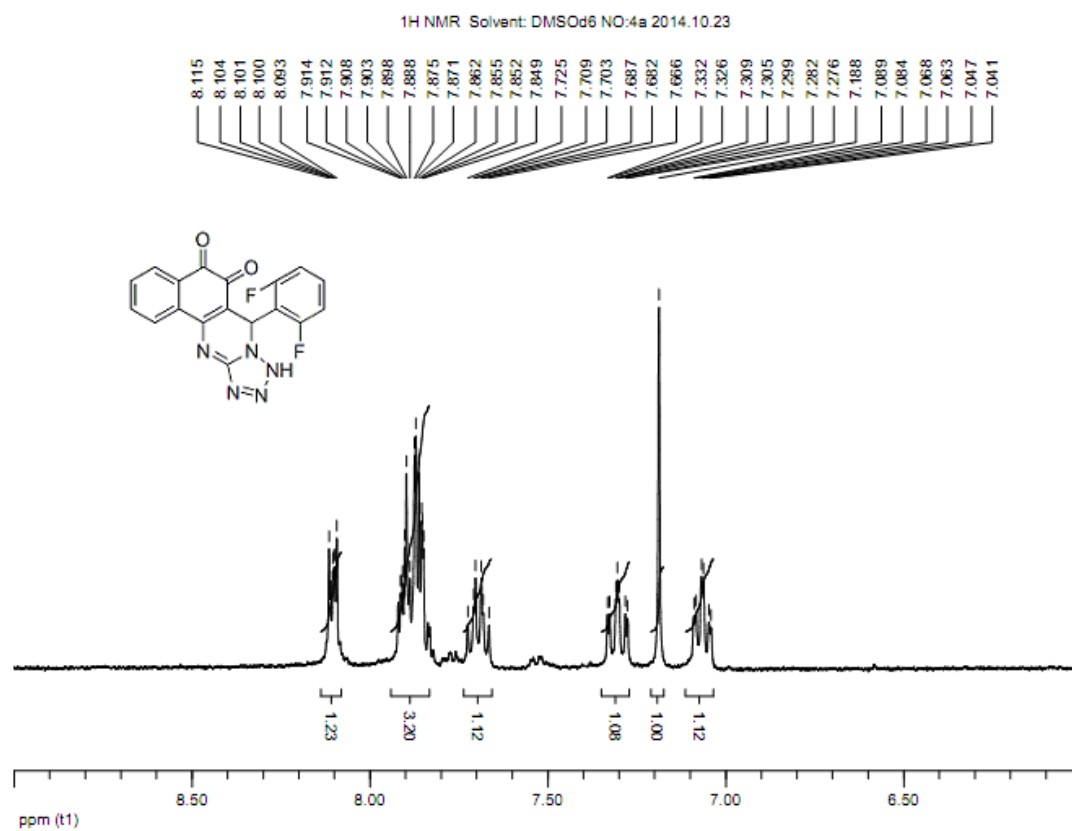

Figure S7 <sup>1</sup>H NMR of 4o

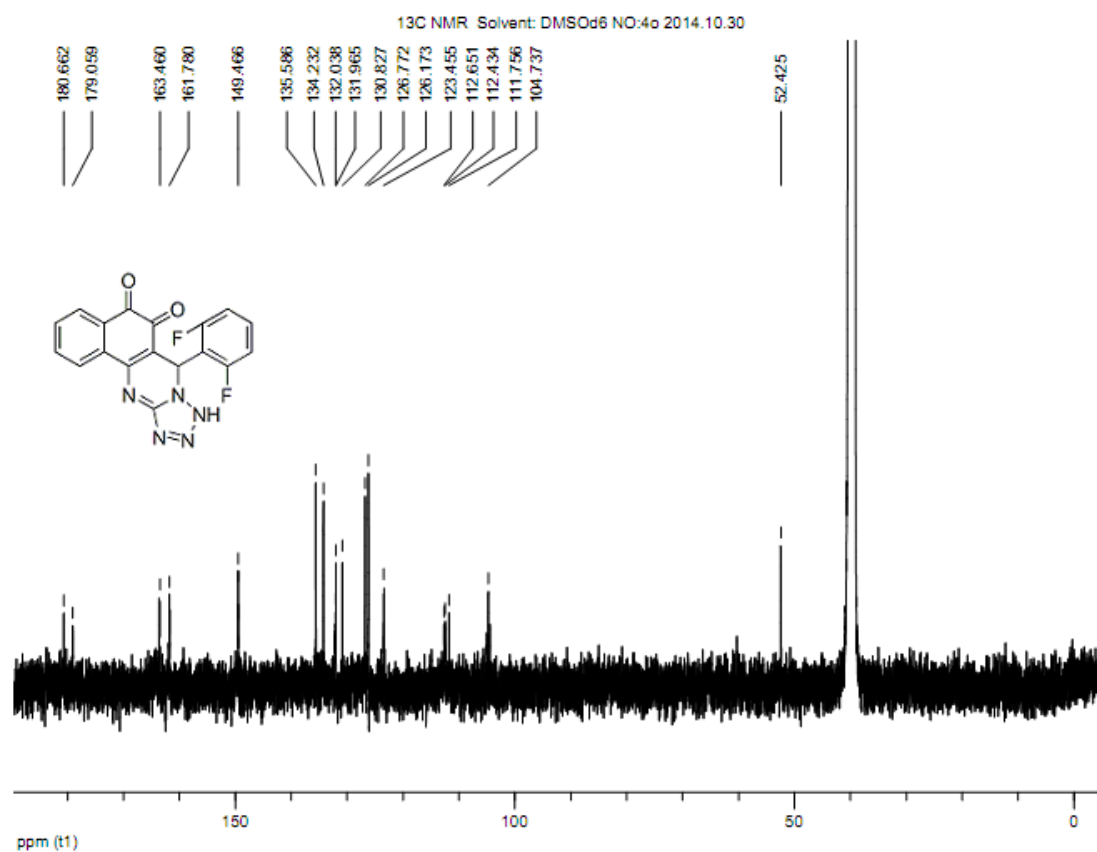

Figure 58 <sup>13</sup>C NMR of 4o

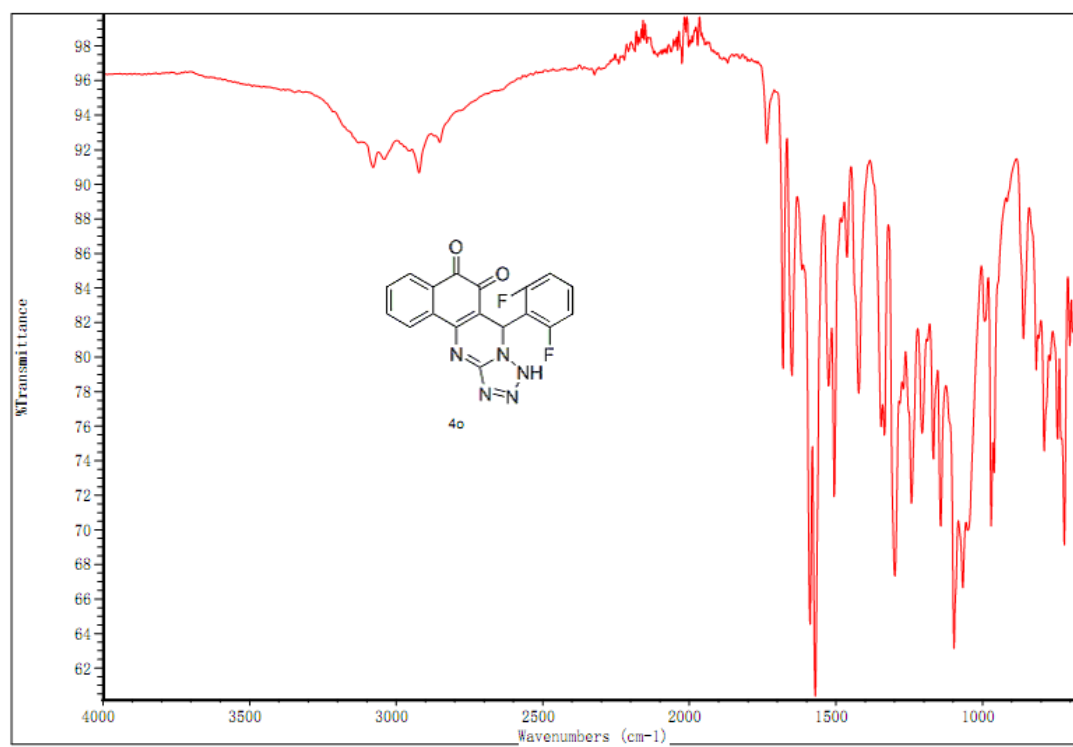

Figure 59 IR of 4o

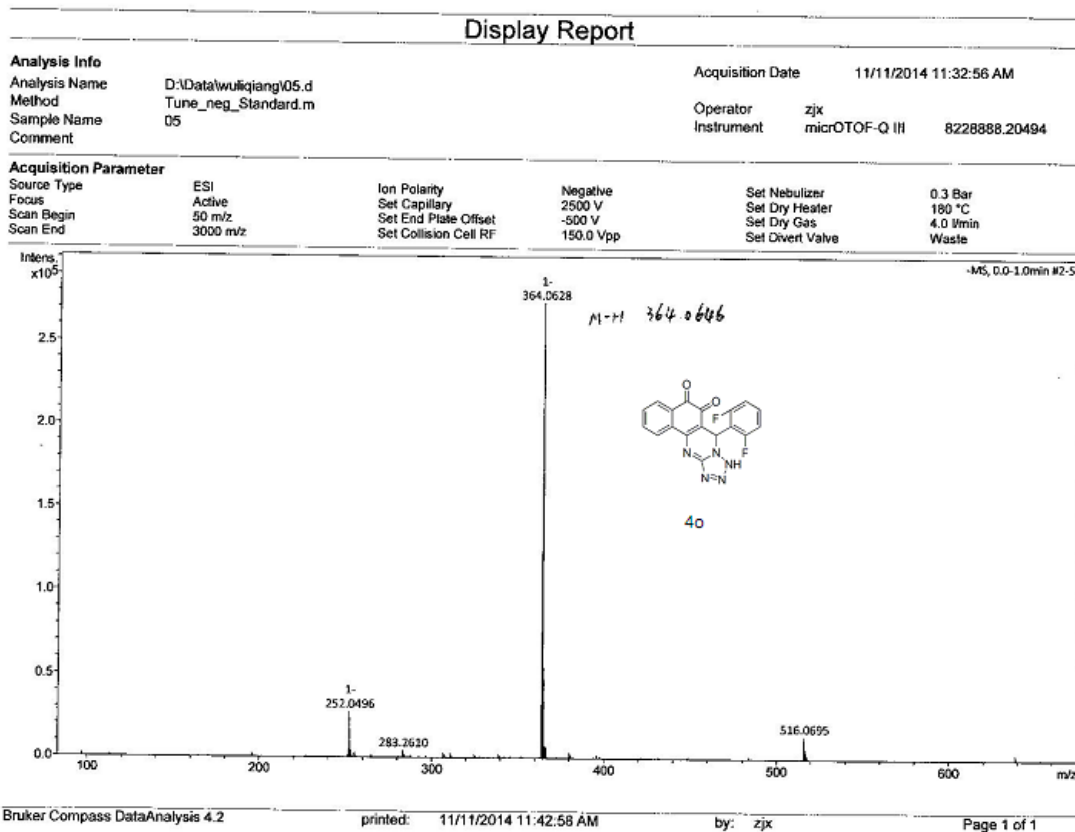

**Figure 60** HRMS of **4o**

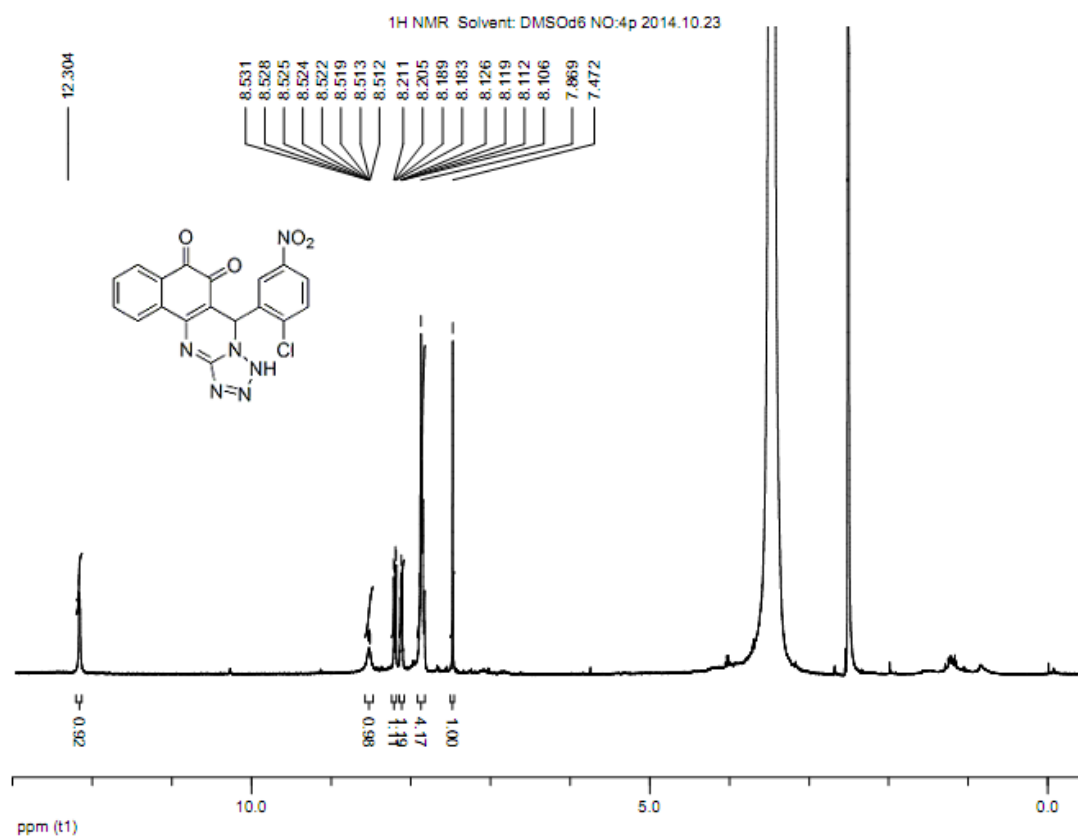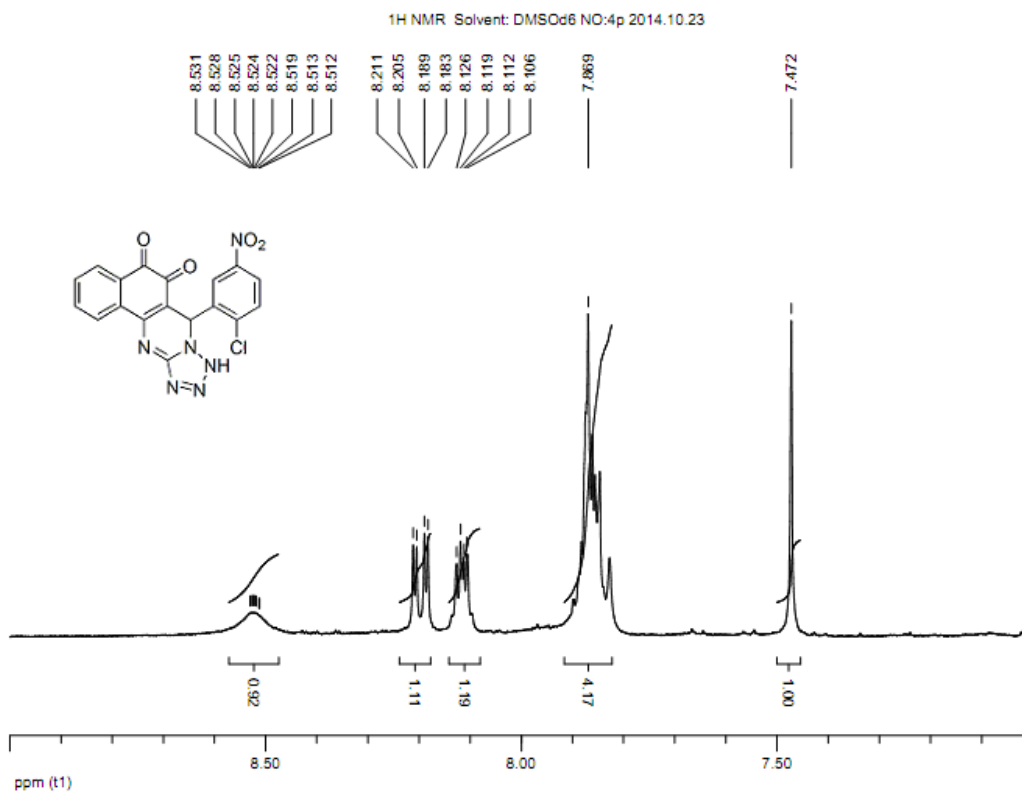

Figure 61 <sup>1</sup>H NMR of 4p

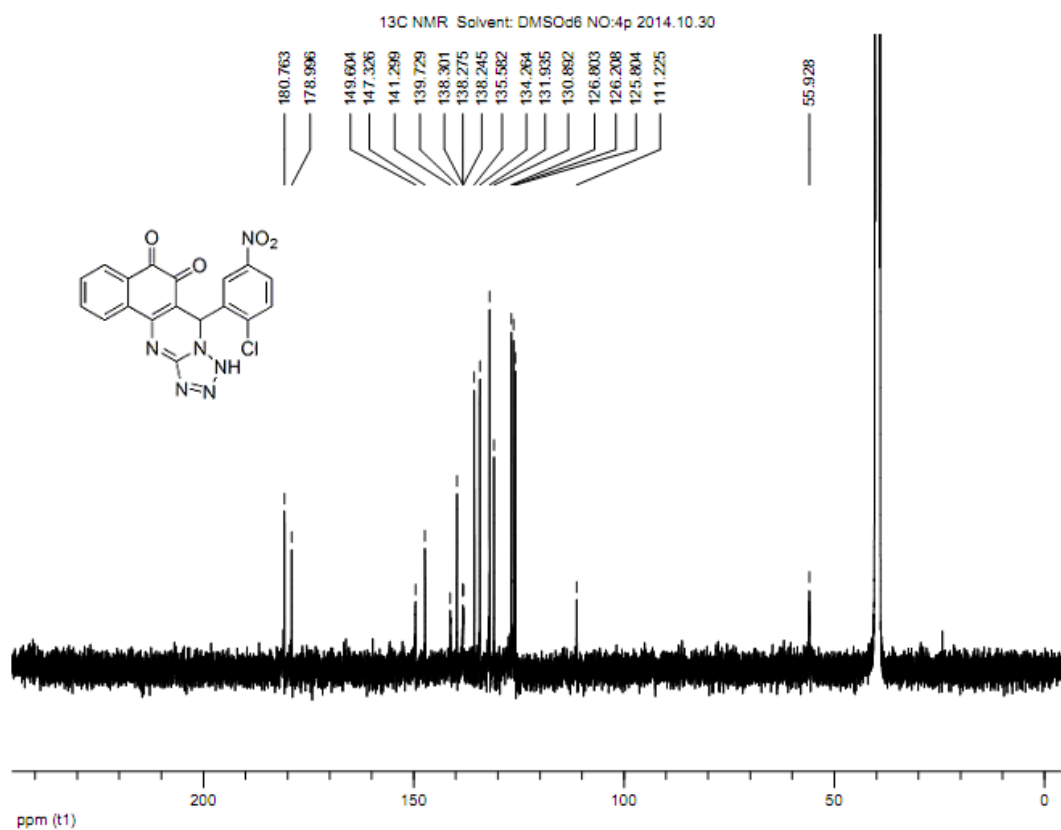

Figure 62 <sup>13</sup>C NMR of 4p

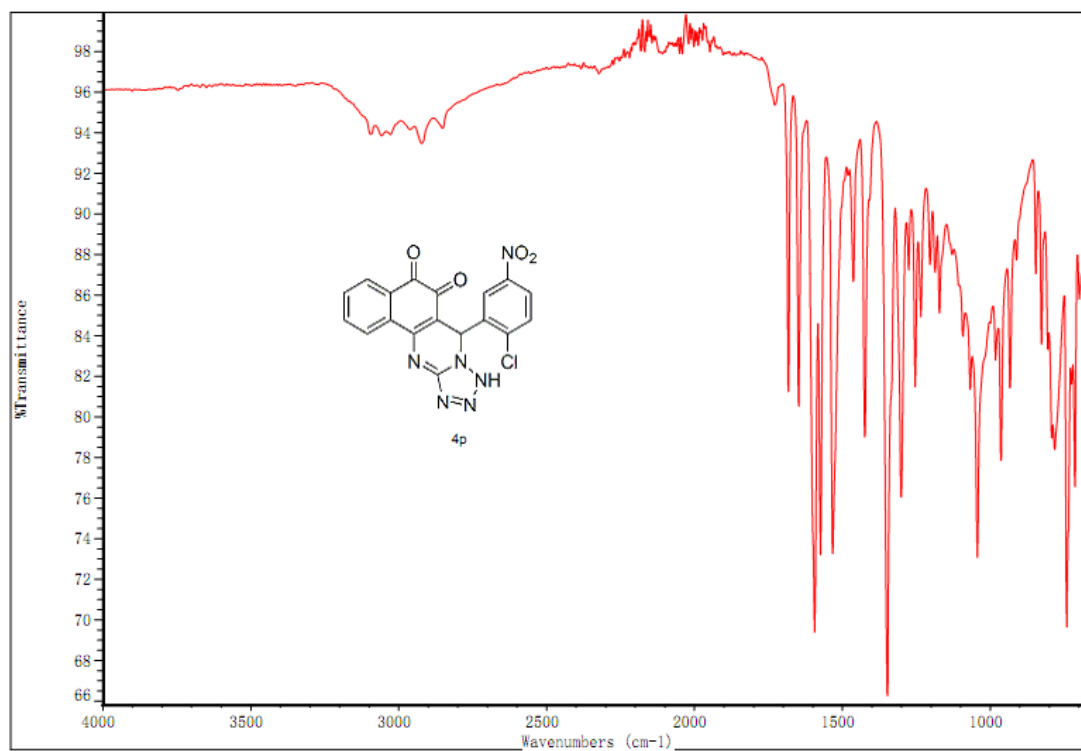

Figure 63 IR of 4p



## Display Report

|                      |                            |                  |                              |
|----------------------|----------------------------|------------------|------------------------------|
| <b>Analysis Info</b> |                            | Acquisition Date | 11/6/2014 9:31:18 AM         |
| Analysis Name        | D:\Data\wuliqiang\6-meoh.d | Operator         | zjx                          |
| Method               | Tune_pos_Standard.m        | Instrument       | microTOF-Q III 8228888.20494 |
| Sample Name          | 6-meoh                     |                  |                              |
| Comment              |                            |                  |                              |

|                              |          |                       |           |
|------------------------------|----------|-----------------------|-----------|
| <b>Acquisition Parameter</b> |          |                       |           |
| Source Type                  | ESI      | Ion Polarity          | Positive  |
| Focus                        | Active   | Set Capillary         | 4500 V    |
| Scan Begin                   | 50 m/z   | Set End Plate Offset  | -500 V    |
| Scan End                     | 1000 m/z | Set Collision Cell RF | 180.0 Vpp |
|                              |          | Set Nebulizer         | 0.3 Bar   |
|                              |          | Set Dry Heater        | 200 °C    |
|                              |          | Set Dry Gas           | 4.0 l/min |
|                              |          | Set Divert Valve      | Waste     |

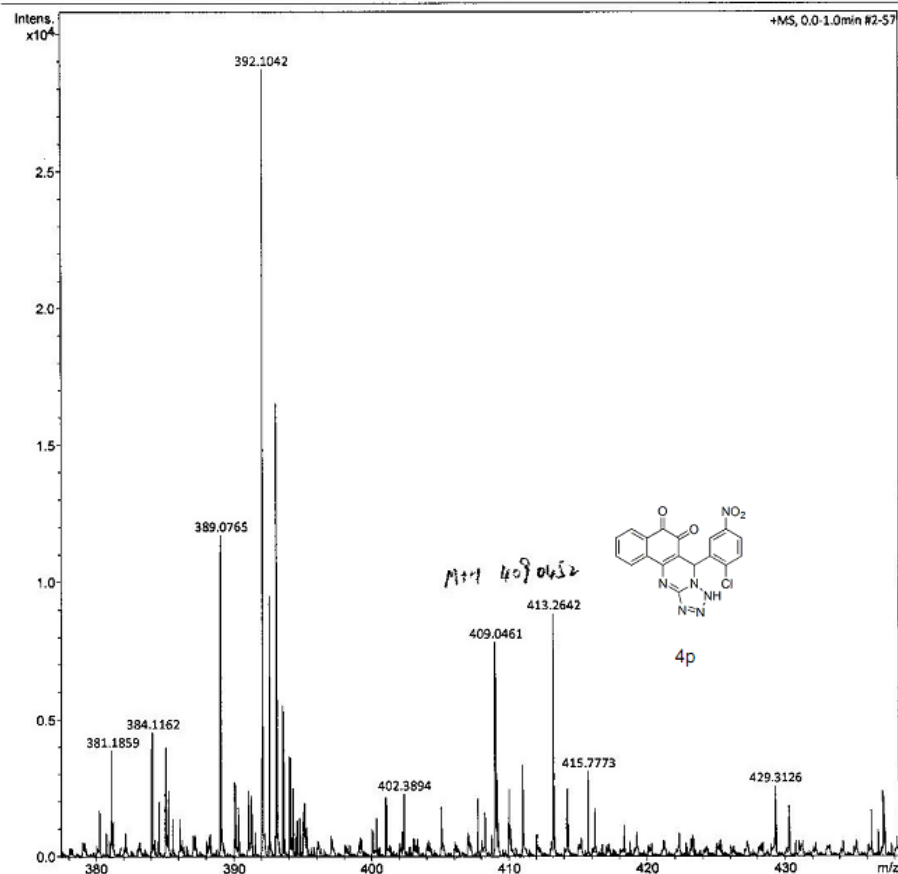

Bruker Compass DataAnalysis 4.2     
 printed: 11/6/2014 3:32:47 PM     
 by: zjx     
 Page 1 of 1

**Figure 64** HRMS of **4p**

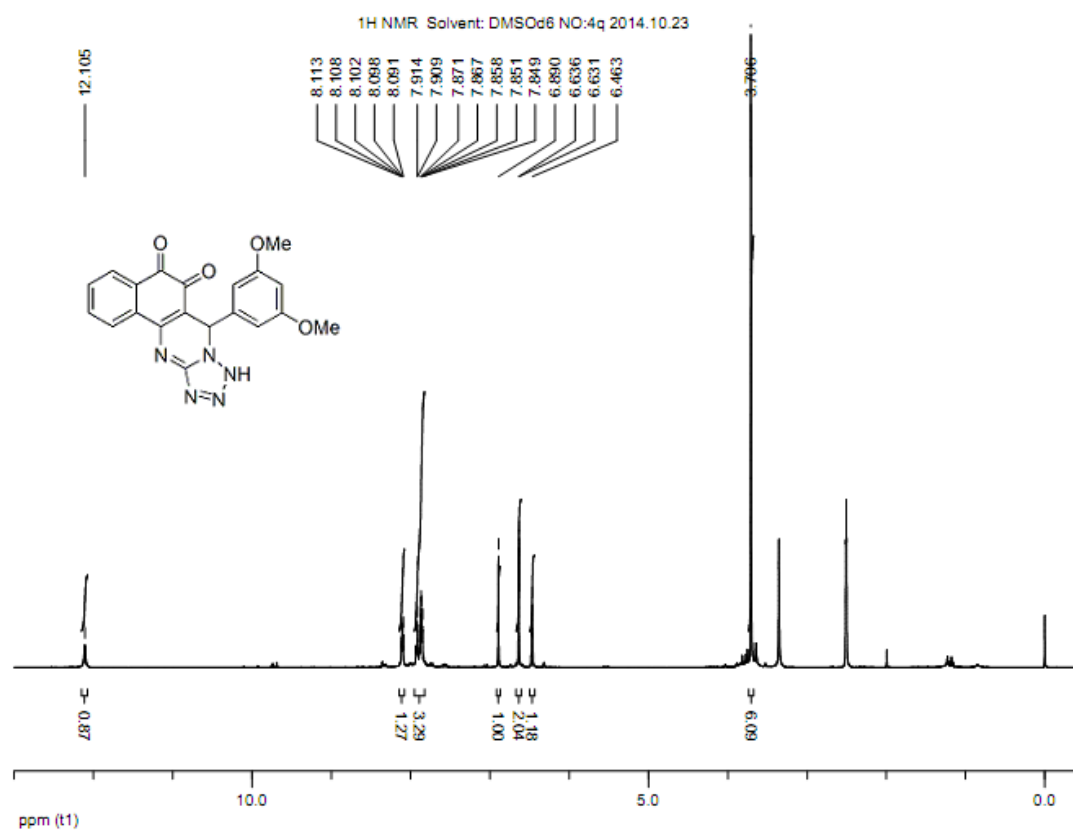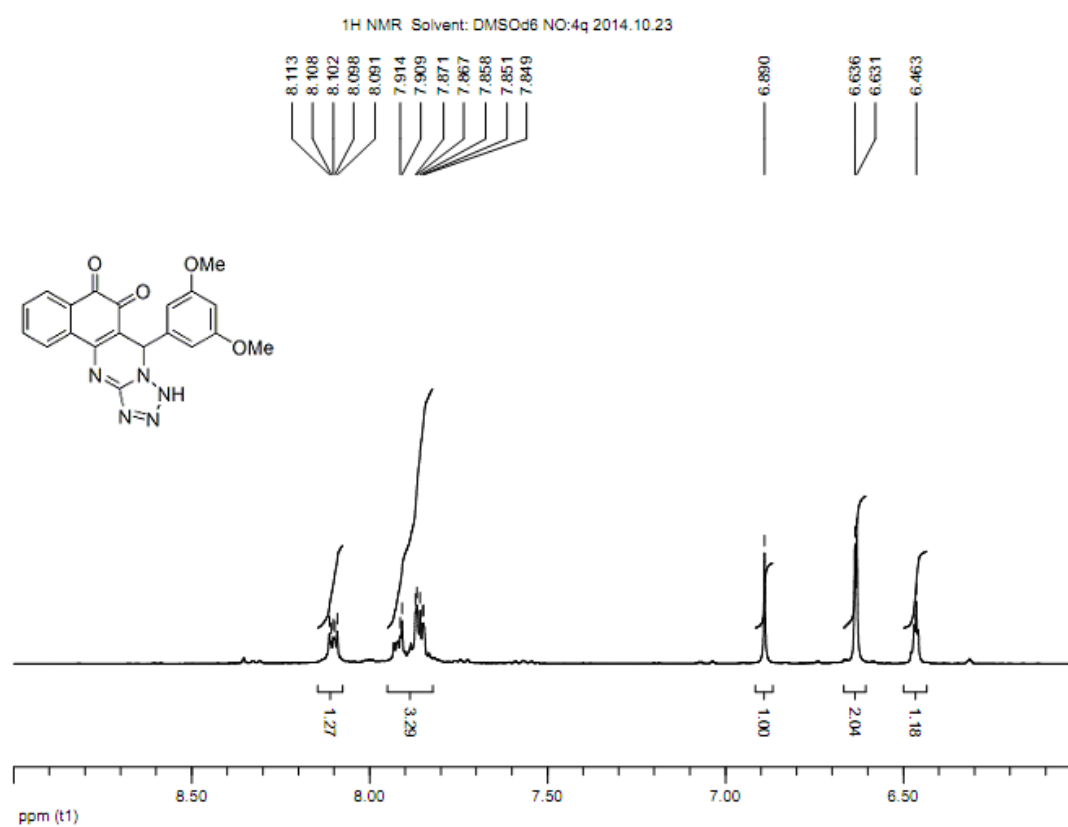

Figure 65  $^1\text{H}$  NMR of 4q

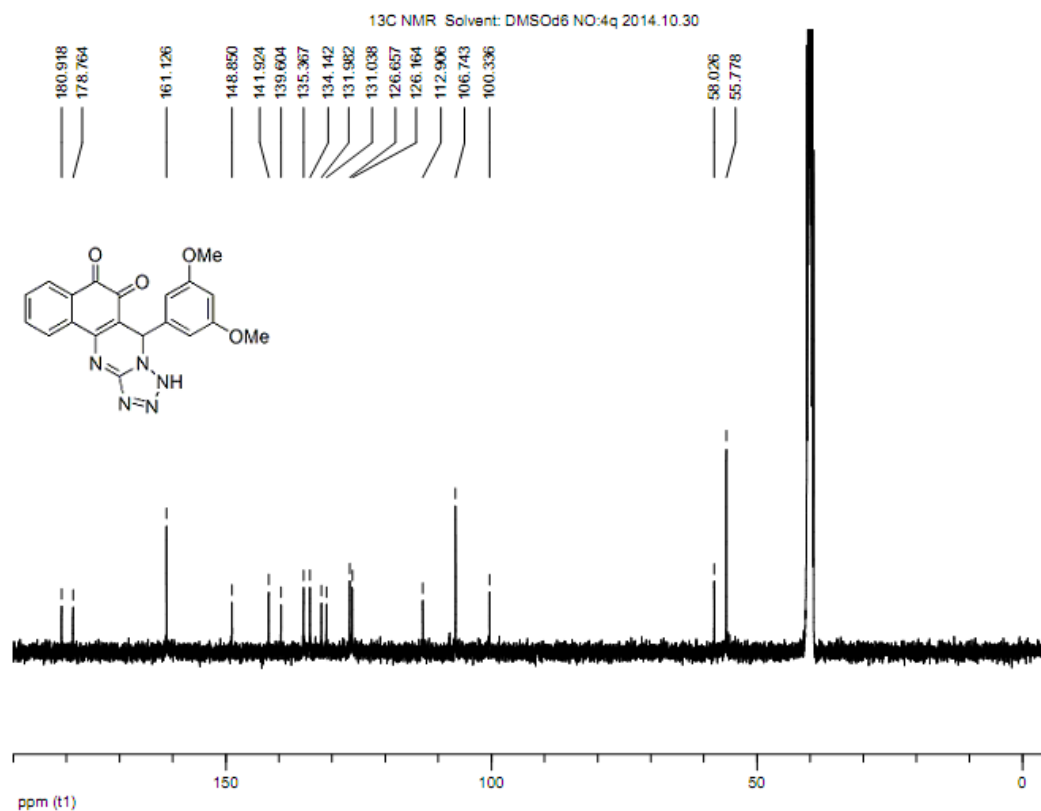

Figure 66 <sup>13</sup>C NMR of 4q

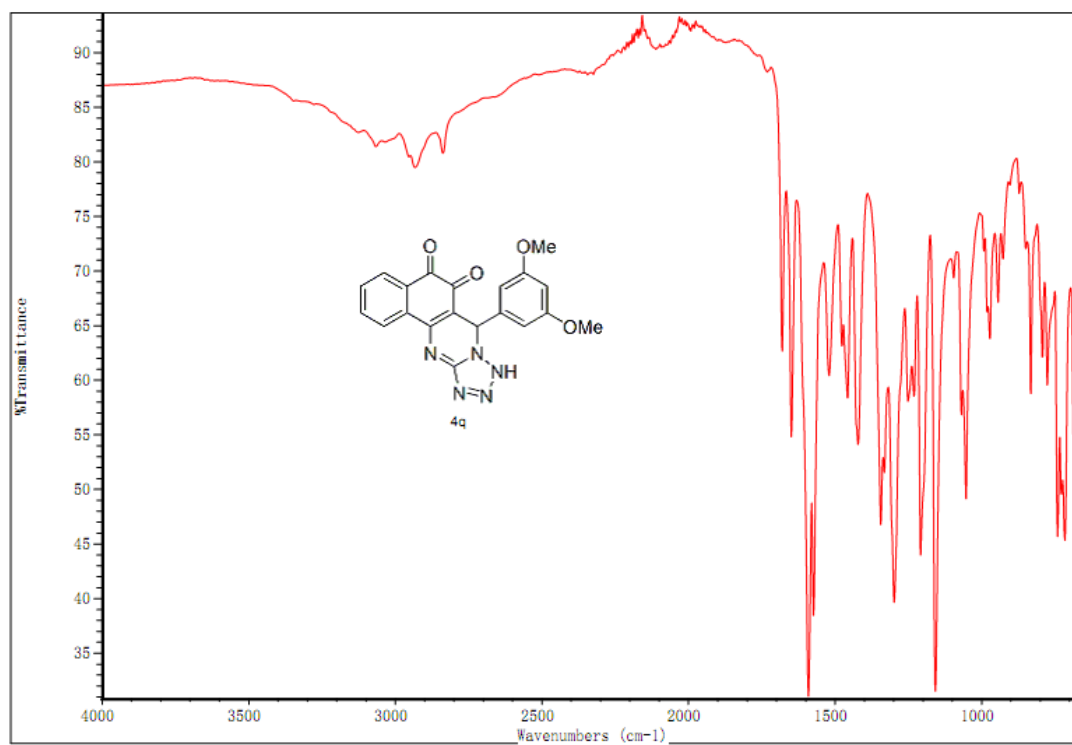

Figure 67 IR of 4q

# Display Report

|                      |                           |                                               |                |
|----------------------|---------------------------|-----------------------------------------------|----------------|
| <b>Analysis Info</b> |                           | <b>Acquisition Date</b> 11/10/2014 5:08:59 PM |                |
| Analysis Name        | D:\Data\wuliqiang\014-2.d | Operator                                      | zjx            |
| Method               | Tune_pos_Standard.m       | Instrument                                    | micrOTOF-Q III |
| Sample Name          | 014-2                     |                                               | 8228888.20494  |
| Comment              |                           |                                               |                |

## Acquisition Parameter

|             |          |                       |           |                  |           |
|-------------|----------|-----------------------|-----------|------------------|-----------|
| Source Type | ESI      | Ion Polarity          | Positive  | Set Nebulizer    | 0.3 Bar   |
| Focus       | Active   | Set Capillary         | 4500 V    | Set Dry Heater   | 200 °C    |
| Scan Begin  | 50 m/z   | Set End Plate Offset  | -500 V    | Set Dry Gas      | 4.0 l/min |
| Scan End    | 1000 m/z | Set Collision Cell RF | 180.0 Vpp | Set Divert Valve | Waste     |

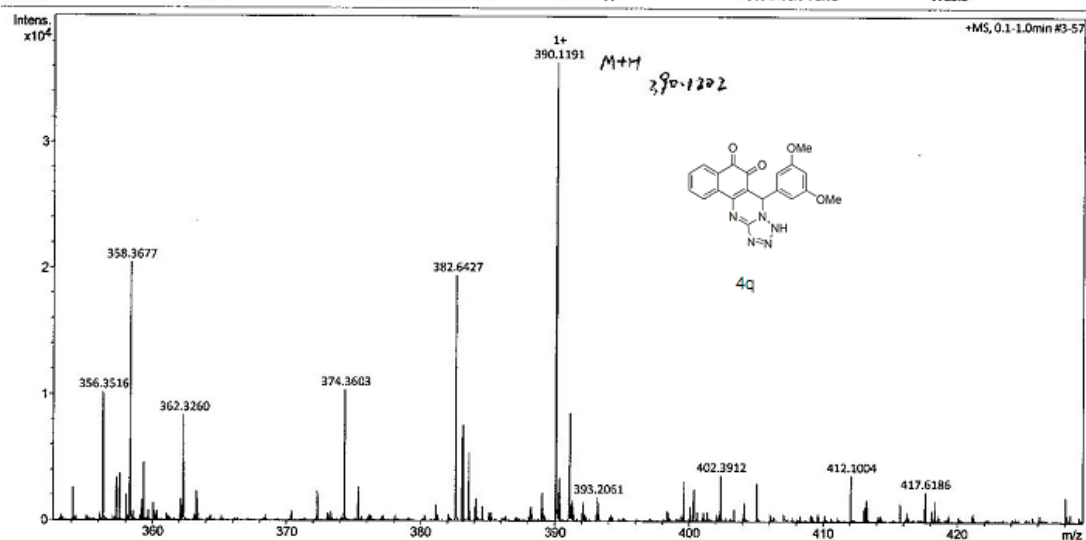

Bruker Compass DataAnalysis 4.2

printed: 11/10/2014 5:10:42 PM

by: zjx

Page 1 of 1

**Figure 68** HRMS of **4q**

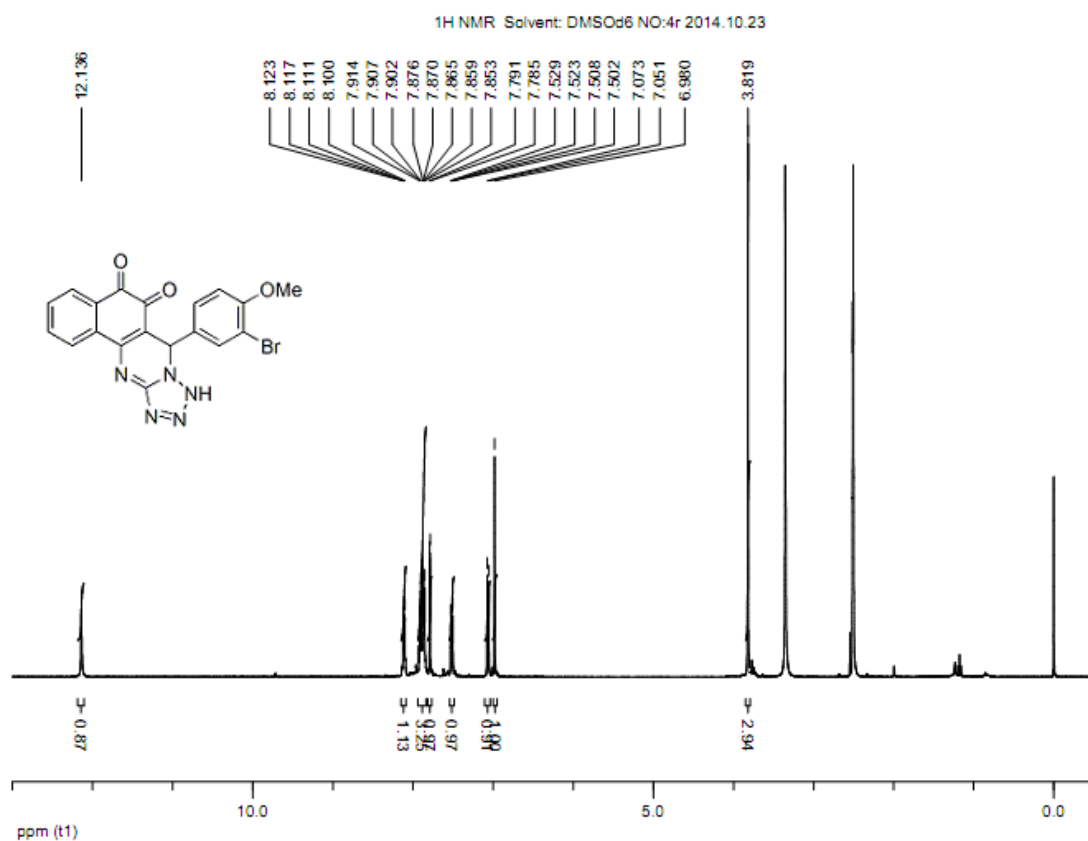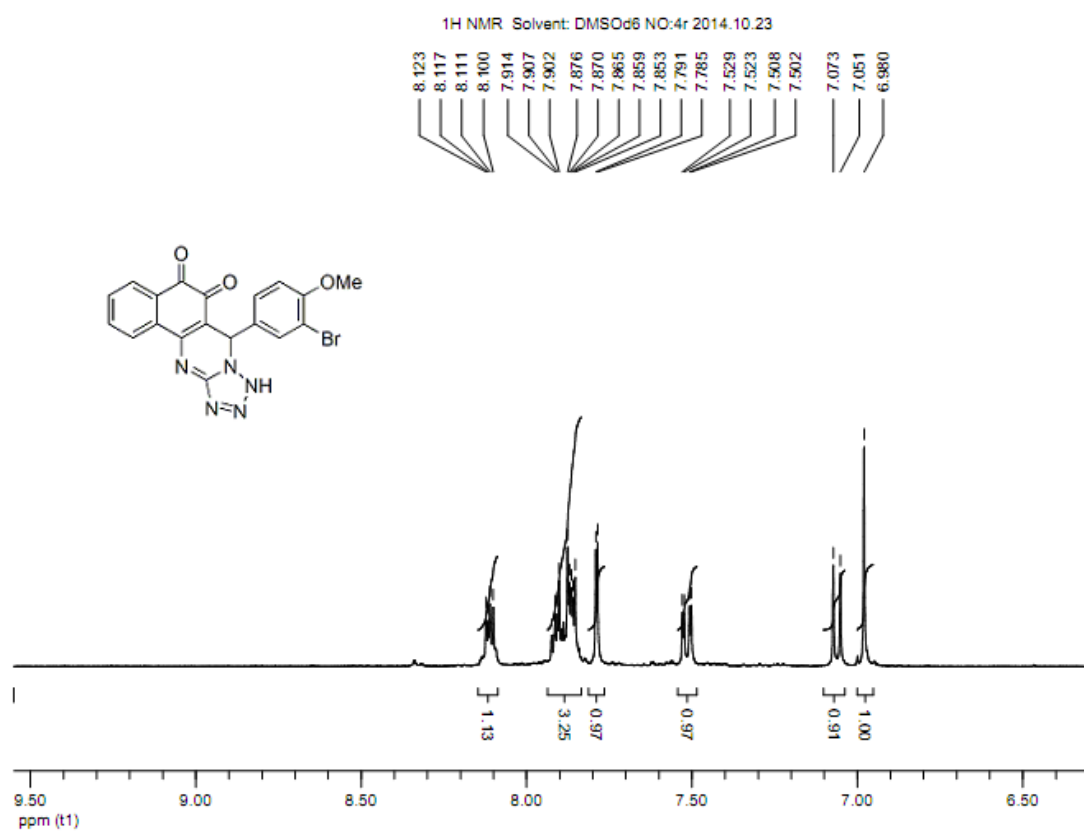

Figure 69  $^1\text{H}$  NMR of 4r

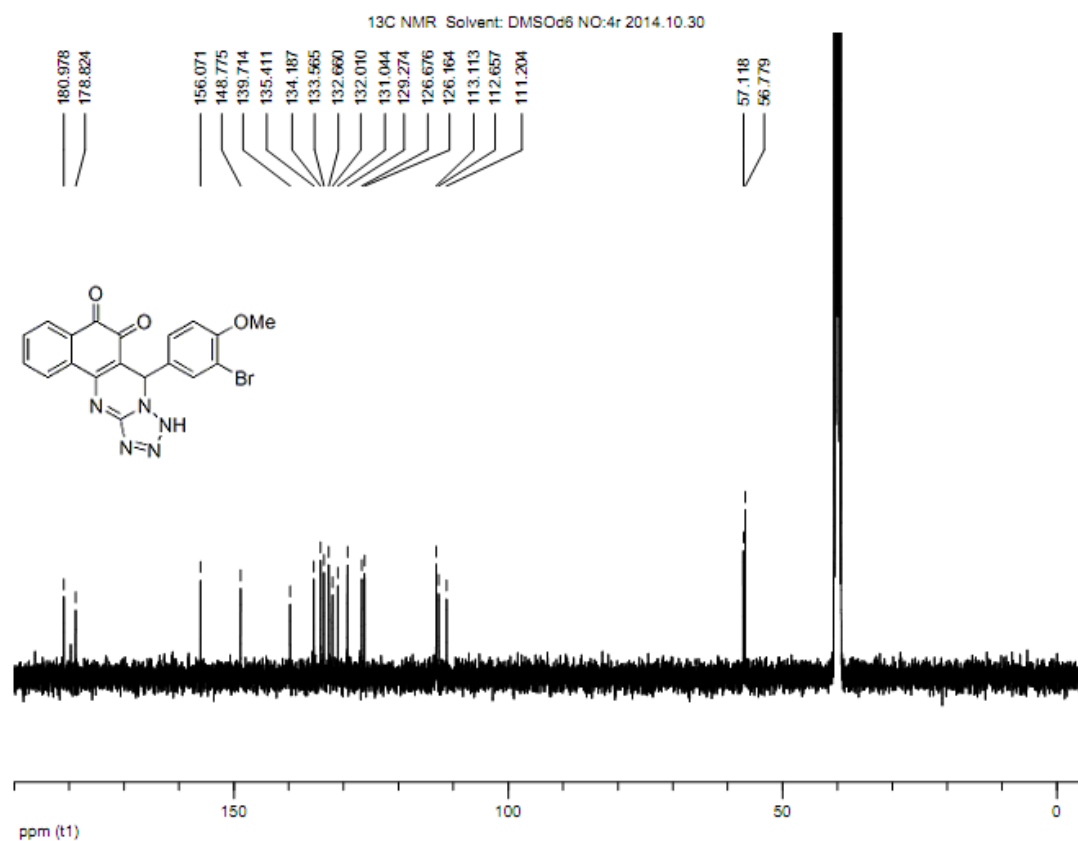

Figure 70 <sup>13</sup>C NMR of 4r

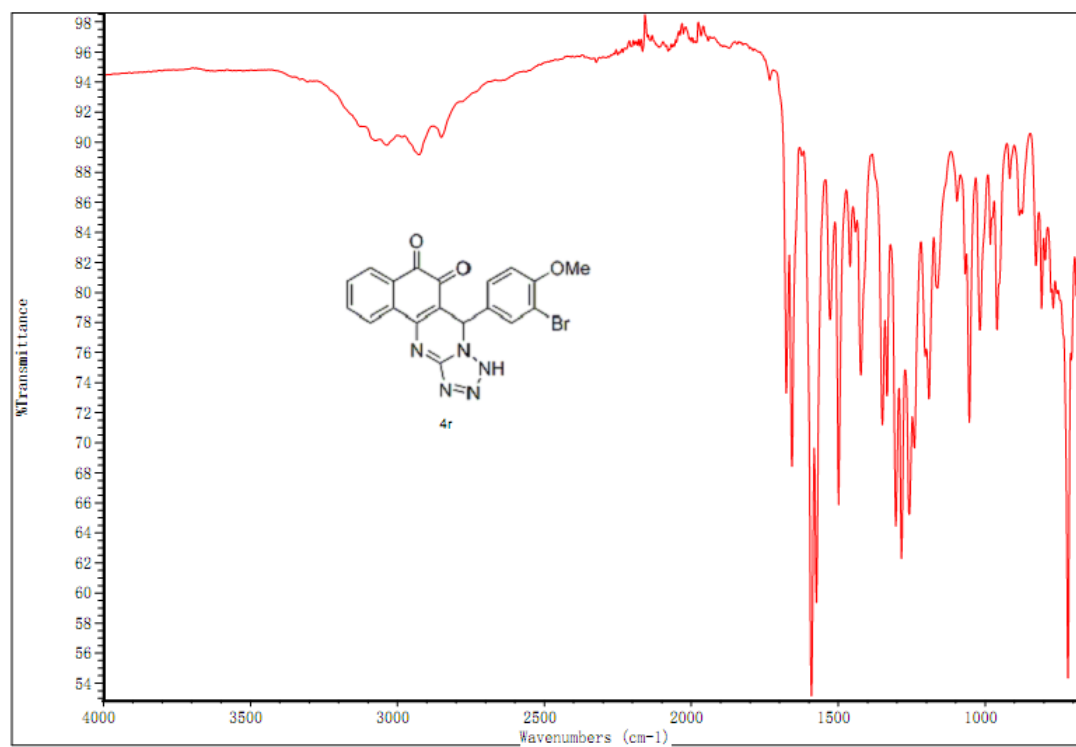

Figure 71 IR of 4r

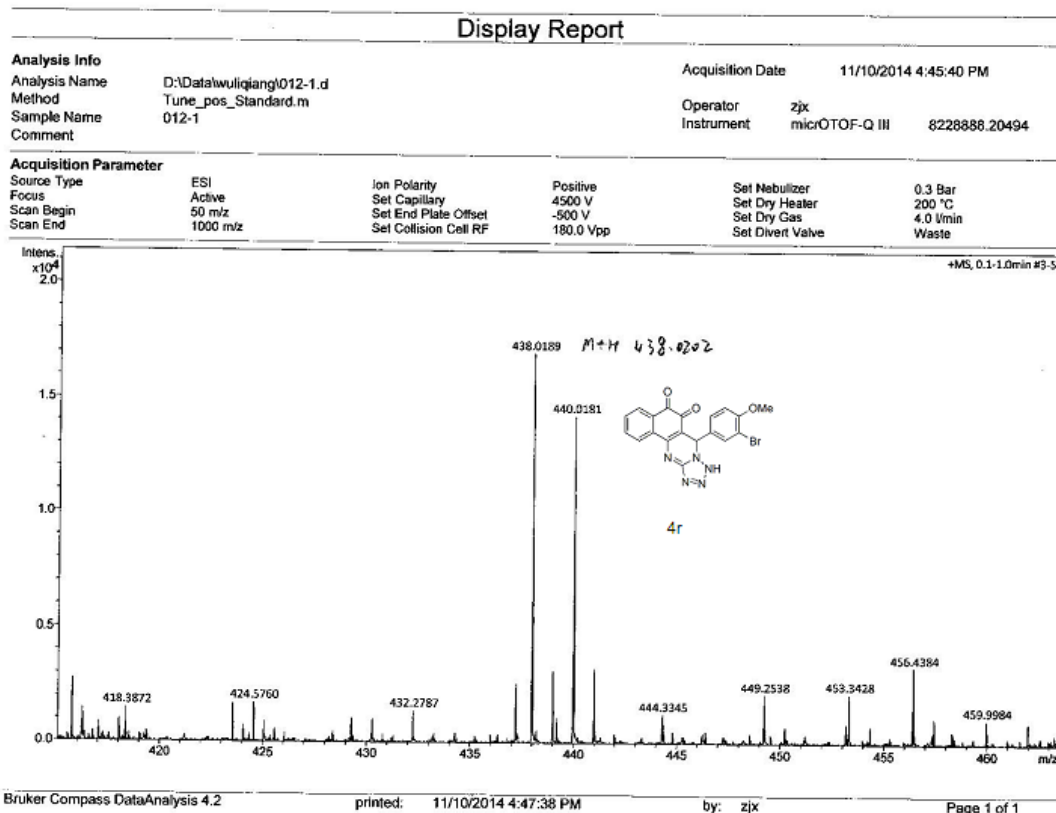

**Figure 72** HRMS of **4r**

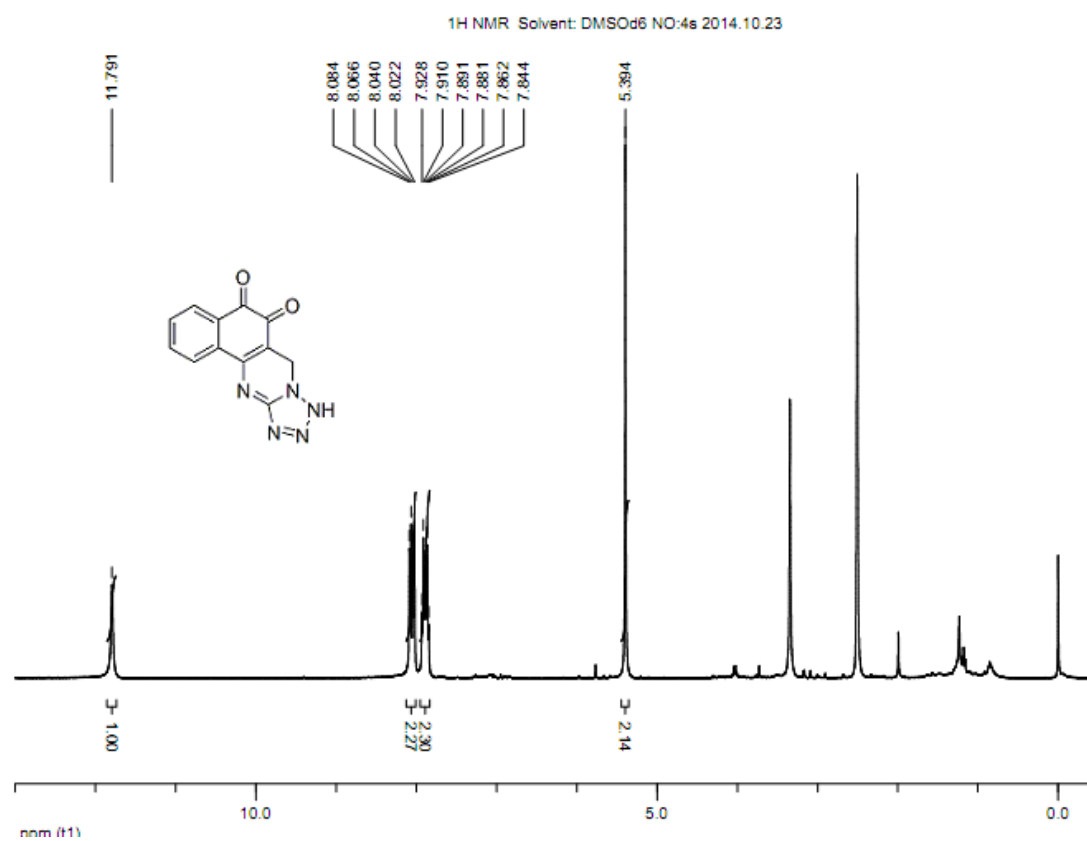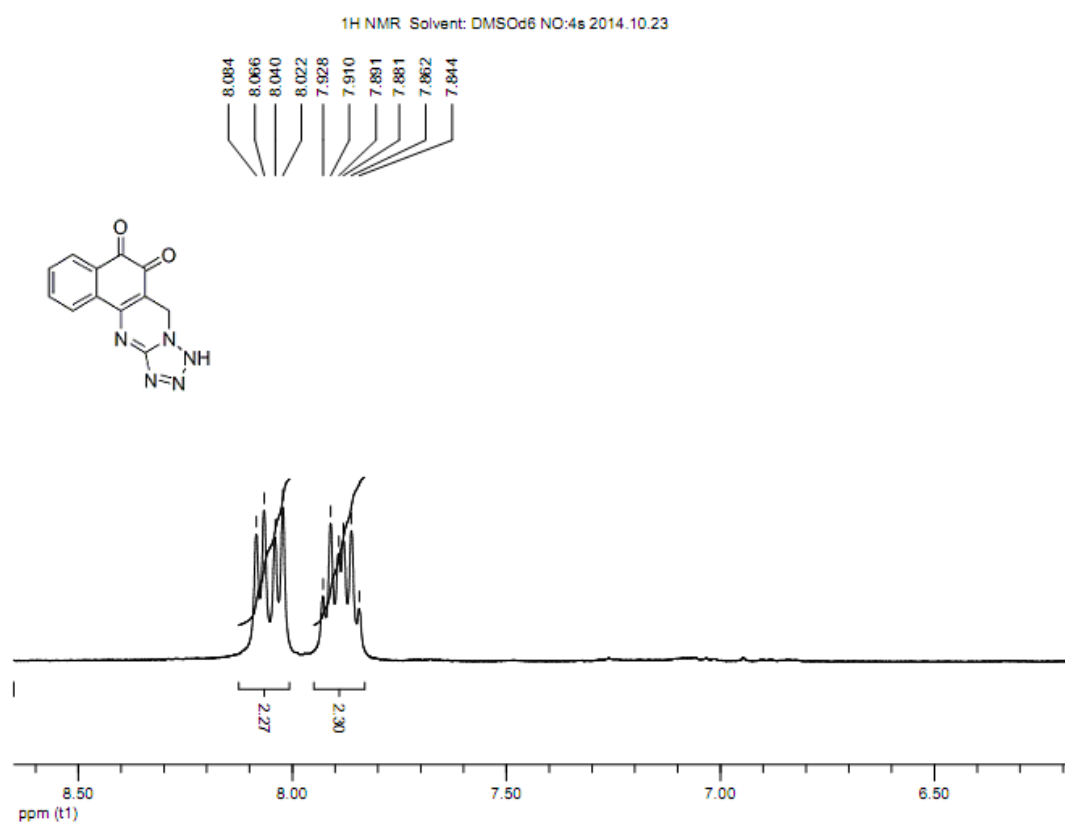

Figure 73  $^1\text{H}$  NMR of 4s



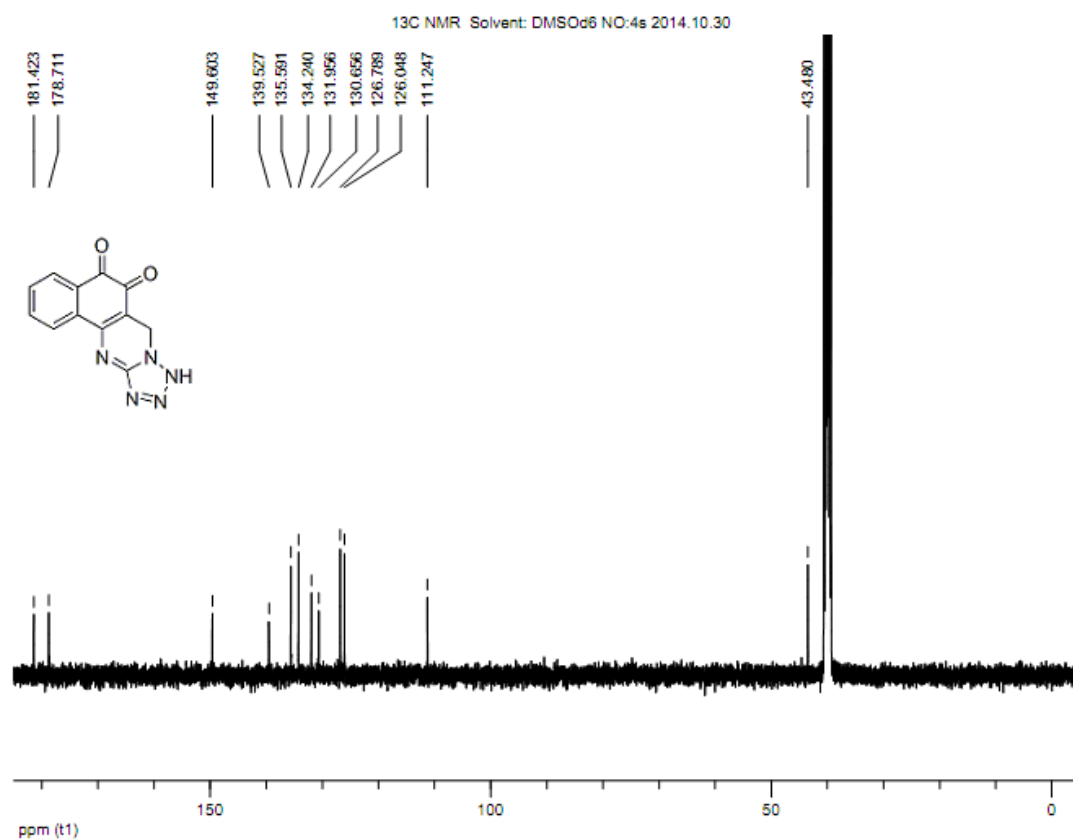

Figure 74 <sup>13</sup>C NMR of 4s

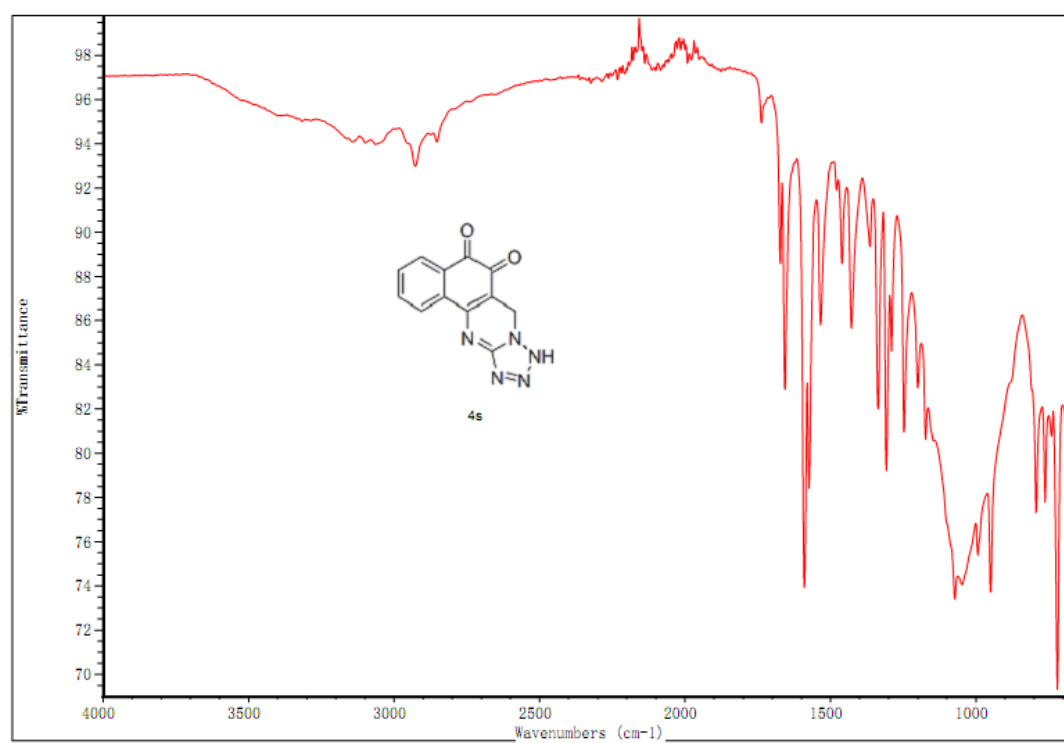

Figure 75 IR of 4s

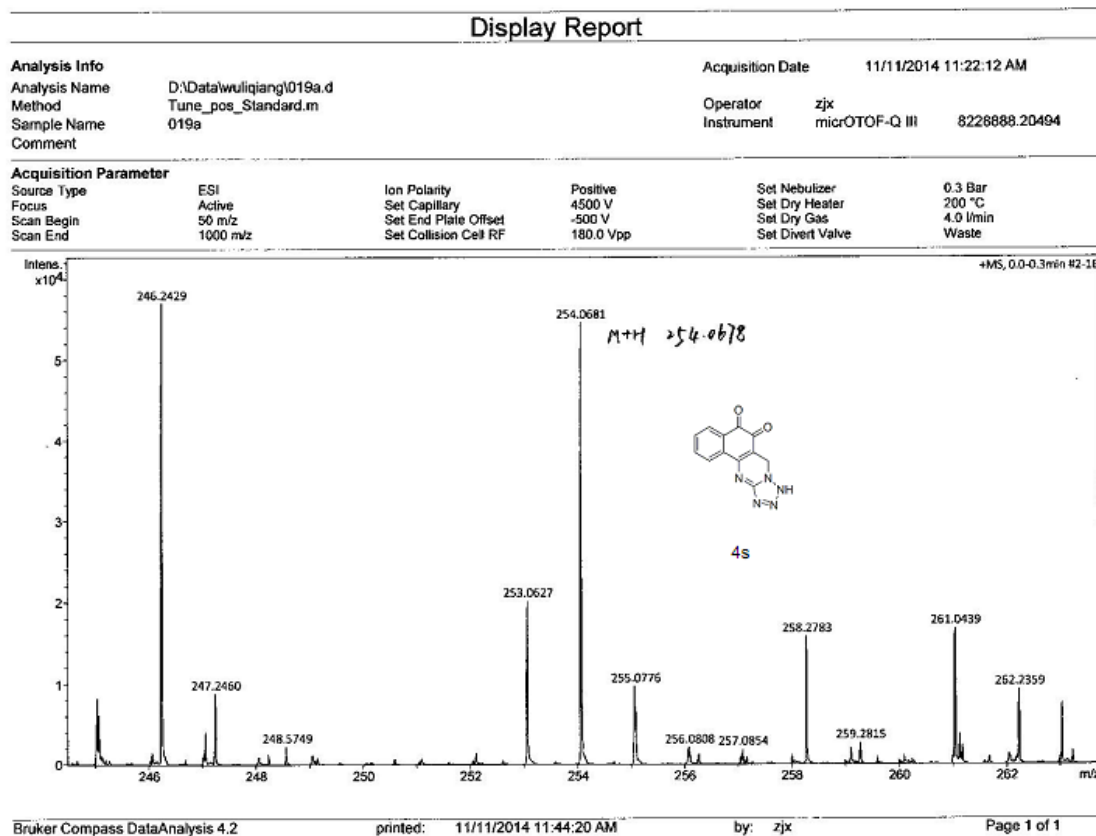

**Figure 76** HRMS of **4s**

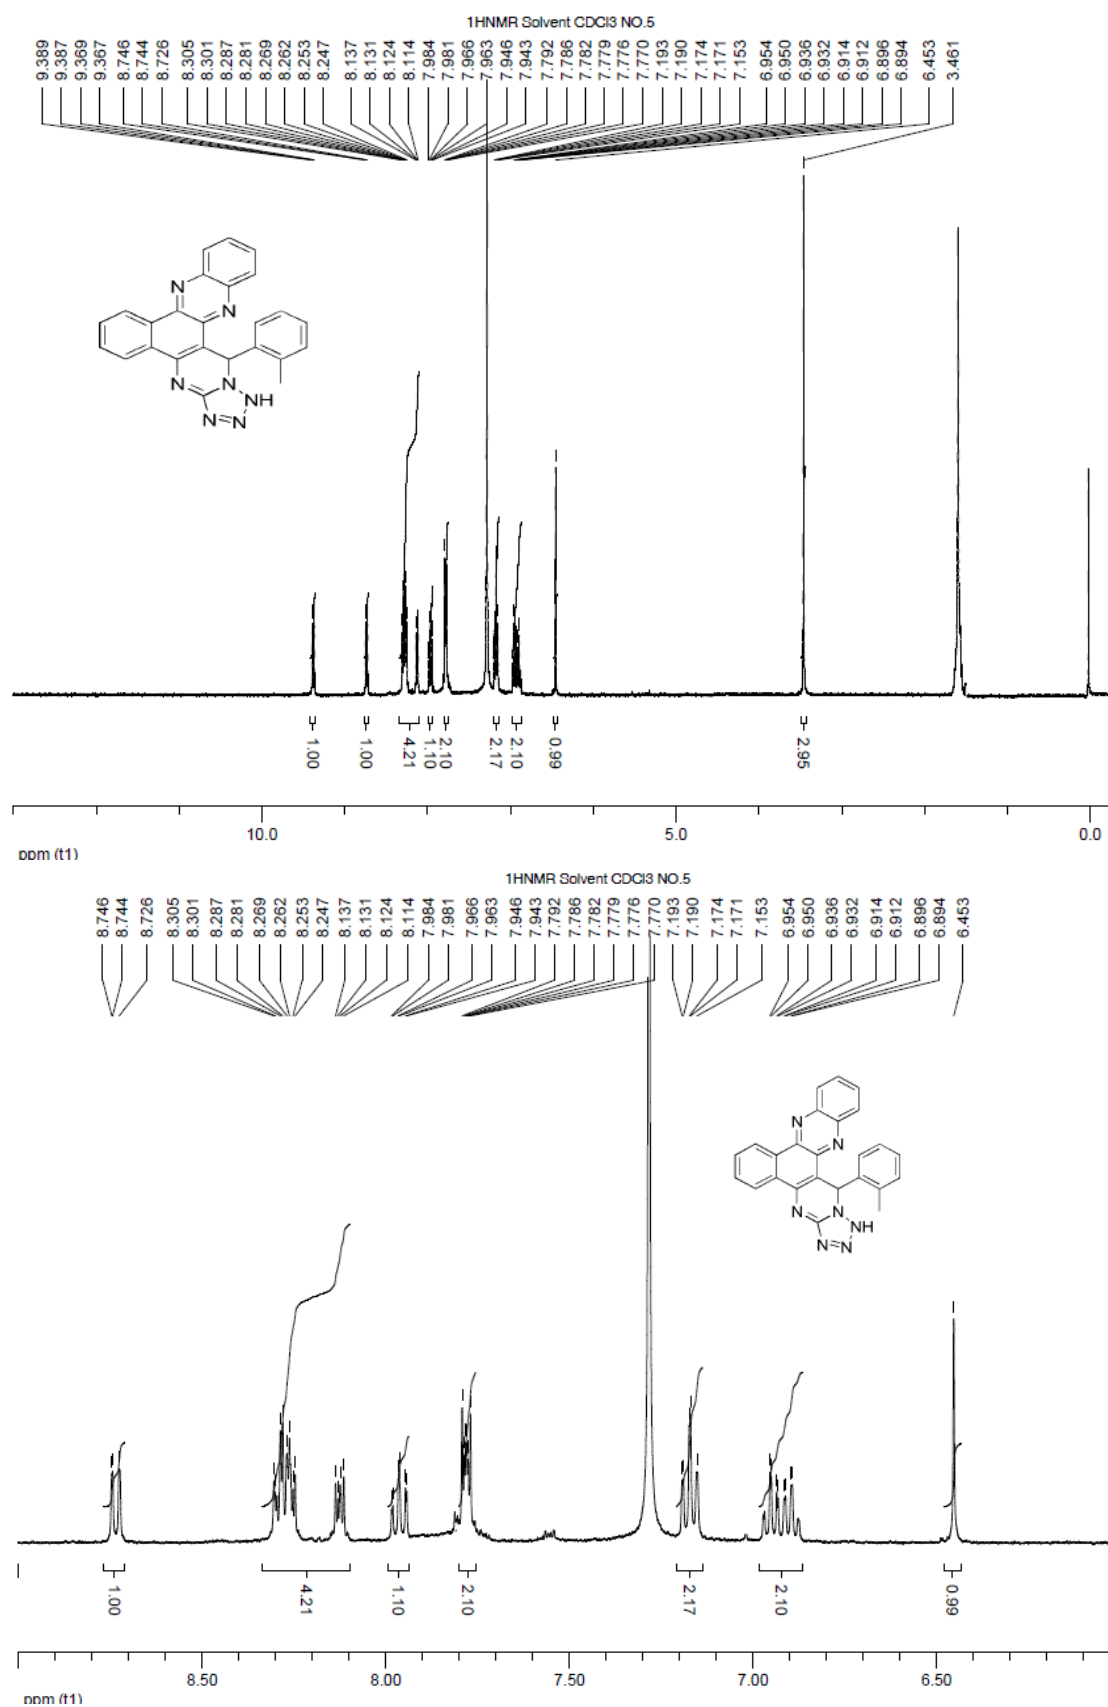

**Figure 77** <sup>1</sup>H NMR of **5**

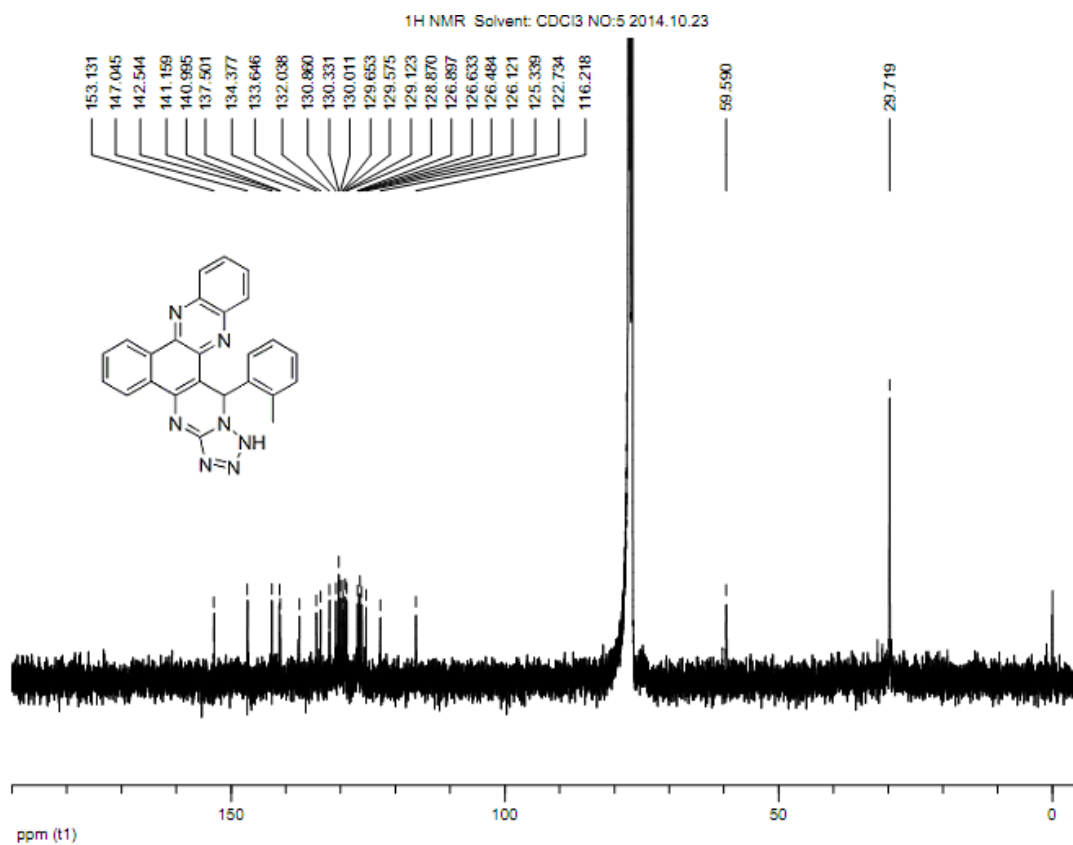

Figure 78  $^{13}\text{C}$  NMR of 5

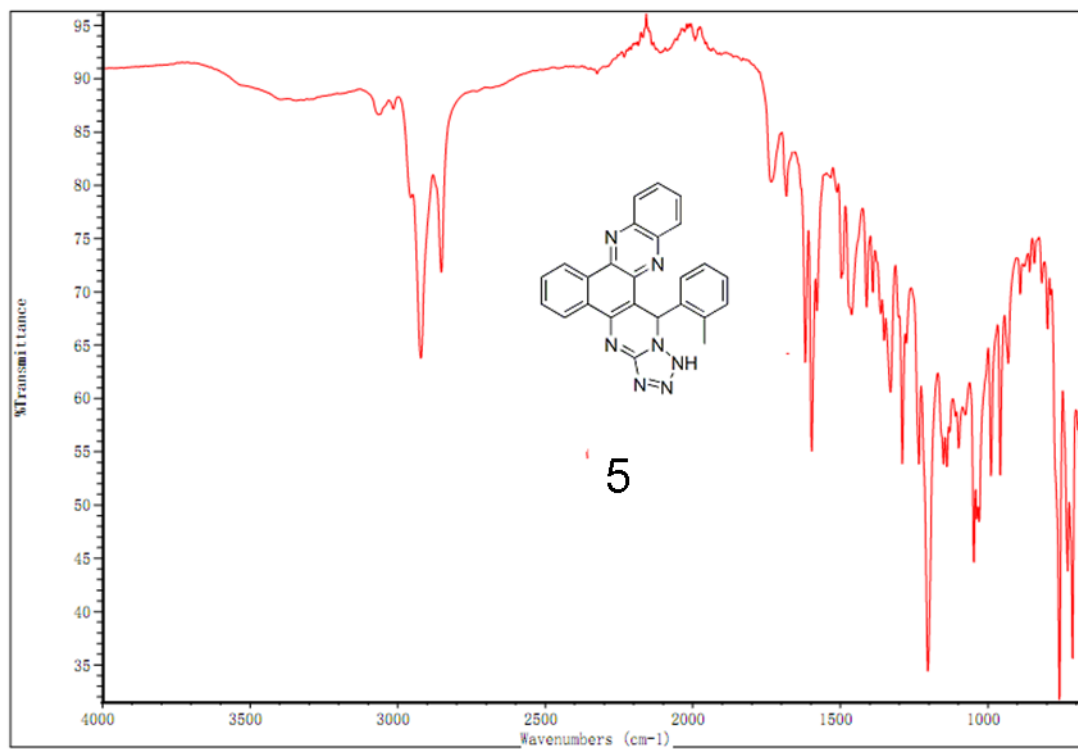

Figure 79 IR of 5
